# Supplementary material
Source: PubMed Central journal article supplement (PMC3249241)
Supplement: NIHMS331263-supplement-1.pdf [file NIHMS331263-supplement-1.pdf]

## **Metabolomic Profiling Reveals Potential Markers and Mechanism for Bladder Cancer Progression**

Nagireddy Putluri<sup>a\*</sup>, Ali Shojaie<sup>g,n\*</sup>, Vihas T Vasu<sup>b,e,o\*</sup>, Shaiju K. Vareed<sup>a</sup>, Srilatha Nalluri<sup>b,e</sup>, Vasanta Putluri<sup>a</sup>, Gagan Singh Thangjam<sup>b,e</sup>, Katrin Panzitt<sup>a</sup>, Christopher T. Tallman<sup>h</sup>, Charles Butler<sup>i,j</sup>, Theodore R. Sana<sup>k</sup>, Steven M. Fischer<sup>k</sup>, Gabriel Sica<sup>i,j</sup>, Daniel J. Brat<sup>i,j</sup>, Huidong Shi<sup>b,e</sup>, Ganesh S Palapattu<sup>l</sup>, Yair Lotan<sup>m</sup>, Alon Z. Weizer<sup>h</sup>, Martha K. Terris<sup>c,e,f</sup>, Shahrokh F. Shariat<sup>n</sup>, George Michailidis<sup>g</sup>, and Arun Sreekumar<sup>a,d,#</sup>

*<sup>a</sup>Departments of Molecular and Cell Biology, Verna and Marrs McLean Department of Biochemistry and Alkek Center for Molecular Discovery, Baylor College of Medicine, Houston, TX; Department of <sup>b</sup>Biochemisty, <sup>c</sup>Urology, <sup>d</sup>Surgery and <sup>e</sup>Cancer Center, Georgia Health Science University, Augusta, GA; <sup>f</sup>Section of Urology, Charlie Norwood Veteran Affairs Medical Center, Augusta, GA; <sup>g</sup>Department of Statistics and <sup>h</sup>Urology, University of Michigan, Ann Arbor, MI; <sup>i</sup>Department of Pathology and <sup>j</sup>Tumor Bank, Winship Cancer Center, Atlanta, GA; <sup>k</sup>Metabolomics Laboratory Application Group, Agilent Technologies, Santa Clara, CA; <sup>l</sup>Department of Urology, The Methodist Hospital, Houston, TX <sup>m</sup>Department of Urology, University of Texas Southwestern Medical Dallas, TX Center at Dallas, and <sup>n</sup>Weill Cornell Medical College, New York-Presbyterian Hospital, New York, NY, USA.*

*Current Address:*

*<sup>n</sup>Department of Biostatistics, University of Washington, Seattle WA*

*<sup>o</sup>Department of Medicine, Division of Oncology, National Jewish Health, Denver CO*

## *List of Supplemental Materials*

- 1) Supplemental Methods**
- 2) Supplemental Discussion**
- 3) References**
- 4) Supplementary Figures 1-6**
- 5) Supplementary Tables S1-S11**

## **Supplemental Methods**

### *Sample preparation for mass spectrometry-based examination of metabolome in tissues:*

Bladder tissues were stored at -140°C until analysis. For extraction of metabolome, 25 mg of tissue was homogenized in 1:4 ice cold water:methanol mixture containing equimolar mixture of 11 standard compounds [Epibrassinolide, [D3] Testosterone (mass difference from endogenous Testosterone = 3 Da), [15N] Anthranilic acid (mass difference from endogenous Anthranilic acid =1 Da), Zeatine, Jasmonic acid, Gibberelic acid, [D4] Estrone (mass difference from endogenous Estrone =4 Da), [15N]-Tryptophan (mass difference from endogenous Tryptophan =1 Da), [D4] Thymine (mass difference from endogenous Thymine =4 Da), [13C] Creatinine (mass difference from endogenous Creatinine =1 Da) and [15N] Arginine (mass difference from endogenous Arginine =1 Da)]. This was followed by sequential addition of ice cold chloroform and water in 3:1 ratio and separation of the organic (methanol and chloroform) and aqueous solvents (water:methanol:chloroform:water; ratio 1:4:3:1). The aqueous extract was de-proteinized using

a 3 KDa molecular filter (Amicon Ultracel -3K Membrane, Millipore Corporation, Billerica, MA) and the filtrate containing metabolites was dried under vacuum (Genevac EZ-2plus, Gardiner, NY). Prior to mass spectrometry, the dried extract was resuspended in identical volume of injection solvent composed of water:methanol (50:50) with 0.2% acetic acid and subjected to liquid chromatography (LC) mass spectrometry.

***Liquid Chromatography/Mass Spectrometry (LC/MS):*** The chromatographic separation of metabolites was performed using either reverse phase (RP) separation or aqueous normal phase separation online with QTOF/QQQ mass spectrometers (both Agilent Technologies, Santa Clara, CA).

The RP separation associated with the unbiased profiling employed a gradient composed of water (solvent A) and methanol (MeOH, solvent B, with both solvents modified by the addition of 0.2% acetic acid). The binary pump flow rate was 0.6 ml/min with a gradient spanning 2% B to 98% B over a 24 minute period. A column system consisting of a guard column made of Zorbax SB-C8 (2.1X 30 mm, 3.5  $\mu$ m) attached to an analytical Zorbax SB-Aq (2.1x50 mm, 1.8  $\mu$ m, Agilent Technologies, Santa Clara, CA) was used for separating the metabolites.

For the targeted profiling (SRM), the RP chromatographic method employed a gradient containing water (solvent A) and acetonitrile (ACN, solvent B, with both solvents containing 0.2% Acetic acid and 0.1% formic acid). Separation of metabolites was performed on a Zorbax Eclipse XDB-C18 column (50  $\times$  4.6 mm i.d.; 1.8  $\mu$ m, Agilent Technologies, CA) maintained at 37°C. The binary pump flow rate was 0.2 ml/min with a gradient spanning 2% B to 95% B over a 25 minute time period.

In addition, an aqueous normal phase (ANP) chromatographic separation was also used for targeted identification of metabolites. This employed solvents containing acetonitrile (ACN, solvent A): water (solvent B), with both solvents modified by the addition of 0.2% Acetic acid and 0.1% formic acid. The binary pump flow rate was 0.4 ml/min with a gradient spanning 95 % B to 2 % B over a 20 minute period. Metabolites were separated on a Diamond Hydride column (4 $\mu$ m, 100A 2.1x150mm, MicroSolv Technology, Eatontown, NJ), that was maintained in temperature controlled chamber (37°C). All the columns used in this study were washed and reconditioned after every 50 injections.

As controls to monitor the profiling process, an equimolar mixture of 11 standard compounds (described under the section titled “Sample preparation for mass spectrometry-based examination of metabolome in tissues”), and a characterized pool of mouse liver tissue were extracted and analyzed in tandem with the clinical samples. These controls were incorporated multiple times into the randomization scheme such that sample preparation and analytical variability could be constantly monitored. Furthermore, two blank runs were performed following the analysis of each clinical sample to prevent any carryover of metabolites.

***Metabolomic Mass Spectrometry*** The mass spectrometry portion of the unbiased profiling platform is based on a 1200 SL Rapid resolution LC and a 6520 Quadrupole Time Of Flight (Q-TOF) mass spectrometer (Agilent Technologies, Santa Clara, CA). The samples were independently examined in both positive and negative ionization modes using a dual Electrospray Ionization (ESI) source. Real time mass correction during mass spectrometry was achieved by infusion of a standard mixture of reference ions using an independent 1200 SL Rapid resolution LC isocratic pump equipped with 100:1 splitter to output a flow rate of 5 ml/min. This reference mixture supplied by the vendor contained ions with m/z 121.050873,

922.009798 and 119.03632, 966.000725 for mass correction in the positive (+) and negative (-) ionization modes respectively. A mass range between 50-1000 m/z was employed for the entire unbiased profiling process. The mass accuracy for the profiling study was below 10 ppm. The data acquisition during the analysis was controlled using the Mass Hunter workstation data acquisition software. Parameters used during the mass spectrometry analysis were 1) capillary voltage set at 4000 V (negative mode 3500 V); 2) source temperature set at 325 C; 3) drying gas used at 10 ml/min; 4) nebulizer pressure maintained at 45 psig (reference ion nebulizer 10 psig); 5) fragmentor voltage set at 140V and 6) skimmer voltage maintained at 65 V. Ultra high, pure nitrogen was used as the nebulizer and collision gas for the entire analysis. For collision induced dissociation (CID) experiments, the precursor ion was selected using the quadrupole analyzer set to high-resolution mode while the product ions were analyzed by the TOF analyzer. The collision energies in all the experiments were set between 10-40 eV unless otherwise specified. For the unbiased profiling experiments, mass spectral data was acquired in both centroid and profile modes.

Single Reaction Monitoring (SRM) experiments were performed using a Triple Quadrupole Mass Spectrometer (QQQ Agilent Technologies, Santa Clara CA, refer to **Supplementary Table S8** for SRM transitions). The operational parameters for this mass spectrometer included 1) source conditions capillary voltage of 3000 V and source temperature of 350°C, 2) drying gas maintained at 10 ml/min, 3) nebulizer pressure set at 35 psig and 4) fragmentor voltage set at 70 V. The collision energies used for fragmentation was set at 10-40 eV unless otherwise stated.

Metabolomic Library, METLIN: This was used to search the mass spectral data. METLIN (Agilent Technologies, Santa Clara, CA), was created using approximately 1000

commercially available compounds whose retention time was defined using the RP and ANP chromatographic methods described above. Additionally, it also contained mass and fragment ion information for these compounds in both positive and negative ionization modes. Both mass and retention time information were employed to name the compounds detected in this study.

***Metabolomic Data Analysis:*** Metabolites in the profiling data, with more than 75% missing values across samples were removed from the analysis. The above procedure resulted in 1509, 510 and 55 compounds in unbiased positive (+) and negative (-) ionization and Single Reaction Monitoring (SRM) data, respectively, resulting in 1905 unique compounds (listed in **Supplementary Table S9**) across platforms, from which 99 metabolites were named. For the remaining metabolites, the distribution of proportion of missing values in bladder cancer and benign samples were examined, and compounds with more than 90% missing values in each group, and less than 75% missing values overall, were considered to have biological missingness. Missing values for this group of metabolites were replaced (imputed) with the intensity value at the detection level (corresponding to a value of 2000). The missing measures in the remainder of metabolites were imputed using the nearest- neighbor algorithm with  $k=5$ , using the package “pamr” (1) in the R programming language (2). Imputed data from positive and negative ionization were log<sub>2</sub> transformed and quantile normalized per sample using the R-package “limma” (3). To avoid bias due to a small number of compounds measured by targeted mass spectrometry, median centering was employed instead of quantile normalization for data pre-processing. Heat maps were drawn using R-packages “gplot” (4). Data obtained from different platforms were z-transformed and compared across samples. The samples from different platforms were then combined by averaging over duplicate samples for every given compound (eg. samples from positive and negative ionization and SRM). Hierarchical clustering

was performed using complete linkage with Pearson's correlation. A two-sided t-test was used to assess the association of each metabolite with the cancer status of the sample. Significance was determined using 10,000 sample permutations, and the resulting p-values were then adjusted for multiple testing using FDR with  $q^*=0.2$ . Tests on all of the metabolites were adjusted by calculating the q-values for FDRs using the procedure implemented in the R-package `fdrtool` (5). FDR controlling procedure described in (6) was employed to correct the tests for named metabolites. The latter method was implemented to prevent the breakdown of the q-value based method in a small number of tests.

Data from urine samples were first normalized with respect to the osmolarity level of the sample, and then median centered and normalized using the inter-quartile range (IQR). Heat maps and hierarchical clustering were obtained as described above for tissue data. Partial Least Square Discriminant Analysis (PLS-DA) classification models in urine with two principal components (R-packages “`pls`” and “`caret`”) (3, 7) were used to classify the benign and BCa samples in different datasets, as well as Muscle-Invasive and Non-Muscle-Invasive samples in the UM data set. Three-fold cross validation (CV) was used to assess the performance of the classification models in UM data. In order to obtain more reliable estimates, the process was repeated 1000 times, with random splitting of the data into three folds each time. In particular, we built a partial least squares discriminate analysis (PLS-DA)-based classifier with two principal components (PC1 and PC2) on a randomly selected set of two-thirds ( $n = 30$ , training set) of the urine specimens from the Group 2 (UM data) and assessed its performance on the remaining one-third ( $n = 14$ ) of the samples in this group (test set). The process of training and testing was repeated 1,000 times to evaluate the performance of the PLS-DA classifier. ROC plots were drawn using the available functions in the R-package “`caret`” (7).

**Integrative Molecular Concept Modeling of BCa Progression:** We examined whether BCa-associated metabolites might be associated with altered biochemical processes fundamental to BCa development and progression using OncoPrint Concept Maps (OCM), as described earlier (8). OCM compares the information within the BCa-associated metabolome with different biologic concepts represented by molecular signatures a.k.a. molecular concepts (i.e., lists of genes, proteins etc) (8). The latter is derived from cancer-related profiles including both gene and protein annotations from external databases, as well as computationally-derived regulatory networks. The regulatory networks were derived by scanning human promoters for known transcription factor motifs and by comparative genomics analyses, which identified the conserved promoter and 3'UTR elements. The compendia of molecular concepts for OCM analysis consisted of data from 13 databases and 335 high-throughput datasets (9).

For the OCM analysis, we used the premise that metabolites are end-products of gene/protein action and hence their levels will reflect the activity of the corresponding enzymes (both synthetic and breakdown). We derived a list of genes whose activity could potentially alter the levels of metabolites in the BCa-associated signature. These genes were used to carry out all-versus-all association analyses with the various cancer-related molecular signatures compiled from the external databases and computationally-derived regulatory networks. The genes associated with metabolic pathways in *Homo sapiens* and listed in KEGG (Kyoto Encyclopedia of Genes and Genomes) were used as the null set. To select concepts of potential interest, enrichment p-values derived using Fisher's exact test were adjusted for multiple comparisons and an FDR threshold of 10% was used. These "Molecular concepts" allowed us to link BCa-associated metabolomic signatures to biological processes, generating novel mechanistic insights



on BCa progression. A subset of molecular concepts is displayed in **Fig.4A**, and a list of all enriched concepts with their p-values is shown in **Supplementary Table S11**.

**Immunoblot Analysis:** Frozen bladder tissues (cancer and adjacent benign) tissue specimens were lysed in RIPA buffer (50 mM Tris-HCl, pH 7.4, 150 mM NaCl, 1 mM EDTA, 1% Triton X-100, 1% Sodium deoxycholate, 0.1% sodium dodecyl sulphate, protease and phosphatase inhibitors) and their protein concentration was determined by BCA protein assay kit as per manufacturer's instructions (Thermo Scientific, Rockford, IL). Equal amount of protein (30 µg) was separated by SDS-PAGE using pre-cast 4-20% mini-protean TGX gels (Bio-Rad laboratories, Hercules, CA) and transferred to Immobilon-PVDF (Polyvinylidene fluoride) membrane (Millipore Corp., Billerica, MA). The membranes were blocked in 3% non-fat dry milk (in TBST) for 1 h and incubated overnight with CYP1A1/CYP1B1 and/or GAPDH (loading control) primary antibodies (both from Santa Cruz Biotechnology Inc., Santa Cruz, CA). After washing the membranes with TBST, they were incubated with appropriate secondary antibodies (Cell Signaling, Danver, MA) for 1 h, washed, proteins detected by ECL chemiluminescence detection kit (Thermo Scientific, Rockford, IL) and captured on autoradiography film (Denville Scientific Inc., Metuchen, NJ).

### **Supplemental Discussion:**

**Relevance of methylation-induced regulation of xenobiotic metabolizing enzymes:** Using a data-driven approach, we confirmed a role for methylation as an additional contributing factor in regulating the expression of xenobiotic metabolizing enzymes. Importantly, this observation could be a consequence of elevated SAM levels within BCa tumors themselves. Interestingly, a

recent study demonstrated the existence of a novel epigenetic signature during BCa progression (10), supporting our metabolome-based findings. Furthermore, our findings provide additional rationale for the use of DNA hypomethylating agents like Zorbularin and Azacytidine in BCa, as shown by earlier studies using in vitro and in vivo models of the disease (11, 12).

## References

1. Hastie T, Tibshirani R. Exploring the nature of covariate effects in the proportional hazards model. *Biometrics*. 1990;46:1005-16.
2. Team RDC. A language and environment for statistical computing. R Foundation for Statistical Computing,. 2008 [cited; Available from: <http://www.R-project.org>.
3. Smyth GK. Limma: linear models for microarray data'Bioinformatics and Computational Biology Solutions using R and Bioconductor. In: R. Gentleman VC, S. Dudoit, R. Irizarry, W. Huber, editor. *Bioinformatics and Computational Biology Solutions using R and Bioconductor*. New York: Springer; 2005. p. 397-420.
4. Bolker B, Bonebakker L, Gentleman R, Huber W, Liaw A, Lumley T, et al. gplots: Various R programming tools for plotting data. . In: Warnes GR, editor. *R package version 2.8.0*. ed; 2010.
5. Strimmer K. fdrtool: a versatile R package for estimating local and tail area-based false discovery rates. *Bioinformatics*. 2008;24:1461-2.
6. Benjamini Y, Hochberg Y. Controlling the false discovery rate: a practical and powerful approach in multiple testing. *Journal of Royal Statistical Society*. 1995;Series B 57.
7. Wing J, Weston S, Williams A, Keefer C, Engelhardt A. caret: Classification and Regression Training. R package In: Kuhn M, editor. *version 4.67*. ed; 2010.
8. Rhodes DR, Kalyana-Sundaram S, Tomlins SA, Mahavisno V, Kasper N, Varambally R, et al. Molecular concepts analysis links tumors, pathways, mechanisms, and drugs. *Neoplasia*. 2007;9:443-54.
9. Putluri N, Shojaie A, Vasu VT, Nalluri S, Vareed SK, Putluri V, et al. Metabolomic profiling reveals a role for androgen in activating amino Acid metabolism and methylation in prostate cancer cells. *PLoS One*. 2011;6:e21417.
10. Vallot C, Stransky N, Bernard-Pierrot I, Herault A, Zucman-Rossi J, Chapeaublanc E, et al. A novel epigenetic phenotype associated with the most aggressive pathway of bladder tumor progression. *Journal of the National Cancer Institute*. 2011;103:47-60.
11. Karam JA, Fan J, Stanfield J, Richer E, Benaim EA, Frenkel E, et al. The use of histone deacetylase inhibitor FK228 and DNA hypomethylation agent 5-azacytidine in human bladder cancer therapy. *Int J Cancer*. 2007;120:1795-802.

12. Cheng JC, Weisenberger DJ, Gonzales FA, Liang G, Xu GL, Hu YG, et al. Continuous zebularine treatment effectively sustains demethylation in human bladder cancer cells. *Molecular and cellular biology*. 2004;24:1270-8.

**Supplementary Figure 1.** Over-view of various steps employed for pre-processing and post-processing of metabolomic data.

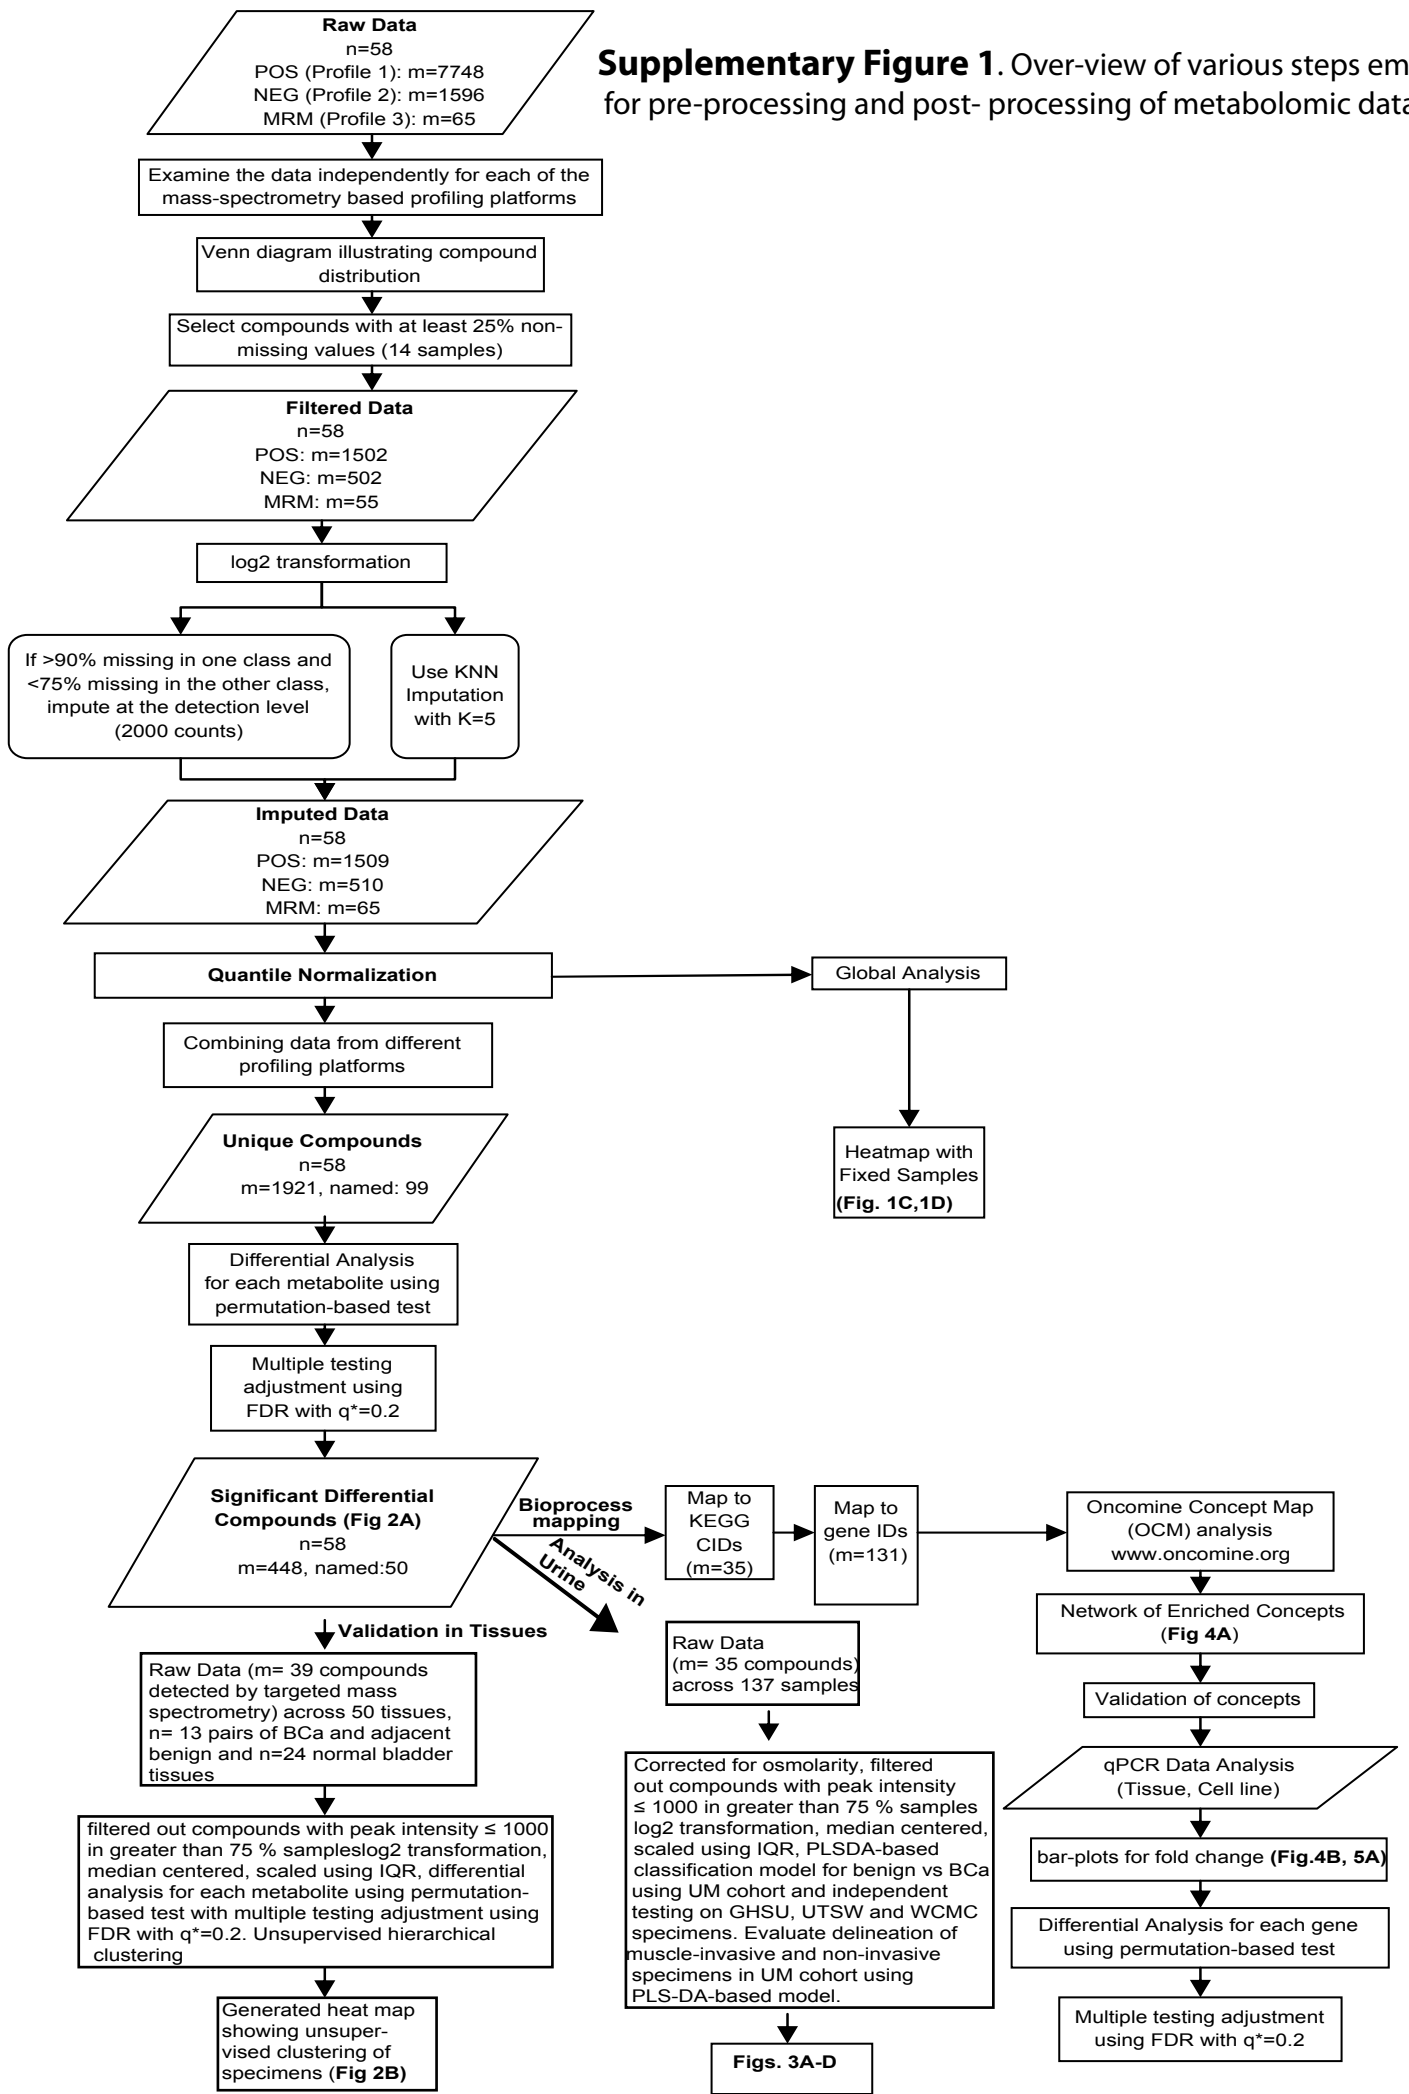

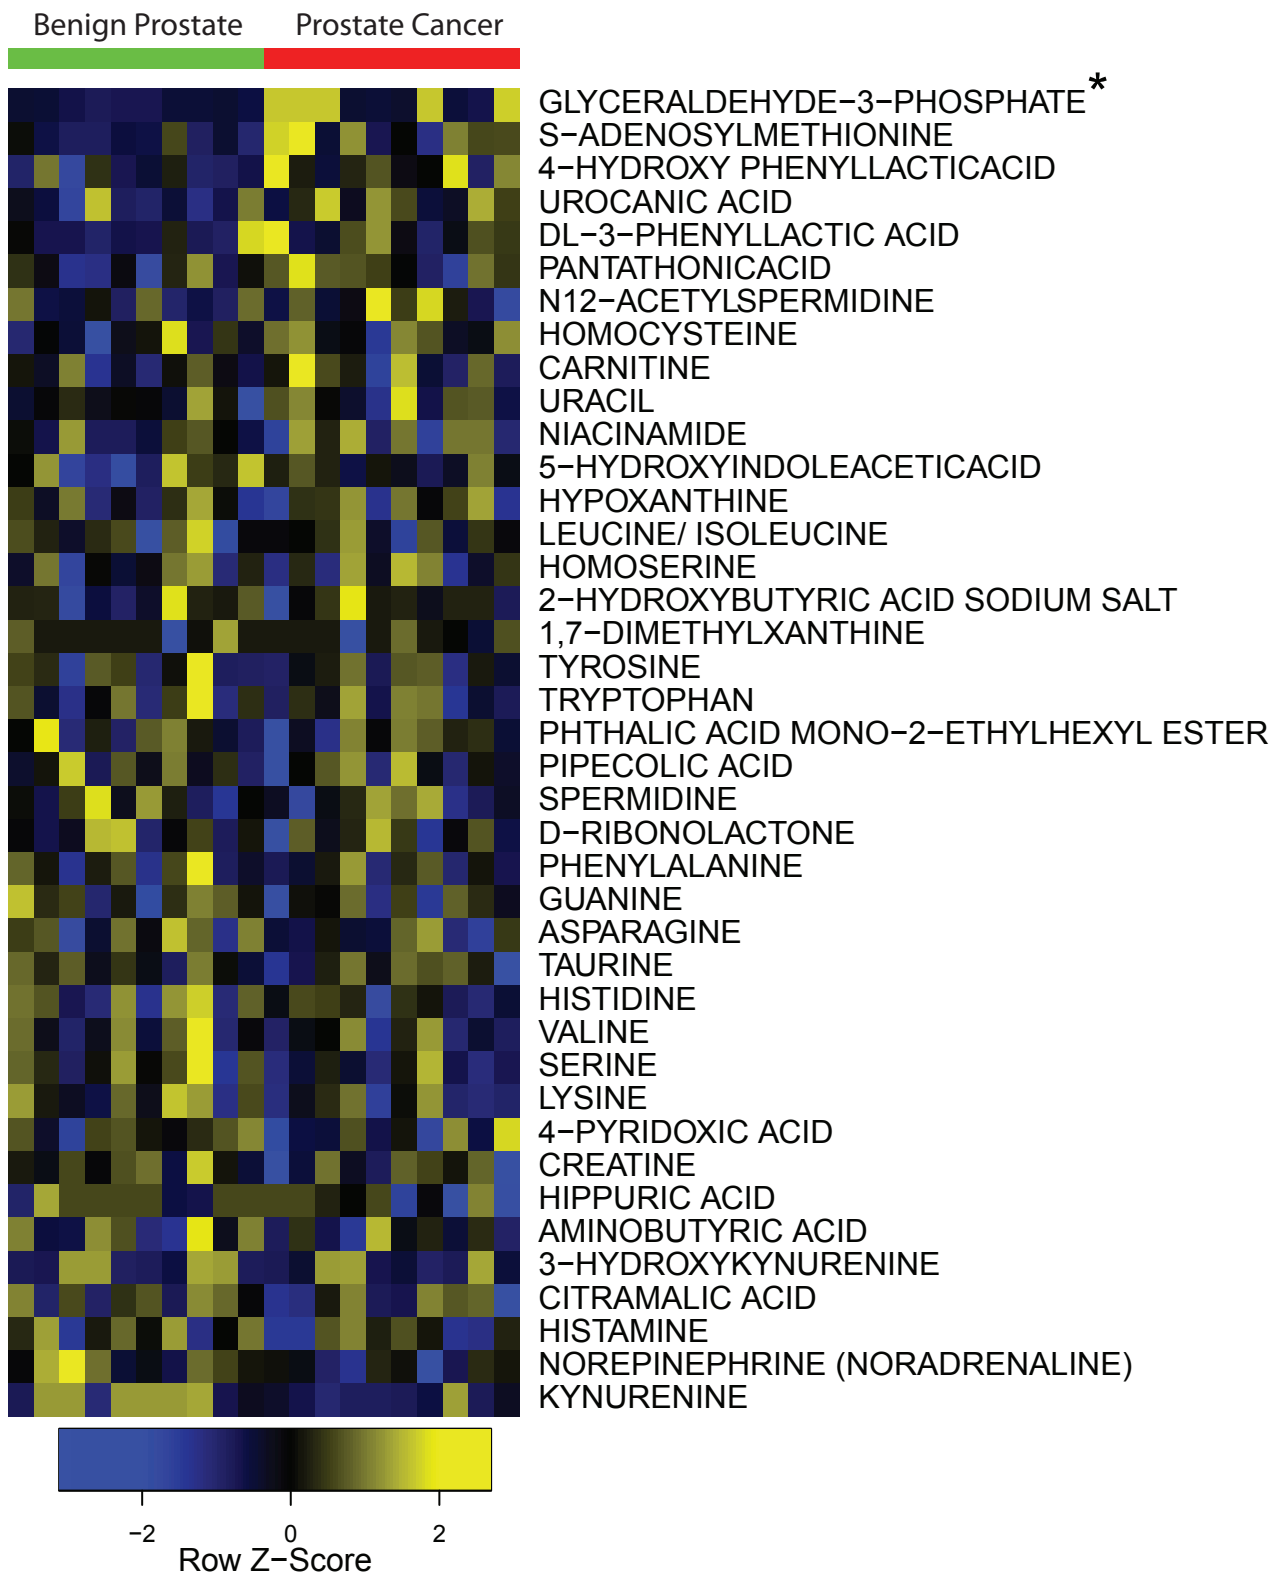

**Supplementary Figure 2** Heat map showing relative levels of 40 bladder-cancer associated metabolites in benign prostate (n=10) and prostate cancer (n=10). Only glyceraldehyde-3-phosphate levels (indicated by \*) were significantly elevated in prostate cancer as was the case in bladder cancer.

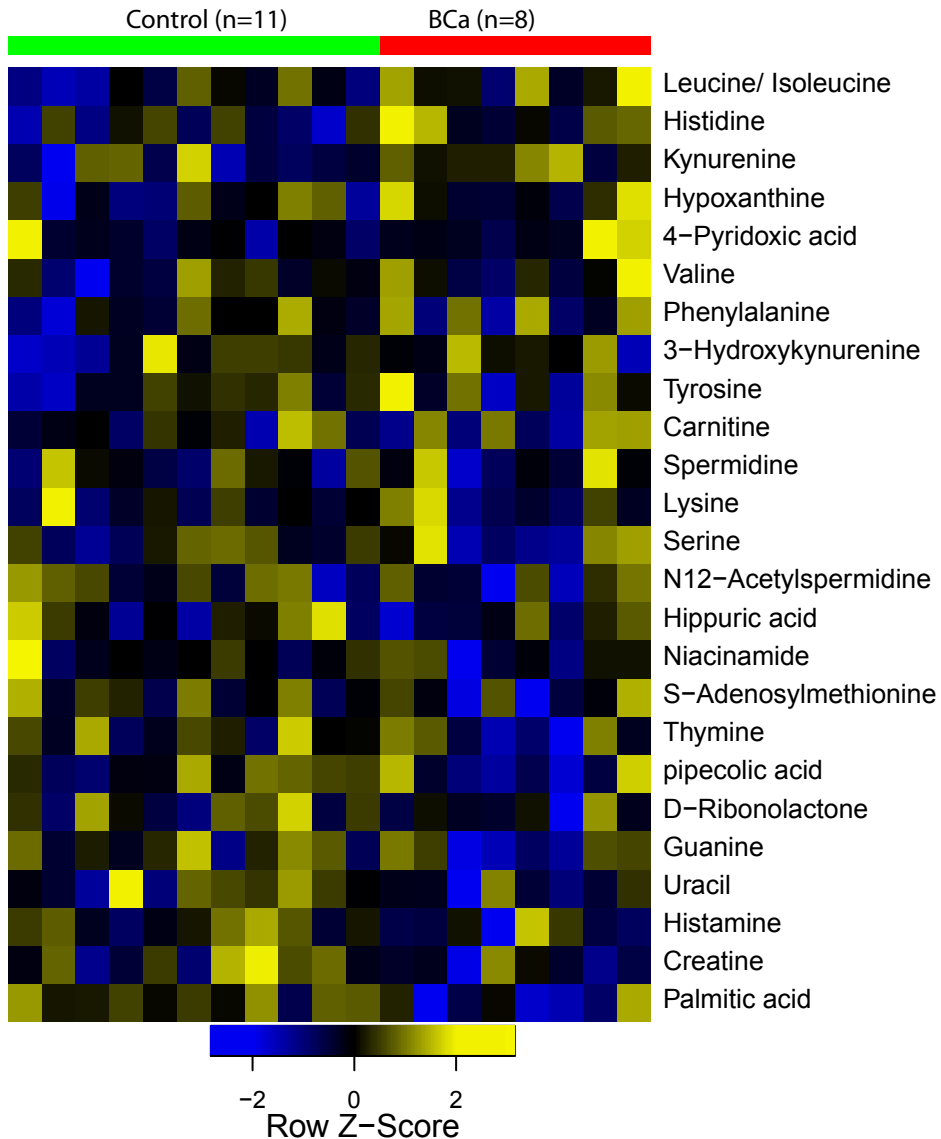

**Supplementary Figure 3.** Heat map showing relative levels of 25 bladder-cancer associated metabolites in urine from bladder cancer (n=8) and control (n=11) individuals. The control urine was collected from patients having no prior/current history of bladder cancer and diagnosed with either prostate cancer or other non-cancer urological conditions like kidney stone, neurogenic bladder etc.

### Supplementary Figure 4.

Correlation plots showing concordance in levels of BCa-specific metabolites (n=25 + 7 spiked standards) measured using targeted mass spectrometry across replicates of urine specimens from 10 patients

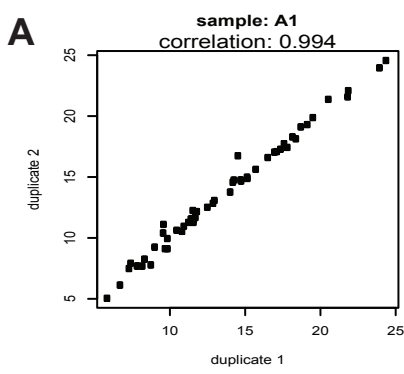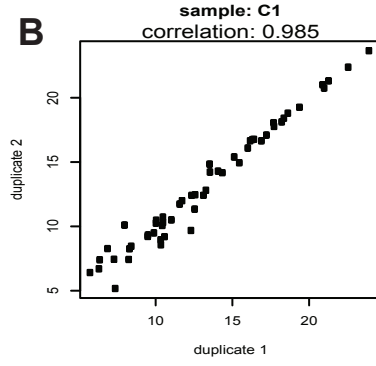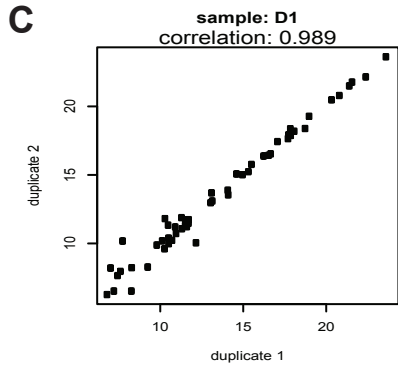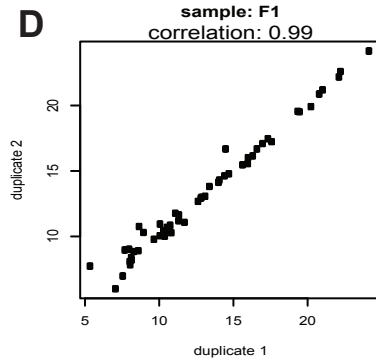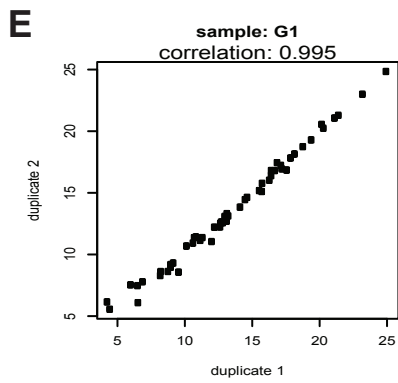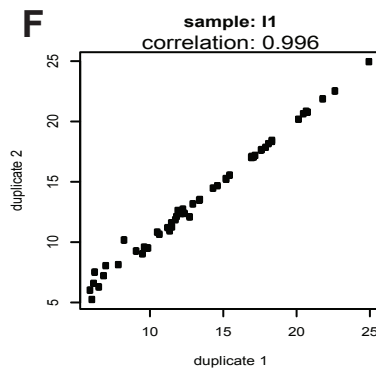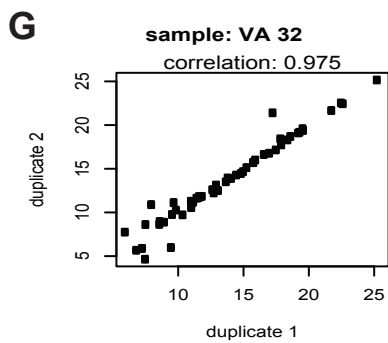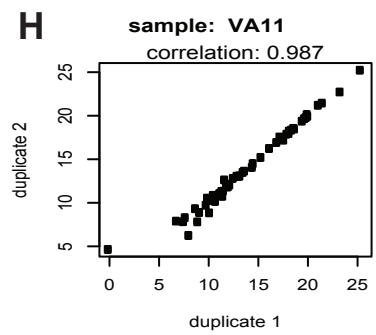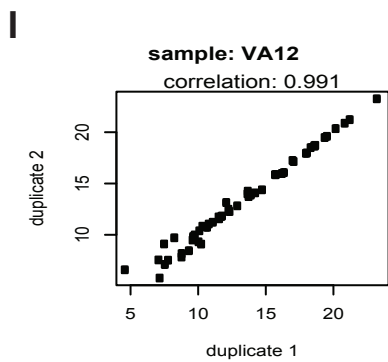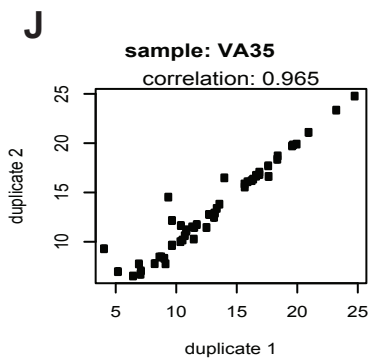

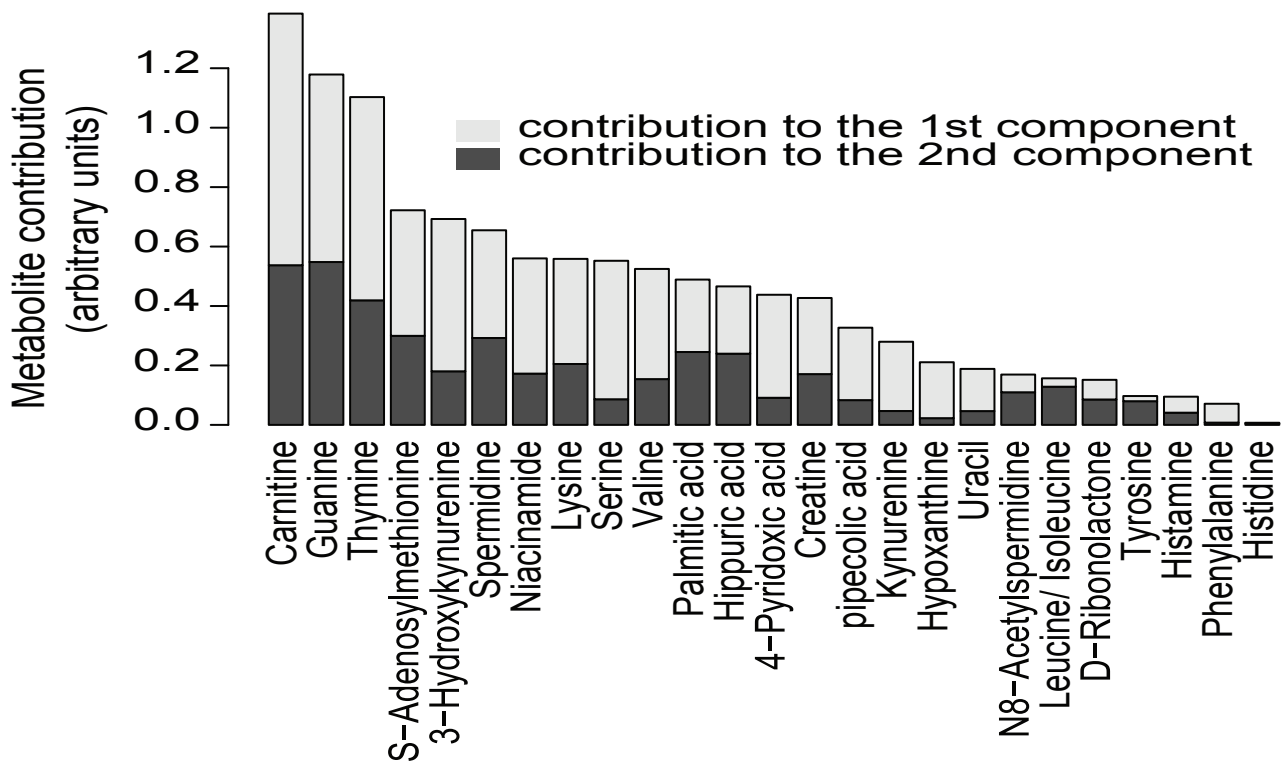

### Supplementary Figure 5.

Plot showing the contribution of metabolites in a PLS-DA model used for classification of benign and BCa in urine in a model with two principal components (PCs). Contributions of each metabolite are calculated as the sum of the absolute value of the coefficient of each compound for the first (shown by black bars) and second (grey bars) PCs.



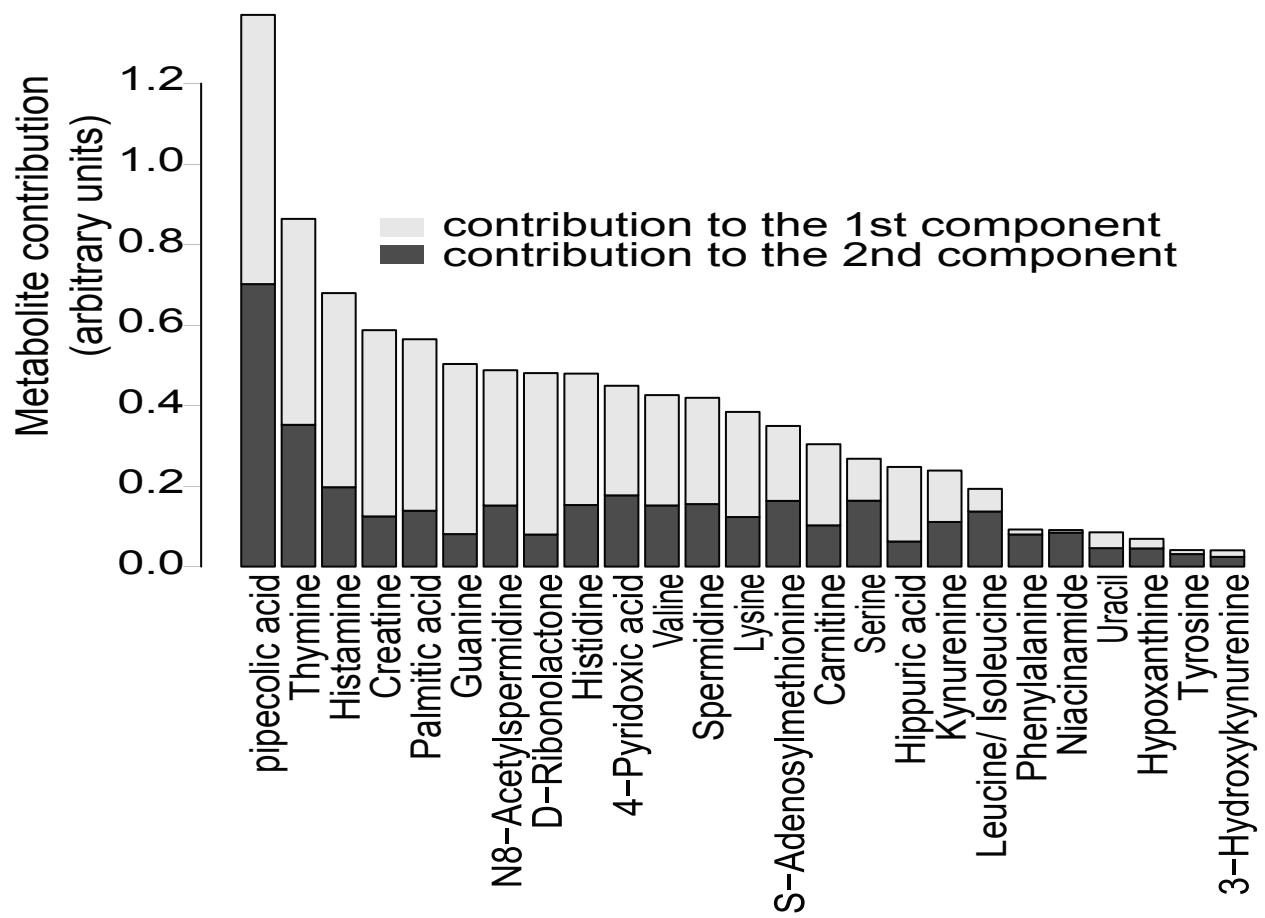

## Supplementary Figure 6.

Plot showing the contribution of metabolites in a PLS-DA model used for classification of non-muscle-invasive and muscle-invasive BCa in urine in a model with two principal components (PCs). Contributions of each metabolite are calculated as the sum of the absolute value of the coefficient of each compound for the first (shown by black bars) and second (grey bars) PCs.

**Supplementary Table S1.** Detailed clinical information of bladder-derived tissues used for metabolomic profiling

| Specimen ID          | Age | Gender | Tissue              | Specimen Type | Type of Carcinoma                   | Muscle Invasion Status (y/n) | Grade (high/low) | Grading | TNM staging |
|----------------------|-----|--------|---------------------|---------------|-------------------------------------|------------------------------|------------------|---------|-------------|
| P1T-EU<br>P1N-EU     | 71  | M      | Bladder             | T<br>N        | Infiltrating,urothelial, TCC        | y                            | high             | G2      | T3aN0Mx     |
| P2T-EU<br>P2N-EU     | 69  | M      | Bladder             | T<br>N        | Urothelial,TCC                      | y                            | high             | G2      | T3bN2M1     |
| P3T-EU<br>P3N-EU     | 56  | M      | Bladder             | T<br>N        | Urothelial, Invasive Papillary, TCC | y                            | high             | G2      | T2bN0Mx     |
| P4T-EU<br>P4N-EU     | 51  | M      | Bladder             | T<br>N        | Urothelial,TCC                      | n                            |                  |         |             |
| P5T-EU<br>P5N-EU     | 59  | M      | Bladder             | T<br>N        | Urothelial,TCC                      | y                            | high             | G2      | T2bN2Mx     |
| P6T-EU<br>P6N-EU     | 57  | M      | Bladder             | T<br>N        | Urothelial,TCC                      | y                            | high             | G2      | T2aN0Mx     |
| P7T-EU<br>P7N-EU     | 71  | M      | Bladder             | T<br>N        | Urothelial,TCC                      | y                            | high             | G2      | T2aN0Mx     |
| P8T-EU<br>P8N-EU     | 80  | M      | Bladder             | T<br>N        | Urothelial,TCC                      | y                            | high             | G2      | T3aN1Mx     |
| P9T-EU<br>P9N-EU     | 64  | M      | Bladder             | T<br>N        | Urothelial,TCC                      | y                            | high             | G2      | T3aN Mx     |
| P10T-EU<br>P10N-EU   | 68  | M      | Bladder             | T<br>N        | Urothelial,TCC                      | y                            | high             | G2      | T4aN0Mx     |
| P11T-EU<br>P11N-EU   | 67  | M      | Bladder             | T<br>90% N    | Urothelial,TCC                      | y                            | high             | G2      | T4aN2Mx     |
| P12T-EU<br>P12N-EU   | 62  | M      | Bladder             | T<br>N        | Urothelial,TCC                      | n                            | high             | G2      | T3aN1Mx     |
| P13T-EU<br>P13N-EU   | 62  | M      | Bladder             | T<br>N        | Urothelial,TCC                      | n                            | high             | G1      | TisN0Mx     |
| P14T-EU<br>P14N-EU   | 55  | M      | Bladder             | T<br>CIS      | Urothelial,TCC, Invasive            | y                            | high             | G2      | T3bN0Mx     |
| P15T-EU<br>P15N-EU   | 71  | M      | Bladder             | T<br>N        | Urothelial,TCC                      | y                            | high             | G2      | T4aN2Mx     |
| P16T-EU<br>P16N-EU   | 56  | M      | Bladder w/ Prostate | T<br>N        | Urothelial,TCC                      | y                            | high             | G2      | T3aN2Mx     |
| P7T-MCG<br>P3N-MCG   | 83  | F      | Bladder             | 50% T<br>N    | Urothelial,TCC                      | n                            | high             |         | T3aN1MX     |
| P9T-MCG<br>P4N-MCG   | 63  | M      | Bladder             | 55% T<br>N    | Urothelial,TCC                      | n                            |                  |         |             |
| P10T-MCG<br>P5N-MCG  | 54  | M      | Bladder             | 40% T<br>N    | Urothelial,TCC                      | n                            |                  |         | T2a         |
| P11T-MCG<br>P6N-MCG  | 78  | M      | Bladder             | T<br>N        | Urothelial,TCC                      | n                            | high             |         | n/a         |
| P13T-MCG<br>P8N-MCG  | 71  | M      | Bladder             | 40% T<br>N    | Urothelial,TCC                      | n                            |                  |         | Unknown     |
| P1T-MCG<br>P1N-MCG   | 67  | M      | Bladder             | T<br>N        | Urothelial,TCC, papillary           | n                            | high             |         | T2AN0MO     |
| P2T-MCG<br>P2N-MCG   | 74  | M      | Bladder             | T<br>N        |                                     |                              |                  |         | T1N0        |
| P8T-MCG<br>P11N-MCG  | 68  | F      | Bladder             | T<br>N        | Urothelial,TCC                      | n                            |                  |         |             |
| P12T-MCG<br>P7N-MCG  | 71  | M      | Bladder             | T<br>N        | Urothelial,TCC, papillary           | n                            | high             |         | T1          |
| P15T-MCG<br>P10N-MCG | 50  | M      | Bladder             | 95% T<br>N    | Urothelial,TCC, papillary           | n                            | high             |         | T4N1        |
| P16T-MCG<br>P9N-MCG  | 52  | M      | Bladder             | T<br>N        | Urothelial,TCC                      | n                            | low              |         | T3NO        |
| P3T-MCG              | 53  | M      | Bladder             | T             | Urothelial,TCC                      | n                            | low              |         | T3N0M0      |
| P5T-MCG              | 70  | M      | Bladder             | T             | Urothelial,TCC, papillary           | n                            | high             |         |             |
| P4T-MCG              | 70  | F      | Bladder             | 60% T         |                                     | n                            |                  |         |             |
| P6T-MCG              | 70  | F      | Bladder             | T             | Urothelial,TCC                      | n                            |                  |         |             |

**Supplementary Table S2.** Clinical characteristics of specimens used for validation of tissue-derived BCa signature

| Speciman ID | Age | Gender | Tissue ty | Diagnosis | Path Review     |
|-------------|-----|--------|-----------|-----------|-----------------|
| EU-19N      | 70  | M      | Bladder   | N         | Benign adjacent |
| EU-19T      |     |        | Bladder   | T         | Urothelial TCC  |
| EU-20N      | 73  | M      | Bladder   | N         | Benign adjacent |
| EU-20T      |     |        | Bladder   | T         | Urothelial TCC  |
| EU-22N      | 83  | M      | Bladder   | N         |                 |
| EU-22T      |     |        | Bladder   | N         | No malignancy   |
| EU-23N      | 57  | M      | Bladder   | N         | ca in-situ      |
| EU-23T      |     |        | Bladder   | T         | Urothelial TCC  |
| EU-24N      | 64  | F      | Bladder   | N         |                 |
| EU-24T      |     |        | Bladder   | N         | No malignancy   |
| EU-25N      | 75  | M      | Bladder   | N         | Benign adjacent |
| EU-25T      |     |        | Bladder   | T         | Urothelial TCC  |
| EU-26N      | 66  | m      | Bladder   | N         | Benign adjacent |
| EU-26T      |     |        | Bladder   | N         | ca in-situ      |
| EU-27N      |     |        | Bladder   | N         | Benign adjacent |
| EU-27T      |     |        | Bladder   | T         | Urothelial TCC  |
| EU-28N      |     |        | Bladder   | N         | Benign adjacent |
| EU-28T      |     |        | Bladder   | T         | Urothelial TCC  |
| EU-33N      |     |        | Bladder   | N         | Benign adjacent |
| EU-33T      |     |        | Bladder   | T         | Urothelial TCC  |
| EU-34N      |     |        | Bladder   | N         | Benign adjacent |
| EU-34T      |     |        | Bladder   | T         | Urothelial TCC  |
| EU-32N      |     |        | Bladder   | N         | Benign adjacent |
| EU-17N      | 65  | M      | Bladder   | N         | Benign adjacent |
| EU-21T      | 63  | M      | Bladder   | T         | Urothelial TCC  |
| EU-29N      |     |        | Bladder   | N         | Benign adjacent |
| EU-30T      |     |        | Bladder   | T         | Urothelial TCC  |
| EU-32T      |     |        | Bladder   | T         | Urothelial TCC  |
| EU-35N      |     |        | Bladder   | N         | Benign adjacent |
| 0059678-07  | 80  | F      | Bladder   | N         | Normal Bladder  |
| 0060504-10* | 76  | F      | Bladder   | N         | Normal Bladder  |
| 0060514-06  | 80  | M      | Bladder   | N         | Normal Bladder  |
| 0060530-03  | 61  | M      | Bladder   | N         | Normal Bladder  |
| 0060539-03  | 75  | M      | Bladder   | N         | Normal Bladder  |
| 0060684-07  | 63  | F      | Bladder   | N         | Normal Bladder  |
| 0060730-03* | 78  | M      | Bladder   | N         | Normal Bladder  |
| 0060808-03* | 85  | F      | Bladder   | N         | Normal Bladder  |
| 0060897-03  | 62  | F      | Bladder   | N         | Normal Bladder  |
| 0060910-02  | 69  | M      | Bladder   | N         | Normal Bladder  |
| 0060955-03* | 76  | M      | Bladder   | N         | Normal Bladder  |
| 0060960-04  | 32  | M      | Bladder   | N         | Normal Bladder  |
| 0061011-03  | 65  | M      | Bladder   | N         | Normal Bladder  |
| 0061030-04  | 97  | F      | Bladder   | N         | Normal Bladder  |
| 0061060-03  | 49  | F      | Bladder   | N         | Normal Bladder  |
| 0061480-02  | 17  | M      | Bladder   | N         | Normal Bladder  |
| 0065242-05  | 20  | F      | Bladder   | N         | Normal Bladder  |
| 0065337-17  | 23  | F      | Bladder   | N         | Normal Bladder  |
| 0065349-03  | 15  | F      | Bladder   | N         | Normal Bladder  |
| 0065633-04  | 13  | M      | Bladder   | N         | Normal Bladder  |
| 0065936-10  | 44  | F      | Bladder   | N         | Normal Bladder  |
| 0065963-17  | 78  | M      | Bladder   | N         | Normal Bladder  |
| 0066130-16  | 48  | F      | Bladder   | N         | Normal Bladder  |
| 0066157-10  | 41  | M      | Bladder   | N         | Normal Bladder  |

\* : predominantly fibrous tissue, N: includes both benign adjacent and normal bladder tissue, T: BCa

Supplementary Table S3. Clinical information of the urine specimens from Georgia Health Science University used in the study.

| Specimen ID | Gender | Age | Race  | Urine Diagnosis | Histology               | Init Clinical T-Stage | WHO Grade | Prior Therapy |
|-------------|--------|-----|-------|-----------------|-------------------------|-----------------------|-----------|---------------|
| VA32        | M      | 60  | Black | Bladder Cancer  | Extravesical            | T3aN0                 | High      | Chemotherapy  |
| VA33        | M      | 53  | White | Bladder Cancer  | Muscle-Invasive         | T4                    | High      | None          |
| VA34        | M      | 87  | White | Bladder Cancer  | Non-Invasive            | Ta                    | High      | None          |
| VA35        | M      | 43  | White | Bladder Cancer  | Extravesical Extension  | T4aN0                 | High      | Chemotherapy  |
| VA36        | M      | 62  | Black | Bladder Cancer  | Lamina Propria Invasive | T1                    | High      | Chemotherapy  |
| VA37        | M      | 45  | White | Bladder Cancer  | Extravesical Extension  | T4aN0                 | High      | Chemotherapy  |
| VA38        | M      | 58  | White | Bladder Cancer  | Non-Invasive            | Ta                    | Low       | None          |
| VA41        | F      | 59  | White | Control         |                         |                       |           |               |
| VA42        | M      | 66  | White | Control         |                         |                       |           |               |
| VA43        | F      | 40  | Black | Control         |                         |                       |           |               |
| VA44        | F      | 48  | White | Control         |                         |                       |           |               |
| VA45        | M      | 67  | White | Control         |                         |                       |           |               |
| VA1         | F      | 83  | Black | Bladder Cancer  | Lamina Propria invasive | T1                    | High      | None          |
| VA15        | M      | 34  | Black | Control         |                         |                       |           |               |
| VA2         | M      | 56  | White | Bladder Cancer  | Lamina Propria invasive | T1                    | High      | None          |
| VA17        | M      | 63  | White | Control         | Prostatitis,            |                       |           | None          |
| VA3         | F      | 45  | White | Bladder Cancer  | Muscle-Invasive         |                       | High      | None          |
| VA18        | F      | 43  | White | Control         |                         |                       |           |               |
| VA19        | M      | 54  | White | Control         |                         |                       |           |               |
| VA4         | M      | 57  | Black | Bladder Cancer  |                         | T3b                   | High      | None          |
| VA20        | F      | 63  | White | Control         |                         |                       |           | None          |
| VA5         | M      | 62  | White | Bladder Cancer  |                         |                       | High      | Chemotherapy  |
| VA21        | M      | 58  | White | Control         |                         |                       |           |               |
| VA22        | M      | 40  | White | Control         |                         |                       |           |               |
| VA6         | M      | 78  | White | Bladder Cancer  |                         | T2                    |           |               |
| VA23        | M      | 48  | Black | Control         |                         |                       |           |               |

**Supplementary Table S4.** Clinical information of urine specimens from University of Michigan used in this study

| Therapy administered |     |     |                                          |                           | Post Chemotherapy and TuRBT |                |                                |                        |
|----------------------|-----|-----|------------------------------------------|---------------------------|-----------------------------|----------------|--------------------------------|------------------------|
| ID                   | Sex | Age | Prior Chemotherapy                       | Prior Therapy             | Urine_cT-stage              | Urine_pT-Stage | Class Membership for the study | Urine_Cytology         |
| A1                   | M   | 65  | BCG                                      | Intravesical              | T0                          | T0             | Down-staged Benign             | Negative               |
| A2                   | F   | 73  | None                                     | None                      | T0                          | T0             | Down-staged Benign             | Atypia or negative     |
| A3                   | F   | 71  | None                                     | None                      | CIS                         | CIS            | Non-muscle invasive            | Positive               |
| A4                   | F   | 40  | None                                     | None                      | T2                          | T1             | Non-muscle invasive            | Atypia or negative     |
| C1                   | M   | 77  | PCG + Herceptin                          | Systemic                  | T4                          | T1             | Non-muscle invasive            | Suspicious or negative |
| C2                   | M   | 88  | None                                     | None                      | T3b                         | T2             | Muscle invasive                | Suspicious or negative |
| C3                   | M   | 46  | PCG                                      | Systemic                  | T3                          | T1             | Non-muscle invasive            | Positive               |
| C4                   | M   | 71  | None                                     | None                      | T2                          | T1 + CIS       | Non-muscle invasive            | Suspicious or negative |
| C5                   | M   | 52  | BCG                                      | Intravesical              | CIS                         | T1 + CIS       | Non-muscle invasive            | Positive               |
| C6                   | M   | 68  | None                                     | None                      | T1                          | CIS            | Non-muscle invasive            | Positive               |
| C7                   | M   | 45  | None                                     | None                      | T3                          | T1             | Non-muscle invasive            | Atypia or negative     |
| C8                   | M   | 67  | BCG, MMC                                 | Intravesical              | Ta                          | T0             | Down-staged Benign             | Negative               |
| D1                   | M   | 74  | Gemcitabine                              | Systemic                  | T0                          | T0             | Down-staged Benign             | Negative               |
| D2                   | F   | 92  | BCG, MMC                                 | Intravesical              | Ta                          | T0             | Down-staged Benign             | Negative               |
| D3                   | F   | 58  | Carboplatin, Paclitaxel                  | Systemic                  | T0                          | T2             | Muscle invasive                | Suspicious or negative |
| D4                   | F   | 74  | Methotrexate, Cytoxan, vincristine, 5-FU | Systemic                  | T2b                         | T2             | Muscle invasive                | Suspicious or negative |
| D5                   | F   | 77  | None                                     | None                      | T1 + CIS                    | T1 + CIS       | Non-muscle invasive            | Positive               |
| D6                   | M   | 66  | None                                     | None                      | T1 + CIS                    | T1 + CIS       | Non-muscle invasive            | Atypia or negative     |
| D7                   | M   | 74  | MVAC                                     | Systemic                  | T0                          | T0             | Down-staged Benign             | Atypia or negative     |
| D8                   | M   | 71  | Gemcitabine                              | Systemic                  | T0                          | T0             | Down-staged Benign             | Negative               |
| F1                   | M   | 61  | None                                     | None                      | T3                          | Ta             | Non-muscle invasive            | Positive               |
| F2                   | M   | 71  | MMC                                      | Intravesical              | Ta                          | T0             | Down-staged Benign             | Negative               |
| F3                   | M   | 57  | PCG                                      | Systemic                  | T3b                         | T1             | Non-muscle invasive            | Positive               |
| F4                   | M   | 69  | None                                     | None                      | T2                          | T2             | Muscle invasive                | Positive               |
| F5                   | M   | 81  | None                                     | None                      | T2                          | T2             | Muscle invasive                | Positive               |
| F6                   | M   | 87  | BCG, unknown systemic agent              | Intravesical and Systemic | T2                          | T2             | Muscle invasive                | Suspicious or negative |
| F7                   | M   | 76  | BCG                                      | Intravesical              | CIS                         | T0             | Down-staged Benign             | Negative               |
| F8                   | M   | 51  | None                                     | None                      | T2/T3a                      | T2             | Muscle invasive                | Positive               |
| G1                   | M   | 80  | BCG                                      | Intravesical              | CIS                         | Ta + CIS       | Non-muscle invasive            | Atypia or negative     |
| G2                   | M   | 74  | 5-FU, BCG, MMC                           | Intravesical and Systemic | Ta                          | T0             | Down-staged Benign             | Negative               |
| G3                   | M   | 59  | None                                     | None                      | T2                          | T2             | Muscle invasive                | Positive               |
| G4                   | M   | 55  | None                                     | None                      | T1/T2                       | T1 + CIS       | Non-muscle invasive            | Positive               |
| G5                   | M   | 78  | None                                     | None                      | T1                          | Ta             | Non-muscle invasive            | Dysplasia or negative  |
| G6                   | M   | 58  | BCG, MMC                                 | Intravesical              | Ta                          | Ta             | Non-muscle invasive            | Atypia or negative     |
| G7                   | M   | 82  | BCG                                      | Intravesical              | CIS                         | T0             | Down-staged Benign             | Positive               |
| G8                   | M   | 63  | None                                     | None                      | T2                          | T0             | Down-staged Benign             | Positive               |
| I1                   | M   | 75  | None                                     | None                      | Tx                          | CIS            | Non-muscle invasive            | Positive               |
| I2                   | F   | 41  | BCG                                      | Intravesical              | CIS                         | T0             | Down-staged Benign             | Atypia or negative     |
| I3                   | F   | 71  | BCG, INF, MVAC                           | Intravesical and Systemic | T0                          | T0             | Down-staged Benign             | Atypia or negative     |
| I4                   | M   | 51  | BCG, PCG                                 | Intravesical and Systemic | T0                          | T0             | Down-staged Benign             | Atypia or negative     |
| I5                   | M   | 63  | None                                     | None                      | T0                          | Ta             | Non-muscle invasive            | Atypia or negative     |
| I6                   | M   | 86  | BCG                                      | Intravesical              | Ta                          | Ta             | Non-muscle invasive            | Positive               |
| I7                   | M   | 61  | MMC                                      | Intravesical              | Ta HG                       | Ta             | Non-muscle invasive            | Positive               |
| I8                   | M   | 57  | BCG                                      | Intravesical              | T1                          | T0             | Down-staged Benign             | Atypia or negative     |

Abbreviations: cT: clinical staging

pT: pathological staging

Dx: diagnosis

TURBT: Trans Urethral Resection of Bladder

Table S5. Clinical information of the urine specimens used in the study from Weil Cornell Medical College

| Sample ID | Age | Urine voided cytology | Clinical stage | Grade | p53 IHC | Ki67 IHC | Diagnosis used for the study |
|-----------|-----|-----------------------|----------------|-------|---------|----------|------------------------------|
| CU1       | 88  | negative              | 0              | 0     | neg     | 0        | Benign                       |
| CU10      | 80  | negative              | 0              | 0     | neg     | 0        | Benign                       |
| CU11      | 83  | negative              | 0              | 0     |         |          | Benign                       |
| CU2       | 49  | negative              | 0              | 0     | neg     | 0        | Benign                       |
| CU25      | 62  | Positive              | Ta             | G1    | neg     | 0        | BCa                          |
| CU26      | 64  | negative              | Ta             | G1    | neg     | 0        | BCa                          |
| CU27      | 64  | negative              | Ta             | G1    | neg     | <5%      | BCa                          |
| CU28      | 77  | Positive              | Ta             | G1    | neg     | 5-10%    | BCa                          |
| CU29      | 70  | negative              | Ta             | G1    | neg     | 0        | BCa                          |
| CU3       | 74  | negative              | 0              | 0     | neg     | 20%      | Benign                       |
| CU30      | 85  | negative              | Ta             | G1    | neg     | 3-5%     | BCa                          |
| CU31      | 54  | negative              | Ta             | G1    | neg     | 3%       | BCa                          |
| CU32      | 67  | negative              | Ta             | G1    |         |          | BCa                          |
| CU33      | 65  | negative              | Ta             | G1    |         |          | BCa                          |
| CU34      | 57  | negative              | Ta             | G1    | neg     | 5%       | BCa                          |
| CU4       | 72  | negative              | 0              | 0     | neg     | 0        | Benign                       |
| CU42      | 75  | negative              | Ta             | G2    | pos     | 30%      | BCa                          |
| CU43      | 84  | Positive              | T1             | G2    | neg     | 10%      | BCa                          |
| CU44      | 79  | Positive              | Ta             | G2    | neg     | 5-10%    | BCa                          |
| CU45      | 82  | negative              | Ta             | G2    | neg     | 0        | BCa                          |
| CU46      | 76  | negative              | Ta             | G2    | neg     | 0        | BCa                          |
| CU47      | 64  | negative              | Ta             | G2    | neg     | 10%      | BCa                          |
| CU48      | 68  | negative              | Ta             | G2    | neg     | 3-5%     | BCa                          |
| CU49      | 73  | negative              | Ta             | G2    | neg     | 5%       | BCa                          |
| CU5       | 54  | negative              | 0              | 0     | neg     | 0        | Benign                       |
| CU50      | 50  | negative              | Ta             | G2    |         |          | BCa                          |
| CU6       | 63  | negative              | 0              | 0     |         |          | Benign                       |
| CU60      | 75  | negative              | T1             | G3    | pos     | 60%      | BCa                          |
| CU61      | 87  | negative              | T1             | G3    | neg     | 0        | BCa                          |
| CU62      | 82  | Positive              | T1             | G3    | neg     | 0        | BCa                          |
| CU63      | 88  | Positive              | T1             | G3    | neg     | 30%      | BCa                          |
| CU64      | 79  | Positive              | T1             | G3    | neg     | 60%      | BCa                          |
| CU65      | 80  | Positive              | T1             | G3    | neg     | 0        | BCa                          |
| CU66      | 73  | negative              | T1             | G3    | pos     | 60%      | BCa                          |
| CU67      | 71  | Positive              | T1             | G3    | neg     | 0        | BCa                          |
| CU68      | 79  | negative              | Tis            | G3    |         |          | BCa                          |
| CU7       | 64  | negative              | 0              | 0     |         |          | Benign                       |
| CU8       | 75  | negative              | 0              | 0     | neg     | 0        | Benign                       |
| CU82      | 63  | Positive              | T4             | G3    | neg     | 0        | BCa                          |
| CU83      | 54  | Positive              | T2             | G3    | pos     | 60%      | BCa                          |
| CU84      | 72  | Positive              | T2             | G3    |         |          | BCa                          |
| CU85      | 65  | Positive              | T3             | G3    |         |          | BCa                          |
| CU86      | 70  | Positive              | T2             | G3    |         |          | BCa                          |
| CU87      | 58  | negative              | T2             | G3    |         |          | BCa                          |
| CU9       | 43  | negative              | 0              | 0     | neg     | 0        | Benign                       |

**Supplementary Table S6.** Clinical information of the urine specimens used in this study from University of Texas Southwestern Medical Center

| Specimen ID | Race | Gender | Operative Procedure | Cancer Type    | Path T  | Path N | Path M | History                             | Diagnosis used in this study |
|-------------|------|--------|---------------------|----------------|---------|--------|--------|-------------------------------------|------------------------------|
| 2753        | B    | F      | Cystectomy          | TCC            | T1      | NO     | M0     | PRE-CYSTECTOMY                      | BCa                          |
| 2658        | C    | M      | Cystectomy          | Adenocarcinoma | T2a/T3a | NO     | Mx     | PRE-CYSTECTOMY                      | BCa                          |
| 2393        | C    | M      | Cystoprostatectomy  | TCC/TCIS       | T1      | NO     | Mx     | PRE-CYSTECTOMY                      | BCa                          |
| 2332        | C    | M      | TURBT               | TCC            | T1      | NX     | MX     | PRE-CYSTECTOMY                      | BCa                          |
| 2724        | B    | F      | TURBT/Biopsy        | TCC            | Ta      | NX     | MX     | PRE-TURBT                           | BCa                          |
| 2136        | C    | F      | TURBT               | TCC            | Ta      | unk    | unk    | PRE-TURBT                           | BCa                          |
| 2071        | H    | F      | TURBT/Biopsy        | TCC            | T1c     | NX     | MX     | PRE-TURBT                           | BCa                          |
| 2032        | C    | M      | TURBT               | TCC            | Ta      | NX     | MX     | PRE-TURBT                           | BCa                          |
| 2414        | C    | F      |                     |                |         |        |        | Normal                              | Benign                       |
| 2406        | C    | F      |                     |                |         |        |        | Normal                              | Benign                       |
| 2407        | C    | F      |                     |                |         |        |        | Normal                              | Benign                       |
| 2410        | B    | F      |                     |                |         |        |        | Normal                              | Benign                       |
| 2412        | C    | M      |                     |                |         |        |        | Normal                              | Benign                       |
| 2420        | C    | M      |                     |                |         |        |        | Normal (SOME TYPE OF URO DIAGNOSIS) | Benign                       |
| 2401        | C    | F      |                     |                |         |        |        | Normal (SOME TYPE OF URO DIAGNOSIS) | Benign                       |
| 2402        | Unk  | M      |                     |                |         |        |        | Normal (SOME TYPE OF URO DIAGNOSIS) | Benign                       |
| 2404        | Unk  | M      |                     |                |         |        |        | Normal (SOME TYPE OF URO DIAGNOSIS) | Benign                       |
| 2409        | C    | M      |                     |                |         |        |        | Normal (SOME TYPE OF URO DIAGNOSIS) | Benign                       |
| 2417        | C    | F      |                     |                |         |        |        | Normal (SOME TYPE OF URO DIAGNOSIS) | Benign                       |

Abbreviations: TURBT: Trans Urethral Resection of Bladder TCC: Transitional Cell Carcinoma B: Afro-American H: Hispanic C: Caucasian Unk: Unknown

Supplementary Table S7 : Summary of proportion of missingness and coefficient of variation (CV) in detection of spiked internal standards across the various profiling platforms.

| <b>Standard</b>          | <b>Platform</b> | <b>missing %</b> | <b>CV</b> |
|--------------------------|-----------------|------------------|-----------|
| GIBBERELIC ACID          | QTOF-neg        | 0.00%            | 0.01      |
| GIBBERELIC ACID          | QQQ-RP          | 0.00%            | 0.05      |
| JASMONIC ACID            | QQQ-RP          | 0.00%            | 0.10      |
| L-(15N)2-TRYPTOPHAN      | QQQ-RP          | 0.00%            | 0.02      |
| L-(15N)2-TRYPTOPHAN      | QTOF-neg        | 0.00%            | 0.02      |
| L-(15N)2-TRYPTOPHAN      | QTOF-pos        | 3.45%            | 0.02      |
| L-(D4)THYMINE            | QTOF-neg        | 0.00%            | 0.01      |
| L-(D4)THYMINE            | QQQ-RP          | 0.00%            | 0.07      |
| L[13C]-CREATININE        | QQQ-DH          | 0.00%            | 0.04      |
| L-[15N] ANTHRANILIC ACID | QTOF-neg        | 0.00%            | 0.01      |
| L-[15N] ANTHRANILIC ACID | QQQ-RP          | 0.00%            | 0.04      |
| L-[15N] ANTHRANILIC ACID | QQQ-DH          | 0.00%            | 0.12      |
| L-[15N]ARGININE          | QQQ-RP          | 0.00%            | 0.02      |
| L-[15N]ARGININE          | QQQ-DH          | 0.00%            | 0.17      |
| L-[D3]TESTOSTERONE       | QQQ-RP          | 3.45%            | 0.06      |
| L-[D4]-ESTRONE           | QTOF-pos        | 3.57%            | 0.08      |
| L-EPIBRASSINOLIDE        | QTOF-pos        | 3.57%            | 0.15      |
| ZEATINE                  | QTOF-neg        | 0.00%            | 0.01      |
| ZEATINE                  | QQQ-DH          | 0.00%            | 0.05      |
| ZEATINE                  | QTOF-pos        | 8.62%            | 0.02      |



**Supplementary Table S8.** List of SRM transitions used for targeted mass spectrometry-based examination of metabolites and isotopic standards in bladder-derived urine and tissue samples. Abbreviations: RP: reverse phase chromatography, ANP: Aqueous normal phase chromatography, +ve: positive ion mode, -ve: negative ion mode, m/z: mass : charge ratio.

| Metabolite                           | Parent ion (m/z) | Product ion (m/z) | Retention time (min) | Chromatographic method and ion mode used for detection |
|--------------------------------------|------------------|-------------------|----------------------|--------------------------------------------------------|
| Anilline                             | 94.0651          | 77.051            | 4.56                 | RP +ve                                                 |
| Serine                               | 106.0499         | 60.0451           | 2.7                  | RP +ve                                                 |
| Histamine                            | 112.0869         | 95.0608           | 3.1                  | RP +ve                                                 |
| Uracil                               | 113.0328         | 96.0082           | 3.1                  | RP +ve                                                 |
| Valine                               | 118.0863         | 72.0819           | 2.8                  | RP +ve                                                 |
| Niacinamide                          | 123.0553         | 80.04             | 3.3                  | RP +ve                                                 |
| Taurine                              | 126.0219         | 85                | 2.02                 | RP +ve                                                 |
| Thymine                              | 127.0502         | 110.024           | 3.7                  | RP +ve                                                 |
| 2-Hydroxybutyric acid sodium salt    | 127.0366         | 98.9754           | 4.7                  | RP +ve                                                 |
| Pipecolic acid                       | 130.0863         | 84.0818           | 3.39                 | RP +ve                                                 |
| Creatine                             | 132.0768         | 90.01             | 2.4                  | RP +ve                                                 |
| Leucine / Isoleucine                 | 132.1019         | 86.0969           | 4.7                  | RP +ve                                                 |
| Asparagine                           | 133.0608         | 74.01             | 2.6                  | RP +ve                                                 |
| Homocysteine                         | 136.0427         | 90                | 2.6                  | RP +ve                                                 |
| Hypoxanthine                         | 137.0458         | 119.035           | 3.3                  | RP +ve                                                 |
| Spermidine                           | 146.1652         | 72.0817           | 1.99                 | RP +ve                                                 |
| Lysine                               | 147.1128         | 84.081            | 2.1                  | RP +ve                                                 |
| Guanine                              | 152.0567         | 135.03            | 2.8                  | RP +ve                                                 |
| Histidine                            | 156.07675        | 110.071           | 2.2                  | RP +ve                                                 |
| Carnitine                            | 162.1125         | 103               | 2.4                  | RP +ve                                                 |
| Norepinephrine (noradrenaline)       | 170.0812         | 107               | 2.2                  | RP +ve                                                 |
| 1,7-dimethylxanthine                 | 181.072          | 124               | 11                   | RP +ve                                                 |
| Tyrosine                             | 182.0812         | 91.0548           | 4.06                 | RP +ve                                                 |
| Lauric acid                          | 201.1849         | 98.9758           | 16.4                 | RP +ve                                                 |
| Tryptophan                           | 205.0972         | 118.065           | 11.1                 | RP +ve                                                 |
| Kynurenine                           | 209.0921         | 191.9             | 7.8                  | RP +ve                                                 |
| 3-Hydroxykynurenine                  | 225.087          | 162.045           | 3.8                  | RP +ve                                                 |
| Palmitic acid                        | 257.2475         | 98.9758           | 16.4                 | RP +ve                                                 |
| Oleic acid                           | 283.2632         | 220.9             | 11                   | RP +ve                                                 |
| Phenylalanine                        | 166.0863         | 120.081           | 8.55                 | RP +ve                                                 |
| Pantothenic acid                     | 220.1179         | 184               | 2.95                 | RP +ve                                                 |
| Urocanic acid                        | 137.0357         | 93.04             | 2.9                  | RP -ve                                                 |
| D-Ribonolactone                      | 147.0299         | 129.02            | 2.56                 | RP -ve                                                 |
| Citramalic acid                      | 147.0299         | 87.0101           | 3.9                  | RP -ve                                                 |
| DL-3-Phenyllactic acid               | 165.0557         | 147.045           | 11.01                | RP -ve                                                 |
| 4-Hydroxy Phenyllactic acid          | 181.0506         | 135               | 11.02                | RP -ve                                                 |
| 4-Pyridoxic acid                     | 182.0459         | 138.05            | 5.5                  | RP -ve                                                 |
| 5-Hydroxyindoleacetic acid           | 190.051          | 146.06            | 10.9                 | RP -ve                                                 |
| Phthalic acid Mono-2-ethylhexylEster | 277.1455         | 134.038           | 13.3                 | RP -ve                                                 |
| Aminobutyric acid                    | 104.0706         | 69.06             | 6.2                  | ANP +ve                                                |
| Homoserine                           | 120.0855         | 74.08             | 6.8                  | ANP +ve                                                |
| Glyceraldehyde-3-phosphate           | 171.0053         | 112               | 8.6                  | ANP +ve                                                |
| Cytidine monophosphate (CMP)         | 322.0446         | 96.02             | 7.2                  | ANP +ve                                                |
| Hippuric acid                        | 180.0655         | 105               | 0.6                  | ANP +ve                                                |
| N-Acetylspermidine                   | 188.1757         | 171.05            | 9.3                  | ANP +ve                                                |
| N1-Acetylspermine                    | 245.2336         | 171.002           | 9.9                  | ANP +ve                                                |
| S-Adenosylmethionine                 | 399.1445         | 136.021           | 9.4                  | ANP +ve                                                |
| <b>Isotopic Standards</b>            |                  |                   |                      |                                                        |
| (D4)Thymine                          | 131.0753         | 113.9             | 3.7                  | RP +ve                                                 |
| L-(15N)2-Tryptophan                  | 207.0912         | 147.057           | 11.1                 | RP +ve                                                 |
| [15N] Anthranilic acid               | 139.052          | 121.04            | 3.5                  | RP +ve                                                 |
| [15N]Arginine                        | 177.113          | 116.07            | 2.2                  | RP +ve                                                 |
| Jasmonic acid                        | 211.1329         | 118.946           | 10.949               | RP +ve                                                 |
| L-[D3]Testosterone                   | 292.235          | 197.079           | 12.2                 | RP +ve                                                 |
| L- Gibberelic acid                   | 347.1489         | 180.087           | 10.8                 | RP +ve                                                 |
| L[13C]-Creatinine                    | 115.0695         | 98.9762           | 2.013                | RP +ve                                                 |
| L-[D4]-Estrone                       | 275.1944         | 131.001           | 11.991               | RP +ve                                                 |
| L-Zeatine                            | 220.1193         | 136               | 2.115                | RP +ve                                                 |
| L-( D3)-N-Acetyl Aspartic acid       | 177.0596         | 90.8              | 2.8                  | RP -ve                                                 |
| L-(D5)-Glutamic acid                 | 151.0773         | 107.1             | 2.2                  | RP -ve                                                 |
| L-(15N)2-Tryptophan                  | 205.0767         | 117               | 11                   | RP -ve                                                 |
| L- Gibberelic acid                   | 345.1344         | 143               | 10.8                 | RP -ve                                                 |
| L-anthranilic acid                   | 137.0374         | 93                | 3.5                  | RP -ve                                                 |
| L-(D4)Thymine                        | 131.0753         | 113.9             | 7.3                  | ANP +ve                                                |
| L-(15N)2-Tryptophan                  | 207.0912         | 189               | 5.2                  | ANP +ve                                                |
| L-[15N] Anthranilic acid             | 139.052          | 121               | 0.6                  | ANP +ve                                                |
| L[15C]-Creatinine                    | 115.0695         | 99                | 9.5                  | ANP +ve                                                |
| L-[15N]Arginine                      | 177.113          | 116               | 9.1                  | ANP +ve                                                |

**Supplementary Table S9:** List of all compounds detected in bladder-derived tissues in the profiling study. For each compound the method of detection (Source) is indicated. POS and NEG represent positive and negative ionization modes on the Q-TOF while QQQ RP and QQQ DH signify compounds detected using reverse phase and normal phase separation coupled to a triple quadrupole mass spectrometer. Also for each compound the Z-normalized value, regulation, p-value and the q-value are described

| CPDname                           | Source | Z-score  | Regulation | pvalue   | FDR-qvalue |
|-----------------------------------|--------|----------|------------|----------|------------|
| 1,7-dimethylxanthine              | POS    | -2.47763 | DOWN       | 0.011905 | 0.068814   |
| 100.0168@0.57277274               | NEG    | -1.41516 | DOWN       | 0.158845 | 0.312488   |
| 103.0336@0.28384486               | POS    | -3.51581 | DOWN       | 0.00023  | 0          |
| 113.0927@2.5536594                | POS    | 1.566165 | UP         | 0.11817  | 0.276383   |
| 117.0803@3.9238045                | POS    | -1.4463  | DOWN       | 0.14971  | 0.305346   |
| 129.045@0.59635705                | POS    | 1.572584 | UP         | 0.116636 | 0.264513   |
| 132.0269@0.2923104                | POS    | -1.47839 | DOWN       | 0.140713 | 0.291296   |
| 134.1@2.4993749                   | POS    | -0.0872  | DOWN       | 0.931431 | 0.684015   |
| 158.0581@3.3400626                | POS    | -0.46548 | DOWN       | 0.645687 | 0.579202   |
| 187.0651@2.281147                 | POS    | -0.08284 | DOWN       | 0.93485  | 0.683806   |
|                                   | QQQ-   |          |            |          |            |
| 1-Methyl-L-tryptophan             | RP     | 0.75365  | UP         | 0.45594  | 0.524434   |
| 216.0889@1.8678421                | NEG    | -3.85558 | DOWN       | 4.21E-05 | 0          |
| 235.1432@0.7777501                | POS    | 1.077889 | UP         | 0.285015 | 0.424139   |
| 256.1404@5.1234703                | POS    | -0.12051 | DOWN       | 0.905336 | 0.663611   |
| 262.1364@2.3729749                | POS    | -1.78033 | DOWN       | 0.074748 | 0.210335   |
| 276.1718@9.966183                 | NEG    | 0.691061 | UP         | 0.49438  | 0.532073   |
| 2-Hydroxy caprylic acid           | NEG    | 0.662016 | UP         | 0.512775 | 0.53486    |
|                                   | QQQ-   |          |            |          |            |
| 2-Hydroxybutyric acid sodium salt | RP     | -2.84501 | DOWN       | 0.003549 | 0.027763   |
| 2-Methylglutaric acid             | NEG    | -0.6462  | DOWN       | 0.522936 | 0.552695   |
| 2-Phenylacetamide                 | NEG    | 1.57586  | UP         | 0.115859 | 0.273169   |
| 366.1443@1.6363891                | POS    | -1.20688 | DOWN       | 0.230666 | 0.384441   |
| 3-Deoxyguanosie                   | NEG    | -0.35303 | DOWN       | 0.727424 | 0.627761   |
| 3-Hydroxy-2-methylvalerate        | NEG    | 0.248875 | UP         | 0.805953 | 0.650979   |
| 3-hydroxy-3-methyl-Glutaric acid  | NEG    | -0.10997 | DOWN       | 0.91358  | 0.679567   |
|                                   | QQQ-   |          |            |          |            |
| 3-Hydroxykynurenine               | RP     | 3.213507 | UP         | 0.000865 | 0.005943   |
| 410.1731@1.3699316                | NEG    | 2.457164 | UP         | 0.012669 | 0.068225   |
| 438.1979@5.5332                   | POS    | 0.32673  | UP         | 0.747029 | 0.637757   |
| 4-Hydroxy Phenyllacticacid        | NEG    | 3.258845 | UP         | 0.000717 | 0.007706   |
| 4-Isopropylbenzyl alcohol         | POS    | 0.175039 | UP         | 0.86285  | 0.667356   |
| 4-Pyridoxic acid                  | NEG    | -1.74836 | DOWN       | 0.080273 | 0.216259   |
| 530.2662@9.085779                 | POS    | 1.865957 | UP         | 0.061427 | 0.197597   |
| 5-Hydroxyindoleaceticacid         | POS    | 2.497757 | UP         | 0.011194 | 0.060604   |

|                        |     |          |      |          |          |
|------------------------|-----|----------|------|----------|----------|
| 60.0228@0.30110717     | POS | -2.88958 | DOWN | 0.003025 | 0.021365 |
| 60.0235@0.16182351     | POS | -1.21325 | DOWN | 0.228182 | 0.371607 |
| 60.0236@0.079937495    | POS | -1.27071 | DOWN | 0.206613 | 0.357578 |
| 64.0398@2.5860255      | POS | -1.34465 | DOWN | 0.18103  | 0.333824 |
| 64.9988@0.27988        | POS | 3.438897 | UP   | 0.000327 | 0.005021 |
| 6-hydroxy caproic acid | POS | 1.090851 | UP   | 0.279202 | 0.41427  |
| 70.0287@4.2837         | NEG | -1.25428 | DOWN | 0.212627 | 0.365566 |
| 72.015@0.28444737      | POS | 2.059957 | UP   | 0.038246 | 0.13427  |
| 750.3672@4.1218805     | POS | 2.418129 | UP   | 0.014242 | 0.072497 |
| 753.4114@12.266687     | POS | 0.727025 | UP   | 0.472089 | 0.523534 |
| 754.3449@11.782734     | POS | 0.545916 | UP   | 0.589609 | 0.584244 |
| 754.3457@11.340474     | POS | 1.105374 | UP   | 0.272782 | 0.417586 |
| 754.4003@3.386621      | POS | -0.27518 | DOWN | 0.785908 | 0.647894 |
| 755.3575@5.2760997     | POS | 2.731389 | UP   | 0.005263 | 0.029321 |
| 756.3404@6.889419      | NEG | -1.74815 | DOWN | 0.080312 | 0.220893 |
| 756.3645@11.795263     | NEG | -0.19673 | DOWN | 0.846052 | 0.662529 |
| 757.3563@3.2076316     | POS | 0.606486 | UP   | 0.548883 | 0.559788 |
| 758.36@12.2238         | POS | 0.266415 | UP   | 0.792571 | 0.647606 |
| 759.4142@11.160056     | POS | -0.45501 | DOWN | 0.653139 | 0.603074 |
| 760.3736@4.7362        | NEG | 1.49648  | UP   | 0.135822 | 0.294671 |
| 760.3773@4.720982      | POS | -2.75502 | DOWN | 0.004856 | 0.032264 |
| 764.3584@3.9436092     | NEG | 2.264285 | UP   | 0.02218  | 0.096279 |
| 764.3633@3.9458647     | POS | -0.35054 | DOWN | 0.729278 | 0.629364 |
| 764.4118@11.392766     | POS | -0.7231  | DOWN | 0.474494 | 0.529111 |
| 766.3585@2.5847504     | POS | 0.494106 | UP   | 0.625482 | 0.590962 |
| 767.4206@11.839601     | POS | 0.966743 | UP   | 0.338109 | 0.465834 |
| 768.3646@2.8198273     | POS | 2.424536 | UP   | 0.013973 | 0.06486  |
| 770.4133@4.5698066     | POS | 2.628312 | UP   | 0.007409 | 0.05261  |
| 771.3677@4.721745      | POS | -2.75062 | DOWN | 0.00493  | 0.034108 |
| 771.3892@5.867258      | POS | 2.418864 | UP   | 0.014211 | 0.07167  |
| 771.4048@4.3835006     | POS | 0.176568 | UP   | 0.861663 | 0.666918 |
| 772.3724@2.5775266     | POS | 2.85242  | UP   | 0.003457 | 0.028289 |
| 775.4246@12.276001     | POS | -0.12361 | DOWN | 0.902915 | 0.677357 |
| 776.4163@9.0227995     | POS | 0.807471 | UP   | 0.42424  | 0.507476 |
| 777.3656@2.9937139     | POS | 1.525663 | UP   | 0.128203 | 0.28553  |
| 779.3512@4.735277      | POS | 1.366862 | UP   | 0.173813 | 0.324522 |
| 780.4218@12.024667     | POS | -0.28874 | DOWN | 0.775624 | 0.646099 |
| 781.4279@11.185354     | POS | -2.1957  | DOWN | 0.026775 | 0.116483 |
| 782.3542@5.7417016     | POS | 0.333781 | UP   | 0.741757 | 0.632623 |
| 782.3774@11.816346     | POS | 0.575707 | UP   | 0.569408 | 0.573235 |
| 783.3722@4.8025913     | POS | 0.77216  | UP   | 0.444894 | 0.510571 |
| 784.4052@7.1533523     | POS | 0.163371 | UP   | 0.871913 | 0.669958 |
| 786.3864@3.2027922     | POS | 0.594914 | UP   | 0.556558 | 0.563184 |

|                    |     |          |      |          |          |
|--------------------|-----|----------|------|----------|----------|
| 787.4301@8.905766  | POS | -0.24187 | DOWN | 0.811315 | 0.650355 |
| 788.4072@7.10579   | POS | 1.801314 | UP   | 0.071288 | 0.198796 |
| 792.4273@10.432442 | POS | 0.020128 | UP   | 0.984153 | 0.6954   |
| 794.4366@9.206     | POS | -0.78253 | DOWN | 0.438774 | 0.514477 |
| 796.419@8.471875   | POS | 3.185356 | UP   | 0.000971 | 0.01186  |
| 799.4053@6.667     | POS | 4.043444 | UP   | 1.48E-05 | 0        |
| 807.3766@3.445722  | POS | 2.985551 | UP   | 0.002124 | 0.017926 |
| 808.437@11.431645  | POS | -0.50193 | DOWN | 0.620008 | 0.588813 |
| 809.4439@8.9874    | POS | -0.21109 | DOWN | 0.834964 | 0.654897 |
| 810.3831@1.6731874 | NEG | -0.14152 | DOWN | 0.888929 | 0.675899 |
| 810.3948@6.664263  | POS | 3.313632 | UP   | 0.000568 | 0.009476 |
| 814.4125@4.7368827 | POS | -0.59063 | DOWN | 0.559411 | 0.565522 |
| 817.3772@4.0255003 | NEG | 2.888038 | UP   | 0.003042 | 0.022902 |
| 817.4288@6.576334  | POS | 1.847713 | UP   | 0.064091 | 0.181386 |
| 82.0739@0.30744445 | POS | 1.916807 | UP   | 0.054468 | 0.174604 |
| 820.3976@4.80545   | POS | 0.896604 | UP   | 0.374597 | 0.473371 |
| 820.444@9.145      | POS | 1.065526 | UP   | 0.290633 | 0.429559 |
| 824.4478@12.023251 | POS | 0.019307 | UP   | 0.9848   | 0.696217 |
| 828.4201@6.5789104 | POS | 0.689348 | UP   | 0.495456 | 0.533614 |
| 828.4321@7.3547106 | POS | 0.420987 | UP   | 0.677598 | 0.611214 |
| 831.3913@4.8034396 | POS | -1.55578 | DOWN | 0.120683 | 0.262079 |
| 833.4346@4.7315555 | POS | 2.009576 | UP   | 0.043426 | 0.149409 |
| 834.3874@2.8491783 | POS | 2.376785 | UP   | 0.016089 | 0.084366 |
| 836.3847@9.701072  | POS | -0.94625 | DOWN | 0.348531 | 0.461799 |
| 836.4537@10.526853 | POS | -0.77046 | DOWN | 0.445903 | 0.514295 |
| 847.3903@5.328473  | NEG | -0.78371 | DOWN | 0.438076 | 0.50514  |
| 847.3956@5.295215  | POS | 0.164204 | UP   | 0.871265 | 0.668687 |
| 850.4431@10.510401 | NEG | -0.16828 | DOWN | 0.868098 | 0.669476 |
| 852.4589@12.496999 | POS | -0.55027 | DOWN | 0.586635 | 0.580597 |
| 852.4636@11.468491 | POS | -0.66678 | DOWN | 0.509735 | 0.541356 |
| 854.4027@5.578471  | POS | 1.674535 | UP   | 0.094268 | 0.229076 |
| 858.4429@3.6281762 | POS | 0.166322 | UP   | 0.869619 | 0.663374 |
| 859.4417@5.863267  | POS | 2.357944 | UP   | 0.016996 | 0.067927 |
| 864.4693@9.250286  | POS | 2.398025 | UP   | 0.015116 | 0.072497 |
| 868.4733@12.065002 | POS | 0.272461 | UP   | 0.787972 | 0.650412 |
| 872.4588@7.5399413 | POS | -1.1331  | DOWN | 0.260803 | 0.404126 |
| 880.4797@10.596551 | POS | -0.93553 | DOWN | 0.354061 | 0.467673 |
| 900.4261@6.876948  | NEG | 0.35709  | UP   | 0.724414 | 0.62731  |
| 900.4367@3.8994994 | POS | 1.899909 | UP   | 0.056706 | 0.177209 |
| 903.4604@2.8666189 | POS | 1.005911 | UP   | 0.318734 | 0.442637 |
| 916.475@9.699421   | POS | -0.6699  | DOWN | 0.507746 | 0.542348 |
| 920.4598@10.184614 | POS | 0.043944 | UP   | 0.965412 | 0.691535 |
| 922.4924@9.710158  | POS | -2.62888 | DOWN | 0.007395 | 0.046308 |

|                              |      |          |      |          |          |
|------------------------------|------|----------|------|----------|----------|
| 924.4625@4.148               | POS  | -2.1768  | DOWN | 0.028174 | 0.104895 |
| 94.0787@9.358134             | POS  | 0.927352 | UP   | 0.358319 | 0.470427 |
| 992.4871@3.8786316           | POS  | 1.367303 | UP   | 0.173671 | 0.331032 |
|                              | QQQ- |          |      |          |          |
| Adenine                      | RP   | -1.2716  | DOWN | 0.206289 | 0.352375 |
|                              | QQQ- |          |      |          |          |
| Adenosine                    | RP   | -0.59654 | DOWN | 0.555477 | 0.563627 |
|                              | QQQ- |          |      |          |          |
| Alanine                      | DH   | -2.7058  | DOWN | 0.005737 | 0.03794  |
| Allose                       | NEG  | -0.20189 | DOWN | 0.84206  | 0.661813 |
| alpha-hydroxyisobutyric acid | NEG  | 1.322293 | UP   | 0.188511 | 0.344273 |
|                              | QQQ- |          |      |          |          |
| Aminobutyric acid            | DH   | 1.657539 | UP   | 0.097744 | 0.242361 |
| Aniline                      | POS  | 3.202885 | UP   | 0.000904 | 0.009476 |
| Arginine                     | POS  | 1.553339 | UP   | 0.12128  | 0.276029 |
|                              | QQQ- |          |      |          |          |
| Arginine                     | RP   | 0.695409 | UP   | 0.491657 | 0.537678 |
|                              | QQQ- |          |      |          |          |
| Asparagine                   | RP   | 2.767327 | UP   | 0.004656 | 0.013969 |
|                              | QQQ- |          |      |          |          |
| Aspartic Acid                | RP   | -0.55613 | DOWN | 0.58265  | 0.580556 |
| Atenolol                     | POS  | -0.80824 | DOWN | 0.423794 | 0.504996 |
| Avobenzene                   | NEG  | -0.5282  | DOWN | 0.601775 | 0.583278 |
| Benzoic acid                 | NEG  | -0.9842  | DOWN | 0.329384 | 0.451682 |
| Benzyl alcohol               | NEG  | -0.75164 | DOWN | 0.457148 | 0.520628 |
|                              | QQQ- |          |      |          |          |
| Betaine                      | DH   | 0.616296 | UP   | 0.542416 | 0.555238 |
| b-Hydroxyisovaleric acid     | NEG  | 0.479821 | UP   | 0.635532 | 0.60245  |
| C10 H10 O2                   | POS  | 1.09915  | UP   | 0.275521 | 0.410729 |
| C10 H11 N5                   | POS  | -0.44506 | DOWN | 0.660258 | 0.608455 |
| C10 H13 N                    | POS  | 0.571383 | UP   | 0.572321 | 0.572004 |
| C10 H13 N O3                 | POS  | -1.86955 | DOWN | 0.060913 | 0.181564 |
| C10 H13 N5 O                 | POS  | -0.59065 | DOWN | 0.559396 | 0.56631  |
| C10 H13 N5 O                 | NEG  | 0.424664 | UP   | 0.674938 | 0.610299 |
| C10 H13 N7                   | POS  | -0.03482 | DOWN | 0.972591 | 0.693556 |
| C10 H14 Cl N5 O              | NEG  | -1.55239 | DOWN | 0.121512 | 0.274128 |
| C10 H14 N2                   | POS  | -1.01118 | DOWN | 0.316181 | 0.445102 |
| C10 H14 N2 O                 | POS  | 1.450961 | UP   | 0.148378 | 0.302822 |
| C10 H14 N2 O2 S              | POS  | 0.039451 | UP   | 0.968947 | 0.690492 |
| C10 H14 N8 O3                | NEG  | 4.469099 | UP   | 9.88E-07 | 0        |
| C10 H14 O4                   | NEG  | 1.102585 | UP   | 0.274007 | 0.413221 |
| C10 H15 N O                  | POS  | 0.730115 | UP   | 0.4702   | 0.5266   |
| C10 H15 N3                   | POS  | -1.8051  | DOWN | 0.070677 | 0.206158 |
| C10 H15 N9                   | POS  | -0.63898 | DOWN | 0.527607 | 0.548281 |

|                           |     |          |      |          |          |
|---------------------------|-----|----------|------|----------|----------|
| C10 H16 N8                | NEG | -0.76788 | DOWN | 0.447434 | 0.519443 |
| C10 H16 N8 O5             | POS | 2.917362 | UP   | 0.002735 | 0.02339  |
| C10 H18 N2 O S            | POS | -0.03333 | DOWN | 0.97376  | 0.693512 |
| C10 H18 N2 O4 S           | POS | 0.210442 | UP   | 0.835464 | 0.657643 |
| C10 H18 N4 O2             | POS | -0.33653 | DOWN | 0.739701 | 0.630953 |
| C10 H18 N6 O2             | POS | 0.611674 | UP   | 0.545458 | 0.551857 |
| C10 H18 O5                | NEG | 0.089412 | UP   | 0.929692 | 0.682546 |
| C10 H19 N O S2            | POS | 0.324157 | UP   | 0.748955 | 0.634837 |
| C10 H19 N O3              | POS | 0.564657 | UP   | 0.576864 | 0.572429 |
| C10 H19 N3 O S - 4.273033 | NEG | -1.63109 | DOWN | 0.10335  | 0.258425 |
| C10 H19 N5 O5             | POS | -1.84225 | DOWN | 0.064908 | 0.182809 |
| C10 H19 N7 O              | POS | -0.41152 | DOWN | 0.684465 | 0.614971 |
| C10 H20 N2 O3 S           | POS | 1.099395 | UP   | 0.275413 | 0.417062 |
| C10 H20 N2 O4 - 0.9845834 | NEG | -2.54357 | DOWN | 0.009709 | 0.054898 |
| C10 H20 N2 O4 + 1.0626875 | POS | 1.161963 | UP   | 0.248712 | 0.396901 |
| C10 H20 N2 O4 S           | POS | -1.19328 | DOWN | 0.236031 | 0.384124 |
| C10 H20 N2 O6             | POS | 0.488277 | UP   | 0.629575 | 0.595575 |
| C10 H20 N4 O S            | NEG | 1.606274 | UP   | 0.108836 | 0.256567 |
| C10 H20 N4 S + 1.3510385  | POS | -2.71586 | DOWN | 0.005547 | 0.035514 |
| C10 H21 N3 O9             | POS | 3.407869 | UP   | 0.000376 | 0.003989 |
| C10 H22 O4 S              | NEG | 2.412587 | UP   | 0.014479 | 0.066108 |
| C10 H23 Cl N14 O          | POS | 0.353022 | UP   | 0.727432 | 0.628404 |
| C10 H23 Cl N4 O S         | POS | -2.03678 | DOWN | 0.040562 | 0.140855 |
| C10 H23 N O3 S            | POS | -0.75721 | DOWN | 0.453802 | 0.521501 |
| C10 H23 N9 O S            | POS | -1.74207 | DOWN | 0.081399 | 0.217917 |
| C10 H24 N2 O5 S           | NEG | -0.98887 | DOWN | 0.327074 | 0.444638 |
| C10 H24 N4 O S2           | POS | 0.50355  | UP   | 0.618875 | 0.590417 |
| C10 H24 N4 O6 S           | NEG | 5.366719 | UP   | 4.06E-10 | 0        |
| C10 H24 N6 O S            | POS | -1.7962  | DOWN | 0.072119 | 0.201162 |
| C10 H25 Cl N8 O2          | NEG | -0.31492 | DOWN | 0.755887 | 0.635887 |
| C10 H25 N9 O5 + 10.031215 | POS | -0.30578 | DOWN | 0.762761 | 0.637818 |
| C10 H26 N10 O S           | POS | 0.990049 | UP   | 0.326493 | 0.456931 |
| C10 H26 N10 O2 S          | POS | -2.48261 | DOWN | 0.011726 | 0.061948 |
| C10 H30 N10 O2 S2         | POS | -0.08813 | DOWN | 0.930697 | 0.683991 |
| C10 H6 N6                 | NEG | -0.11686 | DOWN | 0.90819  | 0.677695 |
| C10 H9 N5                 | POS | -1.2729  | DOWN | 0.205818 | 0.358272 |
| C10 H9 N5                 | NEG | -0.6063  | DOWN | 0.549004 | 0.558251 |
| C11 H12                   | NEG | -2.70757 | DOWN | 0.005703 | 0.031308 |
| C11 H12 N10               | POS | 1.475775 | UP   | 0.141431 | 0.28806  |
| C11 H12 N2 O2             | NEG | -0.54535 | DOWN | 0.589993 | 0.578543 |
| C11 H12 N2 O2 + 4.1904817 | POS | -0.26939 | DOWN | 0.790305 | 0.648153 |
| C11 H12 O S               | POS | 3.425231 | UP   | 0.000348 | 0        |
| C11 H12 O2                | POS | -0.1908  | DOWN | 0.850639 | 0.664372 |

|                            |     |          |      |          |          |
|----------------------------|-----|----------|------|----------|----------|
| C11 H14 N6 O2              | POS | 0.260296 | UP   | 0.797233 | 0.649186 |
| C11 H14 O3                 | NEG | -1.44462 | DOWN | 0.150192 | 0.286636 |
| C11 H15 Cl N2 O2           | POS | -2.26861 | DOWN | 0.021914 | 0.082743 |
| C11 H15 N O5               | POS | -1.78971 | DOWN | 0.073185 | 0.180128 |
| C11 H15 N13 O2             | POS | 0.253599 | UP   | 0.802343 | 0.652444 |
| C11 H15 N3 O3              | NEG | -0.71366 | DOWN | 0.480312 | 0.52936  |
| C11 H15 N3 O4              | POS | 0.414584 | UP   | 0.682239 | 0.613554 |
| C11 H15 N5                 | POS | -0.29051 | DOWN | 0.774282 | 0.643164 |
| C11 H15 N9                 | POS | 0.094294 | UP   | 0.925863 | 0.68362  |
| C11 H16 N4                 | POS | -2.44878 | DOWN | 0.012994 | 0.06852  |
| C11 H16 N8 O4              | NEG | 0.516807 | UP   | 0.609651 | 0.584685 |
| C11 H16 O                  | NEG | 1.813747 | UP   | 0.069299 | 0.206334 |
| C11 H17 N3 O4              | POS | 0.033324 | UP   | 0.973767 | 0.693534 |
| C11 H17 N5 O4              | POS | -0.48099 | DOWN | 0.634707 | 0.596788 |
| C11 H18 Cl N3              | POS | -2.57617 | DOWN | 0.00876  | 0.049918 |
| C11 H18 N10 O              | NEG | 1.052692 | UP   | 0.296541 | 0.427261 |
| C11 H18 N2 O2 S            | NEG | -0.58239 | DOWN | 0.564922 | 0.574879 |
| C11 H18 N2 O4              | NEG | 1.797974 | UP   | 0.07183  | 0.202064 |
| C11 H18 N8 O2              | NEG | -2.21331 | DOWN | 0.025525 | 0.090024 |
| C11 H18 O3 S               | POS | -1.26543 | DOWN | 0.208531 | 0.362719 |
| C11 H19 N3 O6              | POS | -0.53281 | DOWN | 0.598596 | 0.582266 |
| C11 H19 N9 O S             | POS | -1.64139 | DOWN | 0.10114  | 0.242941 |
| C11 H20 N2 O3              | POS | 2.695089 | UP   | 0.005947 | 0.033655 |
| C11 H20 N2 O4              | POS | -0.57458 | DOWN | 0.570168 | 0.566921 |
| C11 H20 N2 O5 - 0.72262496 | NEG | 3.990474 | UP   | 2.00E-05 | 0        |
| C11 H20 N6 O2              | POS | -2.712   | DOWN | 0.005619 | 0.032734 |
| C11 H20 N6 O2 S            | POS | 0.695148 | UP   | 0.49182  | 0.530558 |
| C11 H21 Cl N8              | NEG | 1.650681 | UP   | 0.099175 | 0.244383 |
| C11 H21 Cl O3              | POS | -2.53019 | DOWN | 0.010124 | 0.060263 |
| C11 H21 N O5               | POS | 3.987875 | UP   | 2.03E-05 | 0        |
| C11 H21 N5 O3              | POS | -3.61534 | DOWN | 0.000143 | 0.00158  |
| C11 H21 N7 S2              | POS | 2.048264 | UP   | 0.0394   | 0.135429 |
| C11 H22 N2 O2 S            | POS | 2.268661 | UP   | 0.021911 | 0.093047 |
| C11 H22 N2 O3 S            | POS | -1.64623 | DOWN | 0.100111 | 0.248076 |
| C11 H22 N2 O4 S            | NEG | -3.0938  | DOWN | 0.001401 | 0.013293 |
| C11 H22 N2 O6 S            | NEG | 0.088799 | UP   | 0.930173 | 0.683852 |
| C11 H22 N2 O9              | POS | -0.7378  | DOWN | 0.465517 | 0.521501 |
| C11 H22 O S                | POS | 3.364495 | UP   | 0.000456 | 0.005021 |
| C11 H22 S2 + 5.079705      | POS | 0.450821 | UP   | 0.656135 | 0.604932 |
| C11 H23 N5 O6              | NEG | 0.769235 | UP   | 0.44663  | 0.516687 |
| C11 H24 Cl N9 O2           | NEG | 0.894527 | UP   | 0.375713 | 0.480781 |
| C11 H24 N10 O S            | NEG | 0.347897 | UP   | 0.731238 | 0.631207 |
| C11 H24 N2 O3 S2           | POS | -0.01251 | DOWN | 0.990149 | 0.696987 |

|                        |     |          |      |          |          |
|------------------------|-----|----------|------|----------|----------|
| C11 H24 N8 O S         | NEG | 1.865506 | UP   | 0.061492 | 0.184393 |
| C11 H25 Cl N4 O S      | NEG | 0.201214 | UP   | 0.842585 | 0.660961 |
| C11 H26 N2 O4 S        | POS | 0.377451 | UP   | 0.709378 | 0.626566 |
| C11 H27 N13 S2         | POS | 0.584013 | UP   | 0.563835 | 0.564951 |
| C11 H27 N3 O7          | POS | 0.572749 | UP   | 0.5714   | 0.568614 |
| C11 H27 N3 S2          | POS | -1.64639 | DOWN | 0.100079 | 0.260393 |
| C11 H27 N5 O2 S2       | POS | 1.862258 | UP   | 0.06196  | 0.18986  |
| C11 H27 N9 O2 S        | POS | 1.232669 | UP   | 0.220724 | 0.383966 |
| C11 H28 Cl N5 O5       | POS | -0.0962  | DOWN | 0.92437  | 0.680874 |
| C11 H28 Cl N9 O3       | POS | -1.61074 | DOWN | 0.107832 | 0.258821 |
| C11 H28 Cl2 N6 O2      | POS | 0.985311 | UP   | 0.328834 | 0.449944 |
| C11 H28 N10 O2 S       | POS | -2.63766 | DOWN | 0.007187 | 0.039348 |
| C11 H29 N13 O S2       | NEG | -1.50277 | DOWN | 0.134153 | 0.287295 |
| C11 H29 N9 O2 S2       | POS | 1.427564 | UP   | 0.155159 | 0.309209 |
| C11 H32 N10 O4 S2      | POS | -0.12165 | DOWN | 0.904448 | 0.67873  |
| C11 H6                 | NEG | -0.81722 | DOWN | 0.418635 | 0.508231 |
| C11 H9 N O2            | POS | -1.38224 | DOWN | 0.168939 | 0.329239 |
| C12 H10                | POS | -0.65621 | DOWN | 0.516494 | 0.547854 |
| C12 H10 N4             | POS | -0.54363 | DOWN | 0.591171 | 0.577799 |
| C12 H12 N2 O           | POS | -0.41141 | DOWN | 0.684544 | 0.614661 |
| C12 H12 O3             | POS | -1.77582 | DOWN | 0.075509 | 0.212898 |
| C12 H12 O3             | NEG | -0.48079 | DOWN | 0.634848 | 0.594928 |
| C12 H12 O4             | POS | 0.785168 | UP   | 0.437221 | 0.513109 |
| C12 H13 N O2           | POS | -0.71618 | DOWN | 0.478753 | 0.526558 |
| C12 H14 N4             | POS | -0.6474  | DOWN | 0.522163 | 0.551296 |
| C12 H14 N6 + 3.0640671 | POS | -0.72895 | DOWN | 0.470914 | 0.527902 |
| C12 H15 N O2           | POS | -2.20563 | DOWN | 0.026065 | 0.098002 |
| C12 H15 N5 S           | POS | -1.01776 | DOWN | 0.313015 | 0.435751 |
| C12 H16 N2             | NEG | -0.64901 | DOWN | 0.521125 | 0.54866  |
| C12 H16 N2 O3          | POS | 0.593213 | UP   | 0.557691 | 0.564113 |
| C12 H16 N2 O4          | POS | 1.047745 | UP   | 0.298839 | 0.43436  |
| C12 H16 O2 S           | POS | -0.07632 | DOWN | 0.93997  | 0.687094 |
| C12 H16 O3             | POS | -1.21603 | DOWN | 0.227105 | 0.370723 |
| C12 H16 O3             | NEG | -1.76261 | DOWN | 0.077773 | 0.21709  |
| C12 H16 O4             | POS | -2.0308  | DOWN | 0.041177 | 0.144347 |
| C12 H16 O4 - 4.2537827 | NEG | -0.30118 | DOWN | 0.766229 | 0.638882 |
| C12 H16 O5             | NEG | -2.04757 | DOWN | 0.039469 | 0.144347 |
| C12 H17 Cl N2          | POS | 0.284983 | UP   | 0.778469 | 0.642066 |
| C12 H17 Cl O2          | POS | -1.20739 | DOWN | 0.230468 | 0.38452  |
| C12 H17 N O4           | POS | 0.803672 | UP   | 0.426435 | 0.504515 |
| C12 H17 N5             | POS | 4.145168 | UP   | 8.09E-06 | 0        |
| C12 H17 N7             | POS | -2.02625 | DOWN | 0.041651 | 0.145845 |
| C12 H18 N10            | POS | -0.90785 | DOWN | 0.368593 | 0.476269 |



|                           |     |          |      |          |          |
|---------------------------|-----|----------|------|----------|----------|
| C12 H18 N2 O              | POS | 1.350634 | UP   | 0.179065 | 0.330844 |
| C12 H18 N8 O5             | POS | 0.463963 | UP   | 0.646765 | 0.596561 |
| C12 H18 O2 S              | POS | 0.474059 | UP   | 0.639604 | 0.60234  |
| C12 H18 O3                | POS | -0.19545 | DOWN | 0.847037 | 0.665234 |
| C12 H19 Cl O3             | NEG | 0.420607 | UP   | 0.677873 | 0.609202 |
| C12 H19 N O3              | POS | -0.69558 | DOWN | 0.49155  | 0.540073 |
| C12 H19 N11 O             | POS | 0.232994 | UP   | 0.818117 | 0.655174 |
| C12 H20 N16 O             | POS | -1.56251 | DOWN | 0.11905  | 0.276619 |
| C12 H20 N16 S             | NEG | 1.276812 | UP   | 0.204409 | 0.352196 |
| C12 H20 N2 O S2 + 9.56347 | POS | -1.96201 | DOWN | 0.048832 | 0.138847 |
| C12 H20 N2 O3             | POS | -0.23027 | DOWN | 0.820207 | 0.65534  |
| C12 H20 N2 O4             | NEG | 0.673329 | UP   | 0.505569 | 0.540882 |
| C12 H20 N2 O6             | POS | -0.84303 | DOWN | 0.404004 | 0.497638 |
| C12 H20 O3                | POS | -0.01143 | DOWN | 0.990999 | 0.696923 |
| C12 H20 O5 - 6.208647     | NEG | -1.24817 | DOWN | 0.214896 | 0.360766 |
| C12 H21 N O3              | POS | -0.41188 | DOWN | 0.684204 | 0.616344 |
| C12 H21 N7 O2             | POS | -0.56103 | DOWN | 0.579319 | 0.575466 |
| C12 H22 N14 O             | NEG | -0.75981 | DOWN | 0.452248 | 0.515789 |
| C12 H22 N2 O3 S           | POS | 1.600486 | UP   | 0.110147 | 0.260132 |
| C12 H22 N2 O4             | NEG | -0.13693 | DOWN | 0.892506 | 0.674551 |
| C12 H23 N O2 S            | NEG | -1.82023 | DOWN | 0.06828  | 0.197253 |
| C12 H23 N O6              | POS | -0.61927 | DOWN | 0.540464 | 0.555468 |
| C12 H23 N O8              | NEG | 1.129541 | UP   | 0.26232  | 0.404963 |
| C12 H24 Cl N5             | POS | -0.66424 | DOWN | 0.511353 | 0.542537 |
| C12 H24 N14 O2            | POS | 0.202897 | UP   | 0.841285 | 0.662026 |
| C12 H24 N2 O S2           | POS | 1.786271 | UP   | 0.073755 | 0.215425 |
| C12 H24 N2 O5             | POS | 2.423548 | UP   | 0.014014 | 0.071111 |
| C12 H24 N2 O8             | POS | -0.43811 | DOWN | 0.665246 | 0.607168 |
| C12 H24 N6 O4 S           | NEG | 0.368178 | UP   | 0.716212 | 0.623264 |
| C12 H25 N11 O S           | POS | -0.01115 | DOWN | 0.991221 | 0.697349 |
| C12 H25 N11 O3            | POS | -2.64746 | DOWN | 0.00696  | 0.045485 |
| C12 H25 N13 O4 S          | NEG | -1.20866 | DOWN | 0.229972 | 0.384362 |
| C12 H25 N15 O3            | POS | -1.24896 | DOWN | 0.214601 | 0.359996 |
| C12 H25 N3 O9             | POS | -0.40759 | DOWN | 0.687319 | 0.615796 |
| C12 H25 N5 S2             | POS | -1.68202 | DOWN | 0.092768 | 0.228762 |
| C12 H26 N2 O2 S2          | NEG | 1.475348 | UP   | 0.141548 | 0.292888 |
| C12 H26 N2 S3             | POS | -2.78162 | DOWN | 0.004432 | 0.031789 |
| C12 H26 N6 O2 S           | POS | -1.80425 | DOWN | 0.070815 | 0.198796 |
| C12 H26 O3 S              | NEG | -0.91354 | DOWN | 0.365578 | 0.475535 |
| C12 H26 O4 S - 10.587432  | NEG | -1.11497 | DOWN | 0.268595 | 0.409619 |
| C12 H27 N5 S2             | POS | -0.25079 | DOWN | 0.804489 | 0.653061 |
| C12 H31 N15 O S2          | NEG | -1.75273 | DOWN | 0.0795   | 0.213068 |
| C12 H32 Cl N9 O3          | POS | -0.623   | DOWN | 0.538021 | 0.546273 |

|                       |     |          |      |          |          |
|-----------------------|-----|----------|------|----------|----------|
| C12 H32 N16 S2        | POS | -1.59347 | DOWN | 0.111753 | 0.26464  |
| C12 H32 N6 O2 S2      | POS | -0.39407 | DOWN | 0.697183 | 0.613935 |
| C12 H34 N8 O8 S       | POS | -4.31424 | DOWN | 2.80E-06 | 0        |
| C12 H35 N9 O9         | POS | -0.21014 | DOWN | 0.835701 | 0.6608   |
| C12 H36 N10 S4        | POS | -1.2598  | DOWN | 0.210591 | 0.36959  |
| C12 H8 N2             | POS | 0.469507 | UP   | 0.642829 | 0.598256 |
| C13 H10 O + 5.9442377 | POS | -2.16484 | DOWN | 0.02909  | 0.107529 |
| C13 H14 N2 O3         | POS | -0.10186 | DOWN | 0.919934 | 0.681418 |
| C13 H14 N2 O3         | NEG | -0.92434 | DOWN | 0.359895 | 0.470194 |
| C13 H14 N2 O4         | NEG | -0.99854 | DOWN | 0.322327 | 0.447014 |
| C13 H14 N4            | POS | -0.01508 | DOWN | 0.988129 | 0.696901 |
| C13 H15 Cl N4         | POS | 0.567125 | UP   | 0.575195 | 0.574374 |
| C13 H16 Cl N O        | POS | -0.87667 | DOWN | 0.385385 | 0.493378 |
| C13 H16 N2 O4         | NEG | -0.60151 | DOWN | 0.552175 | 0.568051 |
| C13 H16 N2 O5         | POS | 1.968425 | UP   | 0.048072 | 0.160189 |
| C13 H16 N6            | POS | -0.20783 | DOWN | 0.837475 | 0.659242 |
| C13 H17 N3 O4         | POS | 1.205964 | UP   | 0.231025 | 0.380525 |
| C13 H17 N3 O4         | NEG | 3.251776 | UP   | 0.000738 | 0.006772 |
| C13 H18 N10           | POS | 3.835986 | UP   | 4.67E-05 | 0        |
| C13 H18 N2 O          | POS | 0.190844 | UP   | 0.850603 | 0.664738 |
| C13 H18 N2 O4         | NEG | -2.93492 | DOWN | 0.002564 | 0.022402 |
| C13 H18 N6 O4         | NEG | 0.894566 | UP   | 0.375692 | 0.477897 |
| C13 H20 N2 O4         | POS | -1.21514 | DOWN | 0.22745  | 0.370561 |
| C13 H20 O S2          | NEG | 1.494814 | UP   | 0.136267 | 0.292677 |
| C13 H21 N7 O5         | POS | 0.118266 | UP   | 0.907091 | 0.67885  |
| C13 H22 N2 O3         | POS | -1.06957 | DOWN | 0.288785 | 0.419744 |
| C13 H22 N2 O4         | POS | -0.41488 | DOWN | 0.682027 | 0.609344 |
| C13 H22 N2 O4         | NEG | -0.73405 | DOWN | 0.467799 | 0.525542 |
| C13 H22 O2 S2         | POS | -1.30973 | DOWN | 0.192811 | 0.342971 |
| C13 H22 O6            | POS | 1.385959 | UP   | 0.167777 | 0.303879 |
| C13 H23 Cl N6 O       | NEG | 0.610156 | UP   | 0.546459 | 0.556887 |
| C13 H23 Cl S          | POS | -0.13105 | DOWN | 0.897102 | 0.67663  |
| C13 H23 N O5          | POS | 0.2761   | UP   | 0.785207 | 0.647317 |
| C13 H23 N11 O3 S      | NEG | 0.077606 | UP   | 0.938956 | 0.686043 |
| C13 H23 N19           | POS | 1.119801 | UP   | 0.266504 | 0.413585 |
| C13 H24 Cl N3 O2      | POS | -2.03777 | DOWN | 0.04046  | 0.133334 |
| C13 H24 N2 O3 S       | POS | 1.656419 | UP   | 0.097977 | 0.24467  |
| C13 H24 N4 O5 S       | NEG | 1.89517  | UP   | 0.057346 | 0.174979 |
| C13 H24 S2            | NEG | 0.916883 | UP   | 0.363812 | 0.474911 |
| C13 H25 Cl N14        | POS | -2.2133  | DOWN | 0.025526 | 0.102738 |
| C13 H25 N O5          | POS | -1.17765 | DOWN | 0.242305 | 0.390391 |
| C13 H25 N7 O5         | POS | -0.55049 | DOWN | 0.586486 | 0.579079 |
| C13 H26 Cl2 N2 O      | POS | -2.64891 | DOWN | 0.006928 | 0.040721 |

|                           |     |          |      |          |          |
|---------------------------|-----|----------|------|----------|----------|
| C13 H26 N10 S             | NEG | -0.32735 | DOWN | 0.746566 | 0.634247 |
| C13 H27 N O4 S2           | POS | -1.19517 | DOWN | 0.23528  | 0.380848 |
| C13 H28 N2 O3 S2          | POS | -1.34324 | DOWN | 0.181496 | 0.332248 |
| C13 H28 N4 O3 S2          | NEG | -0.56927 | DOWN | 0.573748 | 0.571322 |
| C13 H28 O11               | POS | 0.500151 | UP   | 0.62125  | 0.59255  |
| C13 H28 O3 S2             | POS | 1.866229 | UP   | 0.061388 | 0.183515 |
| C13 H29 N O7              | POS | -0.07505 | DOWN | 0.940964 | 0.686387 |
| C13 H29 N7 O9             | POS | 0.960212 | UP   | 0.34141  | 0.457118 |
| C13 H30 N8 O4 S           | POS | 2.403762 | UP   | 0.014862 | 0.073916 |
| C13 H31 N13 S2            | POS | 1.732455 | UP   | 0.083141 | 0.228919 |
| C13 H31 N15 O2 S          | POS | -2.31875 | DOWN | 0.019023 | 0.082743 |
| C13 H31 N5 O9 S           | POS | -2.96455 | DOWN | 0.002297 | 0.0173   |
| C13 H31 N7 O9             | POS | -0.25787 | DOWN | 0.799084 | 0.650752 |
| C13 H31 N9 O2 S2          | POS | 0.778162 | UP   | 0.441345 | 0.511683 |
| C13 H32 N14 O5            | POS | 0.995936 | UP   | 0.3236   | 0.444372 |
| C13 H33 N11 O8            | POS | 1.659829 | UP   | 0.09727  | 0.239577 |
| C13 H35 N7 O11            | POS | 1.285346 | UP   | 0.201356 | 0.361532 |
| C13 H36 N16 S3            | POS | 0.395055 | UP   | 0.696464 | 0.620339 |
| C13 H37 N13 O5 S          | POS | -0.32471 | DOWN | 0.748539 | 0.634589 |
| C13 H39 N11 S4            | POS | 2.158548 | UP   | 0.029582 | 0.116245 |
| C14 H10 N2                | NEG | -4.21834 | DOWN | 5.16E-06 | 0        |
| C14 H12 N6                | POS | -2.52254 | DOWN | 0.010368 | 0.05069  |
| C14 H12 N6 O              | POS | -0.98363 | DOWN | 0.329665 | 0.446225 |
| C14 H14 N4                | POS | 0.696707 | UP   | 0.490845 | 0.534017 |
| C14 H15 N5 S              | POS | -0.07386 | DOWN | 0.941894 | 0.670363 |
| C14 H16                   | POS | -0.46004 | DOWN | 0.64956  | 0.600976 |
| C14 H16 N2 O4             | POS | -0.35451 | DOWN | 0.726331 | 0.628885 |
| C14 H16 N6 O2             | NEG | -1.29757 | DOWN | 0.197038 | 0.337744 |
| C14 H16 O4                | POS | -2.38174 | DOWN | 0.015857 | 0.077732 |
| C14 H17 N5                | POS | 0.977034 | UP   | 0.332949 | 0.463012 |
| C14 H18 O4                | POS | -1.01659 | DOWN | 0.313575 | 0.445763 |
| C14 H20 Cl N3 O3          | POS | -0.76416 | DOWN | 0.449653 | 0.517045 |
| C14 H20 N10 S             | NEG | -0.66451 | DOWN | 0.511184 | 0.539548 |
| C14 H20 N2 O2             | POS | -2.4546  | DOWN | 0.012767 | 0.069398 |
| C14 H20 N2 O3 + 2.4299998 | POS | 2.050839 | UP   | 0.039143 | 0.135198 |
| C14 H20 N2 O3 S           | NEG | -4.02227 | DOWN | 1.67E-05 | 0        |
| C14 H20 N2 O4             | POS | 1.094073 | UP   | 0.277769 | 0.415708 |
| C14 H20 N6 O              | POS | 0.370493 | UP   | 0.714504 | 0.625102 |
| C14 H20 N6 O4             | NEG | -0.98969 | DOWN | 0.326673 | 0.449556 |
| C14 H21 N O3 + 7.6616955  | POS | -2.17079 | DOWN | 0.028632 | 0.114804 |
| C14 H21 N3 O2             | POS | 2.127732 | UP   | 0.032093 | 0.116006 |
| C14 H22 N2 O3             | NEG | -0.06443 | DOWN | 0.949306 | 0.688588 |
| C14 H22 N2 O7             | POS | -1.25952 | DOWN | 0.210694 | 0.367055 |

|                           |     |          |      |          |          |
|---------------------------|-----|----------|------|----------|----------|
| C14 H22 N8 O              | POS | -0.20984 | DOWN | 0.835927 | 0.663163 |
| C14 H22 N8 O5             | NEG | -0.21562 | DOWN | 0.831471 | 0.657942 |
| C14 H22 O3 S              | POS | 0.525558 | UP   | 0.603594 | 0.584605 |
| C14 H23 N3 O4             | POS | -0.44122 | DOWN | 0.663016 | 0.607096 |
| C14 H24 N2 S2             | NEG | 1.101303 | UP   | 0.274572 | 0.410359 |
| C14 H24 N4 O7             | POS | -0.44369 | DOWN | 0.661238 | 0.607527 |
| C14 H24 N4 S              | NEG | -0.60857 | DOWN | 0.547505 | 0.558976 |
| C14 H24 O7                | POS | 0.037542 | UP   | 0.970449 | 0.692965 |
| C14 H25 N3 O5             | POS | 0.999548 | UP   | 0.321833 | 0.444837 |
| C14 H25 N5 O3             | POS | 0.510215 | UP   | 0.61423  | 0.586481 |
| C14 H25 N5 O5             | POS | 0.587021 | UP   | 0.561822 | 0.565741 |
| C14 H25 N7 O3             | POS | -1.3952  | DOWN | 0.164912 | 0.318965 |
| C14 H25 N9 S + 10.1726675 | POS | -2.03364 | DOWN | 0.040884 | 0.109589 |
| C14 H26 N2 O7 S           | NEG | -0.41742 | DOWN | 0.680181 | 0.610193 |
| C14 H27 N17 O3            | POS | -0.00533 | DOWN | 0.995801 | 0.698431 |
| C14 H28 N6 O4 S           | NEG | 1.098021 | UP   | 0.27602  | 0.414877 |
| C14 H28 N8 S2             | POS | 1.942844 | UP   | 0.051161 | 0.162045 |
| C14 H28 O3 S              | NEG | 1.882702 | UP   | 0.05906  | 0.176284 |
| C14 H28 O9                | POS | -0.77262 | DOWN | 0.44462  | 0.515969 |
| C14 H29 Cl O3             | NEG | -0.26127 | DOWN | 0.796493 | 0.650184 |
| C14 H29 Cl O4             | POS | 0.130914 | UP   | 0.897205 | 0.675972 |
| C14 H29 N O5 S            | POS | 0.22778  | UP   | 0.82212  | 0.655533 |
| C14 H29 N15 O2 S          | POS | 5.018394 | UP   | 1.27E-08 | 0        |
| C14 H29 N7 O S2           | POS | -1.3551  | DOWN | 0.177609 | 0.332991 |
| C14 H29 N7 S2             | POS | -2.11633 | DOWN | 0.033066 | 0.116006 |
| C14 H30 Cl N S2           | POS | -0.25781 | DOWN | 0.799125 | 0.649329 |
| C14 H30 O4 S              | NEG | 1.811883 | UP   | 0.069595 | 0.197081 |
| C14 H31 N11 O5            | POS | 0.176072 | UP   | 0.862048 | 0.66666  |
| C14 H31 N7 O S2           | POS | -0.12958 | DOWN | 0.898246 | 0.675361 |
| C14 H31 N9 O S2           | POS | -0.20352 | DOWN | 0.840807 | 0.659969 |
| C14 H31 N9 O9             | POS | -4.49137 | DOWN | 8.45E-07 | 0        |
| C14 H32 Cl2 N4 O5         | POS | -1.83543 | DOWN | 0.065937 | 0.186131 |
| C14 H32 N12 O3 S2         | NEG | 0.073852 | UP   | 0.941904 | 0.685768 |
| C14 H32 N6 O8 S           | POS | -2.07126 | DOWN | 0.037156 | 0.132156 |
| C14 H32 N8 O12            | NEG | 1.260978 | UP   | 0.21016  | 0.361362 |
| C14 H32 N8 O6             | POS | -0.7166  | DOWN | 0.478497 | 0.52936  |
| C14 H33 Cl N4 O5          | POS | 0.903997 | UP   | 0.370643 | 0.479511 |
| C14 H33 N11 O4 S          | POS | 0.280052 | UP   | 0.782208 | 0.645253 |
| C14 H34 N10 O7 S          | POS | 1.702004 | UP   | 0.088854 | 0.230482 |
| C14 H34 N4 O3 S3          | POS | 0.27374  | UP   | 0.787    | 0.646564 |
| C14 H34 N6 O11            | POS | 0.554094 | UP   | 0.584032 | 0.574079 |
| C14 H35 N13 O3 S2         | POS | 2.221185 | UP   | 0.024982 | 0.094234 |
| C14 H35 N5 O8 S           | POS | 4.120405 | UP   | 9.39E-06 | 0        |

|                          |     |          |      |          |          |
|--------------------------|-----|----------|------|----------|----------|
| C14 H35 N7 O7 S          | POS | -4.66589 | DOWN | 2.36E-07 | 0        |
| C14 H37 N11 O2 S3        | POS | -0.82443 | DOWN | 0.414516 | 0.494605 |
| C14 H37 N11 O5 S         | POS | 0.971677 | UP   | 0.335629 | 0.456993 |
| C14 H37 N11 O6 S2        | POS | 0.046086 | UP   | 0.963727 | 0.691092 |
| C14 H37 N13 O5 S         | POS | -4.53838 | DOWN | 6.05E-07 | 0        |
| C14 H38 N8 O2 S3         | POS | 0.389246 | UP   | 0.700716 | 0.619735 |
| C14 H39 N9 O8 S          | POS | -0.44983 | DOWN | 0.656843 | 0.606378 |
| C14 H40 N14 O2 S3        | POS | 0.435493 | UP   | 0.667129 | 0.609273 |
| C14 H41 N11 O7 S         | POS | -0.49049 | DOWN | 0.628018 | 0.594585 |
| C15 H10 N2               | POS | -2.90765 | DOWN | 0.002833 | 0.02339  |
| C15 H11 N                | POS | -2.60353 | DOWN | 0.008026 | 0.045485 |
| C15 H13 N7               | POS | -2.24116 | DOWN | 0.023649 | 0.097717 |
| C15 H14 N2 O3            | POS | 2.372412 | UP   | 0.016295 | 0.079427 |
| C15 H16 O4               | POS | -2.55051 | DOWN | 0.0095   | 0.050305 |
| C15 H17 N7 O             | POS | 2.229667 | UP   | 0.024408 | 0.09857  |
| C15 H18 N10 O2           | NEG | 0.332114 | UP   | 0.743002 | 0.633218 |
| C15 H18 N2               | POS | -0.33311 | DOWN | 0.742257 | 0.633843 |
| C15 H18 N4 O2            | POS | 0.088112 | UP   | 0.930711 | 0.687684 |
| C15 H18 N8 S             | POS | 0.074053 | UP   | 0.941746 | 0.685355 |
| C15 H19 N9 S             | NEG | 0.430569 | UP   | 0.670676 | 0.607741 |
| C15 H20 N2 O6            | POS | 1.727722 | UP   | 0.084009 | 0.221876 |
| C15 H20 N8 O             | NEG | -2.05667 | DOWN | 0.038567 | 0.129525 |
| C15 H20 O2 + 1.6722274   | POS | -2.4377  | DOWN | 0.013433 | 0.062608 |
| C15 H21 Cl N6 O          | NEG | 0.512066 | UP   | 0.612943 | 0.585645 |
| C15 H21 N O3             | POS | 1.289693 | UP   | 0.199813 | 0.356182 |
| C15 H23 Cl N4 O4         | NEG | -0.47315 | DOWN | 0.640249 | 0.599192 |
| C15 H23 N O4             | NEG | -0.313   | DOWN | 0.757324 | 0.639759 |
| C15 H23 N5 O S           | NEG | -1.69184 | DOWN | 0.090828 | 0.230948 |
| C15 H23 N7 O6            | POS | 1.394126 | UP   | 0.165242 | 0.322064 |
| C15 H24 N2 S             | POS | 1.303988 | UP   | 0.1948   | 0.348032 |
| C15 H24 N6 O4 + 1.474389 | POS | 3.31069  | UP   | 0.000575 | 0.006772 |
| C15 H24 O3 S             | NEG | 0.211071 | UP   | 0.834979 | 0.659135 |
| C15 H24 O7               | POS | 0.534765 | UP   | 0.597252 | 0.579614 |
| C15 H26 N10 O4 S         | NEG | 0.018266 | UP   | 0.985619 | 0.696174 |
| C15 H26 N2 O3 S2         | POS | -0.53292 | DOWN | 0.59852  | 0.576885 |
| C15 H26 N6 O2 S2         | NEG | 0.5926   | UP   | 0.558099 | 0.561805 |
| C15 H26 O S2             | POS | -1.24692 | DOWN | 0.215361 | 0.360851 |
| C15 H26 O8               | POS | -0.90252 | DOWN | 0.37143  | 0.477001 |
| C15 H27 N O6             | POS | -0.48805 | DOWN | 0.629737 | 0.595233 |
| C15 H27 N3 O S2          | POS | -1.58999 | DOWN | 0.112555 | 0.256567 |
| C15 H28 N16 O3 + 4.0208  | POS | 1.488648 | UP   | 0.137923 | 0.295399 |
| C15 H28 N2 O3 S          | POS | 0.253859 | UP   | 0.802144 | 0.652276 |
| C15 H28 N2 O3 S2         | NEG | -1.24492 | DOWN | 0.216107 | 0.368123 |

|                     |     |          |      |          |          |
|---------------------|-----|----------|------|----------|----------|
| C15 H28 N4 O5       | POS | -0.24693 | DOWN | 0.807444 | 0.654065 |
| C15 H29 Cl N2 O S2  | NEG | 0.645954 | UP   | 0.523094 | 0.546874 |
| C15 H29 N S3        | POS | -2.19815 | DOWN | 0.026598 | 0.10622  |
| C15 H30 N6 O S2     | POS | 1.492137 | UP   | 0.136984 | 0.293205 |
| C15 H31 N3 O5 S2    | POS | -1.6162  | DOWN | 0.106617 | 0.252376 |
| C15 H32 N2 O12      | POS | -0.7752  | DOWN | 0.443095 | 0.512006 |
| C15 H32 N2 O3 S3    | NEG | -2.60774 | DOWN | 0.007919 | 0.044227 |
| C15 H32 N8 O4 S     | POS | 0.92356  | UP   | 0.360303 | 0.470892 |
| C15 H32 O4 S2       | POS | 0.235092 | UP   | 0.816507 | 0.654315 |
| C15 H33 N17 O4      | NEG | -0.27419 | DOWN | 0.786657 | 0.646273 |
| C15 H33 N9 O5 S     | POS | 0.812237 | UP   | 0.421494 | 0.503888 |
| C15 H35 N17 O2 S2   | NEG | -1.39504 | DOWN | 0.164959 | 0.316628 |
| C15 H35 N7 O10      | POS | 0.346925 | UP   | 0.731961 | 0.632529 |
| C15 H37 Cl N12 S2   | POS | 1.881905 | UP   | 0.059171 | 0.174604 |
| C15 H37 N11 O9      | POS | -2.26093 | DOWN | 0.022388 | 0.086916 |
| C15 H37 N9 O11      | POS | 1.358268 | UP   | 0.17658  | 0.336024 |
| C15 H37 N9 O7 S     | POS | 0.851067 | UP   | 0.399507 | 0.496885 |
| C15 H39 N7 O12      | POS | -1.47105 | DOWN | 0.142733 | 0.307522 |
| C15 H40 N8 O5 S2    | POS | -0.7702  | DOWN | 0.446057 | 0.515021 |
| C16 H14 N4 O2       | POS | -0.79448 | DOWN | 0.431772 | 0.507191 |
| C16 H14 N6 O        | NEG | 2.144278 | UP   | 0.030724 | 0.1186   |
| C16 H15 N5 O2       | POS | -0.26993 | DOWN | 0.789893 | 0.647837 |
| C16 H16 N10 O       | NEG | -2.76921 | DOWN | 0.004626 | 0.02339  |
| C16 H16 N12 O       | POS | 0.024679 | UP   | 0.980571 | 0.693599 |
| C16 H16 N2 O        | POS | 0.223266 | UP   | 0.82559  | 0.657888 |
| C16 H16 N2 O3       | NEG | 0.155253 | UP   | 0.878228 | 0.671043 |
| C16 H16 N4 O        | POS | -0.12701 | DOWN | 0.900258 | 0.67492  |
| C16 H18 N2 O2       | POS | -1.33141 | DOWN | 0.185433 | 0.343754 |
| C16 H18 N4          | POS | -1.27595 | DOWN | 0.204717 | 0.355128 |
| C16 H19 N5 + 3.5305 | POS | 1.170922 | UP   | 0.245038 | 0.405494 |
| C16 H20 N6 O5       | POS | -0.48561 | DOWN | 0.631453 | 0.595271 |
| C16 H20 O6          | POS | -2.11946 | DOWN | 0.032797 | 0.119064 |
| C16 H21 N O3 S      | NEG | 2.031287 | UP   | 0.041127 | 0.149202 |
| C16 H21 N13 O2      | POS | 0.425909 | UP   | 0.674038 | 0.610475 |
| C16 H22 Cl N5       | POS | 0.628165 | UP   | 0.534642 | 0.55611  |
| C16 H22 N6 O2       | POS | -0.13241 | DOWN | 0.896035 | 0.681865 |
| C16 H22 N6 O3       | NEG | -0.07064 | DOWN | 0.944431 | 0.686889 |
| C16 H22 N8 O2 S     | NEG | 0.891104 | UP   | 0.377555 | 0.47672  |
| C16 H22 O S         | POS | -1.86667 | DOWN | 0.061325 | 0.186476 |
| C16 H23 N S         | POS | 1.757265 | UP   | 0.078703 | 0.210335 |
| C16 H23 N5 O3       | POS | 0.45337  | UP   | 0.654313 | 0.607204 |
| C16 H24 Cl N3 S     | POS | -0.56485 | DOWN | 0.576734 | 0.571535 |
| C16 H24 N12 O S     | NEG | -0.25806 | DOWN | 0.79894  | 0.650724 |

|                    |     |          |      |          |          |
|--------------------|-----|----------|------|----------|----------|
| C16 H24 N2 O S2    | POS | -2.03251 | DOWN | 0.041001 | 0.137491 |
| C16 H24 N2 O5 S    | POS | -1.42141 | DOWN | 0.156979 | 0.311858 |
| C16 H24 N6 O3 S    | NEG | -0.73549 | DOWN | 0.466921 | 0.523749 |
| C16 H24 N6 S2      | NEG | -1.35899 | DOWN | 0.176348 | 0.332434 |
| C16 H24 O3 S       | NEG | 0.959356 | UP   | 0.341844 | 0.460456 |
| C16 H24 O7         | POS | -0.12355 | DOWN | 0.902958 | 0.677768 |
| C16 H24 O8         | POS | 1.427751 | UP   | 0.155103 | 0.313532 |
| C16 H25 N3 O8      | NEG | 3.631764 | UP   | 0.000132 | 0        |
| C16 H25 N5 O6      | POS | -1.39361 | DOWN | 0.165403 | 0.314259 |
| C16 H26 N10 O2     | POS | -2.1153  | DOWN | 0.033156 | 0.116957 |
| C16 H26 N4 O S2    | POS | 1.013183 | UP   | 0.315217 | 0.441359 |
| C16 H26 O3 S       | POS | -0.00317 | DOWN | 0.997502 | 0.698705 |
| C16 H26 O3 S       | NEG | -1.22459 | DOWN | 0.223804 | 0.371848 |
| C16 H26 O4 S       | POS | -0.26098 | DOWN | 0.796711 | 0.648383 |
| C16 H27 N7 O S     | POS | -0.86869 | DOWN | 0.389753 | 0.488117 |
| C16 H28 N14 S      | POS | -0.73227 | DOWN | 0.468886 | 0.526558 |
| C16 H29 Cl N4 O2   | NEG | -2.60264 | DOWN | 0.008049 | 0.051451 |
| C16 H29 N5 O S2    | POS | 0.203685 | UP   | 0.840677 | 0.661999 |
| C16 H29 N5 O2 S    | POS | 0.86162  | UP   | 0.39365  | 0.491209 |
| C16 H29 N9 O S2    | POS | 0.270682 | UP   | 0.789324 | 0.64697  |
| C16 H30 N12 O2 S2  | NEG | 0.207308 | UP   | 0.837881 | 0.661308 |
| C16 H30 N2 O8 S    | NEG | 0.945242 | UP   | 0.349051 | 0.463254 |
| C16 H31 Cl N12 O   | POS | 1.352179 | UP   | 0.17856  | 0.331219 |
| C16 H31 Cl N4 O4   | POS | 0.642855 | UP   | 0.525096 | 0.548944 |
| C16 H31 N O S2     | POS | 1.544024 | UP   | 0.123577 | 0.270988 |
| C16 H31 N5 O S2    | POS | 2.726115 | UP   | 0.005358 | 0.024455 |
| C16 H31 N5 S2      | POS | 2.964095 | UP   | 0.002301 | 0.020276 |
| C16 H34 N12 O6 S   | POS | -0.05582 | DOWN | 0.956072 | 0.689823 |
| C16 H35 N11 O S2   | NEG | -0.69927 | DOWN | 0.489245 | 0.531747 |
| C16 H35 N11 S2     | POS | 0.140249 | UP   | 0.88992  | 0.673167 |
| C16 H35 N3 S4      | POS | -0.2083  | DOWN | 0.837119 | 0.662159 |
| C16 H36 N10 O3 S2  | POS | -0.46118 | DOWN | 0.648745 | 0.606125 |
| C16 H36 N2 O3 S2   | NEG | -1.66699 | DOWN | 0.095799 | 0.240314 |
| C16 H36 N6 O8      | POS | -0.18653 | DOWN | 0.85394  | 0.664503 |
| C16 H37 N5 O8 S    | POS | 0.330693 | UP   | 0.744064 | 0.635733 |
| C16 H38 N2 O6 S2   | POS | 1.900026 | UP   | 0.05669  | 0.177209 |
| C16 H39 N15 O3 S2  | POS | -0.59217 | DOWN | 0.558388 | 0.56451  |
| C16 H39 N9 O13     | POS | -1.76407 | DOWN | 0.077519 | 0.207387 |
| C16 H39 N9 O9      | POS | -1.1753  | DOWN | 0.243256 | 0.398005 |
| C16 H40 Cl N15 O S | POS | 0.9508   | UP   | 0.346201 | 0.460884 |
| C16 H41 N11 O6 S   | POS | 1.575822 | UP   | 0.115868 | 0.275082 |
| C16 H42 N14 O7 S   | POS | 1.809551 | UP   | 0.069966 | 0.187163 |
| C16 H43 N9 O11     | POS | 1.387352 | UP   | 0.167342 | 0.327905 |

|                          |     |          |      |          |          |
|--------------------------|-----|----------|------|----------|----------|
| C16 H43 N9 O9 S          | POS | 0.390264 | UP   | 0.69997  | 0.617878 |
| C16 H45 N11 O10 S        | POS | -0.60798 | DOWN | 0.547892 | 0.560417 |
| C17 H11 N O              | POS | -0.85464 | DOWN | 0.397516 | 0.486471 |
| C17 H16 N10              | NEG | 0.367531 | UP   | 0.71669  | 0.62184  |
| C17 H18                  | NEG | 0.430814 | UP   | 0.670499 | 0.608882 |
| C17 H18 N10              | NEG | 0.093714 | UP   | 0.926318 | 0.688971 |
| C17 H18 N4 - 9.8863735   | NEG | -0.02778 | DOWN | 0.978134 | 0.694686 |
| C17 H18 N4 + 10.218596   | POS | 0.267387 | UP   | 0.791831 | 0.647837 |
| C17 H18 O                | POS | -0.00098 | DOWN | 0.999227 | 0.699106 |
| C17 H18 O2               | NEG | 0.191436 | UP   | 0.850144 | 0.663032 |
| C17 H18 O5 + 8.7336      | POS | 1.348574 | UP   | 0.17974  | 0.341219 |
| C17 H20 N10 - 6.0427375  | NEG | -0.53993 | DOWN | 0.593707 | 0.578337 |
| C17 H20 N10 - 6.4647493  | NEG | -1.39604 | DOWN | 0.164653 | 0.325496 |
| C17 H21 N O3             | POS | 0.338515 | UP   | 0.738224 | 0.631364 |
| C17 H21 N5 O             | POS | -0.11675 | DOWN | 0.908274 | 0.678226 |
| C17 H22 N2 O3            | NEG | 0.969026 | UP   | 0.33696  | 0.461312 |
| C17 H22 N2 O7            | POS | 3.276214 | UP   | 0.000666 | 0.002828 |
| C17 H22 N4 O2            | POS | -1.69997 | DOWN | 0.089247 | 0.242796 |
| C17 H22 O6               | POS | 0.880462 | UP   | 0.383319 | 0.491209 |
| C17 H22 S2               | POS | 0.311453 | UP   | 0.758489 | 0.637024 |
| C17 H24 N12 O S          | NEG | 0.662504 | UP   | 0.512463 | 0.547058 |
| C17 H24 N14 S            | POS | -0.13565 | DOWN | 0.893511 | 0.675141 |
| C17 H24 N6 O2            | POS | -1.1085  | DOWN | 0.271412 | 0.4061   |
| C17 H24 N6 O3            | NEG | -0.38111 | DOWN | 0.706684 | 0.621274 |
| C17 H24 O3               | POS | 0.230609 | UP   | 0.819948 | 0.657125 |
| C17 H25 N7 O3            | POS | 2.735005 | UP   | 0.005199 | 0.034555 |
| C17 H26 N10 O3 S         | NEG | -1.84948 | DOWN | 0.063829 | 0.185265 |
| C17 H26 N2 O5 S          | POS | 0.469579 | UP   | 0.642778 | 0.603914 |
| C17 H26 N6 O3 S          | NEG | -0.78657 | DOWN | 0.436399 | 0.507995 |
| C17 H26 O S2             | POS | 1.207087 | UP   | 0.230585 | 0.371367 |
| C17 H26 O3 S - 10.53332  | NEG | 0.235058 | UP   | 0.816534 | 0.656413 |
| C17 H26 O5               | NEG | -1.15165 | DOWN | 0.252988 | 0.396505 |
| C17 H27 Cl O4            | NEG | 1.699614 | UP   | 0.089315 | 0.229233 |
| C17 H27 N7 O2 S - 4.379  | NEG | -0.49287 | DOWN | 0.626352 | 0.5917   |
| C17 H28 N6 O8            | POS | 1.019188 | UP   | 0.312331 | 0.449621 |
| C17 H28 O3 S             | POS | -1.19755 | DOWN | 0.234337 | 0.38333  |
| C17 H28 O3 S - 11.375057 | NEG | 0.852577 | UP   | 0.398666 | 0.491313 |
| C17 H29 N O8 + 5.1114116 | POS | -0.19658 | DOWN | 0.846164 | 0.663005 |
| C17 H29 N15 O            | NEG | -3.90515 | DOWN | 3.22E-05 | 0.00158  |
| C17 H29 N15 S            | POS | -1.45454 | DOWN | 0.147362 | 0.306386 |
| C17 H29 N5 O5            | POS | 0.24741  | UP   | 0.807073 | 0.653033 |
| C17 H30 N10 O S          | NEG | -0.89324 | DOWN | 0.376405 | 0.481879 |
| C17 H30 N2 O7            | POS | -2.16336 | DOWN | 0.029205 | 0.111608 |



|                           |     |          |      |          |          |
|---------------------------|-----|----------|------|----------|----------|
| C17 H30 N2 O8             | NEG | 1.466231 | UP   | 0.144073 | 0.294149 |
| C17 H31 N13 O2 S          | POS | -2.25425 | DOWN | 0.022807 | 0.096279 |
| C17 H31 N5 O3 S           | POS | 0.867008 | UP   | 0.390679 | 0.490271 |
| C17 H32 N14 O2 S2         | POS | -0.54629 | DOWN | 0.589351 | 0.578254 |
| C17 H32 N2 O8 S           | NEG | 0.430055 | UP   | 0.671046 | 0.610299 |
| C17 H32 N2 S3             | POS | 1.994263 | UP   | 0.04511  | 0.150232 |
| C17 H33 N7 O11            | POS | 1.576494 | UP   | 0.11571  | 0.265273 |
| C17 H33 N9 O4 S           | POS | 0.411515 | UP   | 0.684467 | 0.614108 |
| C17 H34 N4 O S2           | POS | 0.37136  | UP   | 0.713865 | 0.622404 |
| C17 H34 O5 S              | NEG | -0.19339 | DOWN | 0.848631 | 0.663058 |
| C17 H34 O5 S2             | POS | -0.8236  | DOWN | 0.414987 | 0.49547  |
| C17 H35 Cl N6 O4 S        | POS | -0.83557 | DOWN | 0.408198 | 0.494452 |
| C17 H35 N3 O11            | POS | 2.30718  | UP   | 0.01966  | 0.08372  |
| C17 H35 N7 O9             | POS | 1.283401 | UP   | 0.202049 | 0.35948  |
| C17 H36 N2 O5 S2          | POS | -1.06942 | DOWN | 0.288857 | 0.422976 |
| C17 H37 Cl N8 O7          | POS | 0.015414 | UP   | 0.987865 | 0.696452 |
| C17 H37 N9 O6 S           | POS | 0.021308 | UP   | 0.983225 | 0.695938 |
| C17 H38 N8 O13            | POS | 2.210201 | UP   | 0.025742 | 0.105427 |
| C17 H39 N7 O11            | POS | 0.106039 | UP   | 0.91666  | 0.680732 |
| C17 H40 N8 O8 S           | POS | 2.277494 | UP   | 0.021376 | 0.093938 |
| C17 H41 N11 O10           | POS | 1.860056 | UP   | 0.062279 | 0.192357 |
| C17 H41 N17 O S2          | POS | -1.01803 | DOWN | 0.312886 | 0.438643 |
| C17 H41 N21 S2            | POS | 1.593231 | UP   | 0.111807 | 0.266909 |
| C17 H42 N6 O S3           | NEG | -0.49367 | DOWN | 0.625786 | 0.592743 |
| C17 H42 N6 O5 S2          | NEG | -2.54765 | DOWN | 0.009586 | 0.055271 |
| C17 H43 N7 O13            | POS | -0.34289 | DOWN | 0.734966 | 0.632655 |
| C17 H45 N11 O8 S2         | POS | 2.851398 | UP   | 0.003469 | 0.02339  |
| C17 H45 N17 O3 S2         | POS | 0.980371 | UP   | 0.331286 | 0.448647 |
| C17 H46 N10 S4            | POS | -1.03085 | DOWN | 0.306775 | 0.437064 |
| C17 H48 N12 O7 S2         | POS | -0.30454 | DOWN | 0.763691 | 0.637818 |
| C18 H10                   | POS | -1.99405 | DOWN | 0.045133 | 0.145205 |
| C18 H14 O + 3.5519335     | POS | 2.95451  | UP   | 0.002385 | 0.019131 |
| C18 H14 O2                | POS | 0.401555 | UP   | 0.691717 | 0.615831 |
| C18 H16 N2 O              | POS | -2.34748 | DOWN | 0.017518 | 0.082743 |
| C18 H16 S                 | POS | -4.01959 | DOWN | 1.69E-05 | 0        |
| C18 H18 N6 O3 + 6.8881874 | POS | -0.83098 | DOWN | 0.410799 | 0.516149 |
| C18 H18 O2                | POS | -1.18409 | DOWN | 0.239706 | 0.384678 |
| C18 H20 N2 O3             | POS | 0.602029 | UP   | 0.551833 | 0.564246 |
| C18 H20 O4                | POS | -0.69846 | DOWN | 0.489752 | 0.533937 |
| C18 H20 S                 | NEG | -3.31415 | DOWN | 0.000567 | 0.005943 |
| C18 H21 N3 O3             | POS | 0.439624 | UP   | 0.664158 | 0.610299 |
| C18 H22 N14 O             | NEG | -4.64306 | DOWN | 2.80E-07 | 0        |
| C18 H22 N4                | NEG | -0.76175 | DOWN | 0.45109  | 0.519927 |

|                         |     |          |      |          |          |
|-------------------------|-----|----------|------|----------|----------|
| C18 H22 N4 O            | NEG | 0.174546 | UP   | 0.863233 | 0.666763 |
| C18 H22 O3              | POS | 1.291758 | UP   | 0.199083 | 0.349125 |
| C18 H23 N15 O3          | NEG | -0.86922 | DOWN | 0.389461 | 0.483404 |
| C18 H23 N3 O S          | POS | 0.740607 | UP   | 0.463813 | 0.52319  |
| C18 H23 N5              | POS | 1.431074 | UP   | 0.154127 | 0.309848 |
| C18 H23 N9 O            | POS | -1.04084 | DOWN | 0.302067 | 0.428053 |
| C18 H24 Cl N            | POS | 0.675252 | UP   | 0.504349 | 0.539262 |
| C18 H24 N12 O S         | NEG | -1.48042 | DOWN | 0.140157 | 0.292994 |
| C18 H24 O4 S            | POS | 1.188807 | UP   | 0.237815 | 0.387264 |
| C18 H24 O6              | POS | 0.339773 | UP   | 0.737286 | 0.634434 |
| C18 H25 Cl O3           | POS | -2.46631 | DOWN | 0.012323 | 0.057102 |
| C18 H25 N O3            | POS | 1.748639 | UP   | 0.080224 | 0.211877 |
| C18 H25 N5 O S          | POS | 0.06806  | UP   | 0.946453 | 0.688114 |
| C18 H26 N12 + 12.657447 | POS | -1.23822 | DOWN | 0.218626 | 0.367384 |
| C18 H26 N6 O5           | POS | 3.029396 | UP   | 0.001798 | 0.008611 |
| C18 H26 O7              | NEG | -1.67345 | DOWN | 0.094486 | 0.246098 |
| C18 H26 O8 - 4.7898607  | NEG | -0.9984  | DOWN | 0.322395 | 0.44975  |
| C18 H26 O8 - 6.1956897  | NEG | 0.805396 | UP   | 0.425438 | 0.506002 |
| C18 H27 Cl N4 O         | POS | -0.41783 | DOWN | 0.679883 | 0.611986 |
| C18 H28 N12 O3 S        | NEG | 2.123853 | UP   | 0.032422 | 0.117193 |
| C18 H28 N12 O6          | POS | 2.90885  | UP   | 0.002821 | 0.019131 |
| C18 H28 N2 O5 S         | POS | -0.09866 | DOWN | 0.922439 | 0.680495 |
| C18 H28 N6 O3 S         | NEG | -0.98349 | DOWN | 0.329737 | 0.450976 |
| C18 H28 N6 O8           | POS | -0.86712 | DOWN | 0.390616 | 0.486631 |
| C18 H30 N12 O S2        | NEG | 0.781091 | UP   | 0.439618 | 0.512052 |
| C18 H30 N2 O6 S         | POS | -1.61061 | DOWN | 0.107861 | 0.258161 |
| C18 H30 O3 S            | POS | 0.317396 | UP   | 0.754025 | 0.638336 |
| C18 H30 O3 S            | NEG | 0.639928 | UP   | 0.526991 | 0.549935 |
| C18 H30 O9              | POS | 0.312437 | UP   | 0.75775  | 0.636993 |
| C18 H31 N15 O2          | POS | 2.574152 | UP   | 0.008816 | 0.051828 |
| C18 H31 N3 O8           | POS | 0.076161 | UP   | 0.940091 | 0.685906 |
| C18 H32 N10 S2          | POS | 0.089631 | UP   | 0.92952  | 0.683782 |
| C18 H33 N5 O2 S2        | POS | 0.302422 | UP   | 0.76529  | 0.639759 |
| C18 H34 N2 O2 S2        | POS | 1.160767 | UP   | 0.249205 | 0.390554 |
| C18 H34 N2 O3 S2        | POS | -0.58386 | DOWN | 0.563937 | 0.566877 |
| C18 H34 N2 O4 S2        | POS | 1.333579 | UP   | 0.184708 | 0.339624 |
| C18 H34 N2 O7 S         | NEG | -0.34129 | DOWN | 0.736156 | 0.630827 |
| C18 H34 N2 O8 S         | NEG | 0.302231 | UP   | 0.765433 | 0.639638 |
| C18 H35 Cl N16 O4       | POS | 3.119105 | UP   | 0.001268 | 0.014618 |
| C18 H35 N3 O3 S2        | POS | -2.03752 | DOWN | 0.040486 | 0.145632 |
| C18 H35 N5 O S2         | POS | 0.096508 | UP   | 0.924128 | 0.68163  |
| C18 H36 N2 O3 S2        | POS | 1.043313 | UP   | 0.300908 | 0.431973 |
| C18 H36 N4 O13          | POS | -1.80344 | DOWN | 0.070946 | 0.197253 |

|                           |     |          |      |          |          |
|---------------------------|-----|----------|------|----------|----------|
| C18 H37 N O S3            | POS | -1.7585  | DOWN | 0.078487 | 0.214755 |
| C18 H37 N3 O2 S2          | POS | -0.24179 | DOWN | 0.811374 | 0.650922 |
| C18 H38 N4 O5 S2          | POS | 0.373186 | UP   | 0.712518 | 0.625036 |
| C18 H39 N O3 S3           | POS | 1.638768 | UP   | 0.101699 | 0.251277 |
| C18 H39 N S4              | POS | -1.33646 | DOWN | 0.183747 | 0.34236  |
| C18 H39 N11 O S2          | POS | 0.327189 | UP   | 0.746685 | 0.634496 |
| C18 H40 N14 O7 S          | POS | -1.03351 | DOWN | 0.305514 | 0.438643 |
| C18 H40 N2 O2 S4          | POS | 0.021031 | UP   | 0.983443 | 0.69583  |
| C18 H41 N11 O7 S          | POS | 0.255956 | UP   | 0.800544 | 0.651233 |
| C18 H43 N11 O12           | POS | 1.641082 | UP   | 0.101205 | 0.24709  |
| C18 H44 N6 O13            | POS | 0.345493 | UP   | 0.733027 | 0.631238 |
| C18 H44 N8 O4 S3          | POS | 0.93064  | UP   | 0.356604 | 0.471182 |
| C18 H47 N9 O10 S          | POS | 1.337121 | UP   | 0.183525 | 0.33575  |
| C18 H48 N10 O6 S3         | POS | 0.939572 | UP   | 0.351972 | 0.462103 |
| C19 H16 O2                | POS | -3.07934 | DOWN | 0.001483 | 0.013293 |
| C19 H17 N5 O              | POS | 1.57968  | UP   | 0.114959 | 0.266909 |
| C19 H18 N4                | POS | 0.534999 | UP   | 0.597091 | 0.578626 |
| C19 H18 O                 | POS | -0.9394  | DOWN | 0.352062 | 0.467614 |
| C19 H22 N14               | POS | 1.901449 | UP   | 0.056499 | 0.174604 |
| C19 H22 N8 O              | POS | -1.17045 | DOWN | 0.24523  | 0.400352 |
| C19 H22 O3                | POS | 0.761721 | UP   | 0.451106 | 0.515608 |
| C19 H23 N3 O S            | POS | -1.09822 | DOWN | 0.27593  | 0.415935 |
| C19 H24 S2                | POS | 1.754866 | UP   | 0.079124 | 0.213913 |
| C19 H25 N O S             | POS | -0.4317  | DOWN | 0.669862 | 0.609698 |
| C19 H25 N O3              | POS | 0.445147 | UP   | 0.660196 | 0.595727 |
| C19 H25 N17 O             | NEG | -0.64132 | DOWN | 0.526087 | 0.550499 |
| C19 H26 N10 O5            | POS | -1.13666 | DOWN | 0.259291 | 0.404659 |
| C19 H26 N4 O6             | POS | -0.93244 | DOWN | 0.355668 | 0.470136 |
| C19 H26 N6 O              | POS | -1.32997 | DOWN | 0.185918 | 0.339713 |
| C19 H26 O S               | POS | -0.00747 | DOWN | 0.994123 | 0.697604 |
| C19 H26 S2                | POS | 2.182162 | UP   | 0.027771 | 0.111608 |
| C19 H27 N7 O4 + 5.2991037 | POS | -1.00437 | DOWN | 0.319484 | 0.425375 |
| C19 H28 Cl N7             | POS | 0.146201 | UP   | 0.885279 | 0.673489 |
| C19 H28 N14 O2 S          | NEG | -0.70883 | DOWN | 0.483299 | 0.530681 |
| C19 H28 N4 O5 S           | POS | -2.12181 | DOWN | 0.032596 | 0.119295 |
| C19 H28 O2 S2             | POS | 0.254197 | UP   | 0.801886 | 0.651148 |
| C19 H28 O5 S              | NEG | -1.37323 | DOWN | 0.171783 | 0.331874 |
| C19 H29 Cl N10            | NEG | 2.602418 | UP   | 0.008055 | 0.046715 |
| C19 H29 N21 O3            | POS | 3.02868  | UP   | 0.001803 | 0.019711 |
| C19 H29 N7 S2             | POS | -0.79756 | DOWN | 0.429981 | 0.504226 |
| C19 H30 N10 O3            | POS | 1.03588  | UP   | 0.304398 | 0.434709 |
| C19 H30 N24               | POS | -3.95561 | DOWN | 2.43E-05 | 0        |
| C19 H30 N6 O9             | POS | 0.180918 | UP   | 0.858291 | 0.664921 |

|                   |     |          |      |          |          |
|-------------------|-----|----------|------|----------|----------|
| C19 H30 N8 O3 S   | POS | -1.48246 | DOWN | 0.139602 | 0.292783 |
| C19 H30 O3 S      | NEG | -1.39316 | DOWN | 0.16554  | 0.329807 |
| C19 H30 O5 S      | NEG | 0.742766 | UP   | 0.462505 | 0.520278 |
| C19 H31 Cl N22 O  | POS | -2.48983 | DOWN | 0.011469 | 0.069975 |
| C19 H31 N11 O6    | POS | 1.590269 | UP   | 0.11249  | 0.270009 |
| C19 H32 O3 S      | POS | 1.435992 | UP   | 0.15269  | 0.308995 |
| C19 H32 O3 S      | NEG | -1.03543 | DOWN | 0.304609 | 0.432889 |
| C19 H33 Cl N14 O3 | NEG | -1.97827 | DOWN | 0.046925 | 0.16569  |
| C19 H33 Cl N2 S   | NEG | -0.52112 | DOWN | 0.606665 | 0.581982 |
| C19 H33 N3 O9     | POS | 1.015321 | UP   | 0.314188 | 0.449556 |
| C19 H34 Cl2 O5    | POS | -0.82878 | DOWN | 0.412045 | 0.498388 |
| C19 H34 N2 O5 S2  | POS | 0.920118 | UP   | 0.36211  | 0.474456 |
| C19 H34 N6 O4 S2  | POS | -1.64896 | DOWN | 0.099536 | 0.246523 |
| C19 H35 N O3 S2   | POS | 0.630472 | UP   | 0.533137 | 0.553484 |
| C19 H36 N10 O S3  | NEG | -0.79052 | DOWN | 0.434086 | 0.507854 |
| C19 H36 N10 O8 S  | NEG | -2.43789 | DOWN | 0.013426 | 0.071391 |
| C19 H36 N2 O8 S   | NEG | -1.67219 | DOWN | 0.094741 | 0.245671 |
| C19 H36 N4 O13    | POS | 0.215357 | UP   | 0.831676 | 0.660318 |
| C19 H36 N6 O S2   | NEG | -0.09643 | DOWN | 0.924192 | 0.681724 |
| C19 H36 O10 S     | POS | -1.78435 | DOWN | 0.074076 | 0.192357 |
| C19 H37 Cl N8 O5  | POS | -0.72546 | DOWN | 0.47305  | 0.524221 |
| C19 H37 N O4 S2   | POS | -0.49156 | DOWN | 0.627267 | 0.592627 |
| C19 H37 N7 O S3   | POS | -0.87313 | DOWN | 0.38732  | 0.485186 |
| C19 H37 N9 O5 S   | POS | 1.187267 | UP   | 0.238431 | 0.389573 |
| C19 H38 Cl N9 O7  | POS | 3.258774 | UP   | 0.000717 | 0.006772 |
| C19 H38 N12 S3    | POS | -0.57922 | DOWN | 0.567046 | 0.570423 |
| C19 H38 N16 S2    | NEG | -0.70013 | DOWN | 0.488707 | 0.531583 |
| C19 H38 N2 O S4   | NEG | 0.910862 | UP   | 0.366995 | 0.472279 |
| C19 H38 N2 O6 S2  | POS | -0.92308 | DOWN | 0.360552 | 0.475195 |
| C19 H38 N2 O8 S2  | POS | -1.4048  | DOWN | 0.161972 | 0.319971 |
| C19 H38 N4 O4 S2  | POS | -0.93168 | DOWN | 0.356064 | 0.465357 |
| C19 H39 N O13     | POS | -0.99813 | DOWN | 0.322524 | 0.450138 |
| C19 H39 N15 O5 S  | POS | -1.51038 | DOWN | 0.132152 | 0.288496 |
| C19 H39 N7 O10    | POS | 0.061089 | UP   | 0.951931 | 0.688768 |
| C19 H40 N12 S3    | POS | 1.355685 | UP   | 0.177418 | 0.333639 |
| C19 H40 N4 O3 S2  | POS | 1.478412 | UP   | 0.140707 | 0.297326 |
| C19 H43 N7 O12    | POS | 0.939789 | UP   | 0.35186  | 0.462407 |
| C19 H44 N10 O15   | POS | -1.24283 | DOWN | 0.216891 | 0.369102 |
| C19 H44 N10 O15   | NEG | -0.20629 | DOWN | 0.838668 | 0.662026 |
| C19 H44 N16 O9    | POS | -0.82607 | DOWN | 0.413585 | 0.499135 |
| C19 H46 N8 O13    | POS | -2.59499 | DOWN | 0.008249 | 0.049527 |
| C19 H47 N13 O4 S2 | POS | -2.61218 | DOWN | 0.007806 | 0.041619 |
| C19 H48 N8 S4     | POS | -0.93211 | DOWN | 0.35584  | 0.467673 |

|                        |     |          |      |          |          |
|------------------------|-----|----------|------|----------|----------|
| C20 H14 N2 O           | POS | 1.051292 | UP   | 0.29719  | 0.430556 |
| C20 H16 N4             | POS | 1.486149 | UP   | 0.138599 | 0.303034 |
| C20 H16 N4 O           | POS | -1.81073 | DOWN | 0.069778 | 0.190756 |
| C20 H18 N4 O           | POS | 1.060639 | UP   | 0.292873 | 0.407455 |
| C20 H20 N4 O           | NEG | -1.5293  | DOWN | 0.127277 | 0.274606 |
| C20 H21 Cl N2          | POS | -1.41028 | DOWN | 0.160312 | 0.321766 |
| C20 H23 N O2           | POS | -1.86525 | DOWN | 0.061528 | 0.185785 |
| C20 H23 N15            | POS | 1.27049  | UP   | 0.206692 | 0.361277 |
| C20 H23 N3 O           | POS | 1.619015 | UP   | 0.105993 | 0.247936 |
| C20 H24 O7             | POS | -0.5445  | DOWN | 0.590579 | 0.580801 |
| C20 H26 N10 O          | NEG | -0.40232 | DOWN | 0.691159 | 0.618081 |
| C20 H27 N S2           | POS | 0.008602 | UP   | 0.993228 | 0.697626 |
| C20 H29 Cl O3 S        | NEG | 0.39694  | UP   | 0.695087 | 0.617878 |
| C20 H29 N3 O6          | POS | -0.15281 | DOWN | 0.880126 | 0.673489 |
| C20 H30 N8 O4          | POS | -0.80721 | DOWN | 0.424388 | 0.511452 |
| C20 H30 O7 + 10.545896 | POS | -0.22691 | DOWN | 0.822786 | 0.658404 |
| C20 H31 N O S2         | POS | 1.378783 | UP   | 0.170027 | 0.331594 |
| C20 H31 N9 O3 S        | NEG | -0.33321 | DOWN | 0.742181 | 0.633967 |
| C20 H31 N9 S           | POS | 1.516946 | UP   | 0.130444 | 0.285197 |
| C20 H32 N10 S2         | POS | -0.94169 | DOWN | 0.350877 | 0.461799 |
| C20 H32 N14 O S        | POS | -3.56921 | DOWN | 0.000179 | 0.002828 |
| C20 H32 N2 O7 S        | NEG | -0.44292 | DOWN | 0.661789 | 0.604678 |
| C20 H32 O10            | POS | 0.84761  | UP   | 0.401437 | 0.495013 |
| C20 H33 N3 O9          | POS | -1.44892 | DOWN | 0.148961 | 0.306074 |
| C20 H34 N2 O8 S        | POS | 1.377521 | UP   | 0.170424 | 0.335568 |
| C20 H34 N6 O4 S2       | POS | -1.06137 | DOWN | 0.292538 | 0.424573 |
| C20 H34 S3             | NEG | 0.758213 | UP   | 0.453204 | 0.519443 |
| C20 H35 N19 O4         | POS | 1.140652 | UP   | 0.257601 | 0.408801 |
| C20 H35 N3 O3 S2       | POS | -1.43452 | DOWN | 0.15312  | 0.300689 |
| C20 H35 N9 S2          | POS | 2.17461  | UP   | 0.02834  | 0.106484 |
| C20 H36 Cl N23         | POS | 1.580104 | UP   | 0.114859 | 0.266408 |
| C20 H36 N10 O6 S       | NEG | -1.48786 | DOWN | 0.138136 | 0.288496 |
| C20 H36 N12 O7 S       | NEG | -1.05589 | DOWN | 0.29506  | 0.424284 |
| C20 H36 N2 O3 S3       | POS | 0.77744  | UP   | 0.441771 | 0.515202 |
| C20 H36 N4 O4 S        | POS | -0.24309 | DOWN | 0.810381 | 0.652781 |
| C20 H36 N6 S2          | POS | 2.429772 | UP   | 0.013756 | 0.063261 |
| C20 H37 N O9           | POS | -0.75325 | DOWN | 0.456183 | 0.519971 |
| C20 H37 N S3           | POS | 0.867272 | UP   | 0.390534 | 0.490114 |
| C20 H38 N2 O5 S2       | POS | 1.710828 | UP   | 0.087168 | 0.229858 |
| C20 H39 N3 O S3        | POS | 0.829473 | UP   | 0.41165  | 0.499184 |
| C20 H39 N5 O5 S2       | POS | 0.401064 | UP   | 0.692076 | 0.617979 |
| C20 H40 N4 O8 S        | POS | 0.690105 | UP   | 0.49498  | 0.535061 |
| C20 H40 N6 O14         | POS | 0.466163 | UP   | 0.645202 | 0.600976 |

|                     |     |          |      |          |          |
|---------------------|-----|----------|------|----------|----------|
| C20 H40 N6 S3       | POS | -0.59718 | DOWN | 0.555052 | 0.563937 |
| C20 H41 N3 O S3     | POS | 2.99269  | UP   | 0.002067 | 0.018537 |
| C20 H42 Cl N O S3   | POS | 0.235548 | UP   | 0.816158 | 0.652865 |
| C20 H42 N2 O S4     | POS | -1.75765 | DOWN | 0.078636 | 0.220893 |
| C20 H42 N6 S4       | POS | 1.755432 | UP   | 0.079024 | 0.211365 |
| C20 H43 N O8 S2     | POS | -0.25404 | DOWN | 0.80201  | 0.648928 |
| C20 H43 N11 O10     | POS | -0.25947 | DOWN | 0.797865 | 0.649729 |
| C20 H44 N12 O11 S   | POS | -1.03869 | DOWN | 0.303077 | 0.437477 |
| C20 H44 N8 O12      | POS | -0.71709 | DOWN | 0.478192 | 0.526895 |
| C20 H44 N8 O8 S     | POS | 0.716538 | UP   | 0.478533 | 0.529484 |
| C20 H45 N11 O7 S2   | POS | -0.49765 | DOWN | 0.623    | 0.592897 |
| C20 H45 N9 O12 S    | POS | -4.30742 | DOWN | 2.93E-06 | 0        |
| C20 H46 N8 O6 S3    | POS | 2.7781   | UP   | 0.004486 | 0.028289 |
| C20 H48 N14 O12     | POS | -0.01337 | DOWN | 0.989473 | 0.696901 |
| C20 H50 Cl N17 O S2 | POS | 0.886223 | UP   | 0.380192 | 0.484324 |
| C20 H50 N6 O2 S4    | POS | 1.159308 | UP   | 0.249808 | 0.392099 |
| C20 H51 N9 O11 S    | POS | 3.0725   | UP   | 0.001523 | 0.0173   |
| C21 H18 N4 O        | POS | 0.962723 | UP   | 0.340138 | 0.456368 |
| C21 H20 O S         | POS | 0.126603 | UP   | 0.900573 | 0.677091 |
| C21 H21 N O2        | POS | 0.168884 | UP   | 0.867629 | 0.667561 |
| C21 H21 N5 O2       | POS | 1.467515 | UP   | 0.143716 | 0.298528 |
| C21 H22 N4 S        | POS | -0.74    | DOWN | 0.464181 | 0.521414 |
| C21 H25 Cl N2       | POS | 1.972014 | UP   | 0.047652 | 0.151672 |
| C21 H26 N10         | POS | 1.784119 | UP   | 0.074113 | 0.209127 |
| C21 H30 N2 O4 S     | POS | 1.178607 | UP   | 0.241916 | 0.384678 |
| C21 H30 N2 O4 S     | NEG | 0.515931 | UP   | 0.610259 | 0.585126 |
| C21 H30 O2 S2       | NEG | 0.653064 | UP   | 0.518513 | 0.55064  |
| C21 H31 N13 O2      | POS | -0.66092 | DOWN | 0.513472 | 0.546689 |
| C21 H31 N27         | POS | 1.593958 | UP   | 0.111639 | 0.260393 |
| C21 H31 N5 O6 S     | POS | 0.880599 | UP   | 0.383244 | 0.481988 |
| C21 H32 N2 O2 S2    | POS | -0.76803 | DOWN | 0.447348 | 0.513657 |
| C21 H32 N2 O7 S     | NEG | 3.095928 | UP   | 0.001389 | 0.011099 |
| C21 H32 O6 S        | NEG | -1.26905 | DOWN | 0.207216 | 0.365067 |
| C21 H34 N6 S2       | POS | 0.380971 | UP   | 0.706789 | 0.620439 |
| C21 H35 N17 O5      | POS | 2.562186 | UP   | 0.009157 | 0.058528 |
| C21 H35 N5 O S2     | NEG | 3.55823  | UP   | 0.000188 | 0.003989 |
| C21 H35 N9 O2 S     | POS | 2.04787  | UP   | 0.039439 | 0.138622 |
| C21 H36 Cl2 N4 O2   | POS | -0.28859 | DOWN | 0.77574  | 0.643401 |
| C21 H36 N20 O S     | POS | -3.51592 | DOWN | 0.00023  | 0.00158  |
| C21 H36 N6 O S2     | NEG | 0.437248 | UP   | 0.665866 | 0.608277 |
| C21 H36 N8 O7       | POS | 0.795736 | UP   | 0.431042 | 0.516687 |
| C21 H36 O2 S2       | NEG | 0.782059 | UP   | 0.439048 | 0.512558 |
| C21 H38 O6 S2       | POS | 0.297665 | UP   | 0.768878 | 0.642274 |

|                           |     |          |      |          |          |
|---------------------------|-----|----------|------|----------|----------|
| C21 H39 N21 O4            | POS | 2.836875 | UP   | 0.003653 | 0.017926 |
| C21 H39 N7 O9             | POS | 0.643252 | UP   | 0.524839 | 0.55316  |
| C21 H40 N4 O10            | POS | 1.857839 | UP   | 0.062601 | 0.183867 |
| C21 H40 N6 O14            | POS | -0.60042 | DOWN | 0.552898 | 0.563406 |
| C21 H41 N9 O6 S           | POS | 0.038629 | UP   | 0.969594 | 0.692571 |
| C21 H42 N6 O6 S           | POS | 0.333823 | UP   | 0.741725 | 0.645224 |
| C21 H42 O12 S             | POS | -3.98409 | DOWN | 2.07E-05 | 0        |
| C21 H43 N15 O2 S2         | POS | 3.060179 | UP   | 0.001597 | 0.01186  |
| C21 H43 N7 O11            | POS | -0.14002 | DOWN | 0.890102 | 0.674107 |
| C21 H44 N12 S3            | POS | 0.324417 | UP   | 0.74876  | 0.63378  |
| C21 H44 N8 O3 S2          | POS | 0.181445 | UP   | 0.857882 | 0.666841 |
| C21 H45 N21 O3 S2         | POS | 3.812952 | UP   | 5.28E-05 | 0        |
| C21 H46 N4 O17            | POS | -1.29185 | DOWN | 0.199052 | 0.350305 |
| C21 H46 N6 O10 S          | POS | 1.549541 | UP   | 0.122213 | 0.277791 |
| C21 H48 N16 O10           | POS | -1.79259 | DOWN | 0.072711 | 0.202244 |
| C21 H48 N18 O8 S          | POS | -1.02483 | DOWN | 0.309637 | 0.440819 |
| C21 H49 Cl N6 O15         | POS | -1.1006  | DOWN | 0.274881 | 0.413512 |
| C21 H49 N13 O14           | POS | -0.89319 | DOWN | 0.376432 | 0.479788 |
| C21 H49 N5 O18            | POS | 1.91555  | UP   | 0.054632 | 0.167281 |
| C21 H49 N7 O15            | POS | 0.829815 | UP   | 0.411456 | 0.502334 |
| C21 H51 N15 O10 S2        | POS | 2.111826 | UP   | 0.033458 | 0.125104 |
| C21 H52 N12 O11 S2        | POS | 2.40577  | UP   | 0.014774 | 0.071111 |
| C22 H19 N3                | POS | 0.255016 | UP   | 0.801261 | 0.649386 |
| C22 H21 N5 O2             | POS | 1.182164 | UP   | 0.24048  | 0.386267 |
| C22 H22 O                 | POS | -0.06676 | DOWN | 0.947473 | 0.687116 |
| C22 H23 N5                | POS | -2.3361  | DOWN | 0.018102 | 0.078073 |
| C22 H23 N5 O              | POS | 0.756937 | UP   | 0.453968 | 0.519707 |
| C22 H24 N16 O + 3.8080628 | POS | -0.35904 | DOWN | 0.722968 | 0.632874 |
| C22 H24 N8 O              | POS | 3.303308 | UP   | 0.000594 | 0.005943 |
| C22 H26 N2 O              | NEG | -0.35147 | DOWN | 0.728582 | 0.623462 |
| C22 H26 O3 S              | NEG | 0.516461 | UP   | 0.609891 | 0.589558 |
| C22 H28 O4 + 10.355622    | POS | -2.45535 | DOWN | 0.012738 | 0.06852  |
| C22 H29 N O6              | POS | 1.187412 | UP   | 0.238373 | 0.383807 |
| C22 H30 N4 S              | NEG | 0.699252 | UP   | 0.489256 | 0.5345   |
| C22 H30 O S               | POS | 0.164031 | UP   | 0.8714   | 0.671746 |
| C22 H30 O9                | POS | 0.214238 | UP   | 0.832538 | 0.6608   |
| C22 H32 N10 O3            | POS | -0.05809 | DOWN | 0.954285 | 0.689554 |
| C22 H33 Cl N14 S          | POS | -2.12348 | DOWN | 0.032454 | 0.116245 |
| C22 H33 Cl N6 O           | POS | -1.00794 | DOWN | 0.317752 | 0.441359 |
| C22 H33 N13 O5            | POS | 2.803406 | UP   | 0.004109 | 0.02723  |
| C22 H33 N15 O             | POS | 1.498847 | UP   | 0.135192 | 0.29236  |
| C22 H34 N16 O2            | POS | -2.2897  | DOWN | 0.020656 | 0.092449 |
| C22 H34 N6 O S            | POS | -2.26862 | DOWN | 0.021914 | 0.091848 |

|                        |     |          |      |          |          |
|------------------------|-----|----------|------|----------|----------|
| C22 H34 O9             | POS | -1.66417 | DOWN | 0.096376 | 0.240608 |
| C22 H36 N2 O3 S2       | POS | 1.478474 | UP   | 0.14069  | 0.299071 |
| C22 H36 N2 O9 S        | POS | -0.75225 | DOWN | 0.45678  | 0.522845 |
| C22 H36 S3             | NEG | -0.38362 | DOWN | 0.70484  | 0.621174 |
| C22 H37 N3 O7          | POS | 0.610023 | UP   | 0.546547 | 0.558569 |
| C22 H38 N6 O S2        | NEG | 0.658251 | UP   | 0.515184 | 0.542442 |
| C22 H38 O2 S2          | NEG | -1.31143 | DOWN | 0.192227 | 0.347185 |
| C22 H39 N O3 S2        | NEG | -2.25129 | DOWN | 0.022996 | 0.094822 |
| C22 H39 N11 O S3       | NEG | 2.267767 | UP   | 0.021966 | 0.086916 |
| C22 H39 N21 S          | POS | -3.14939 | DOWN | 0.001123 | 0.011099 |
| C22 H40 N16 O5 S       | POS | 0.834405 | UP   | 0.408858 | 0.494758 |
| C22 H40 N2 O6 S2       | POS | 1.393757 | UP   | 0.165356 | 0.320071 |
| C22 H41 N5 O4 S2       | POS | -0.42531 | DOWN | 0.674475 | 0.609627 |
| C22 H41 N7 O5 S        | NEG | 0.069224 | UP   | 0.945539 | 0.686911 |
| C22 H42 N4 O S3        | POS | -0.86052 | DOWN | 0.394259 | 0.488855 |
| C22 H43 N5 S4          | POS | -1.19057 | DOWN | 0.237111 | 0.382693 |
| C22 H44 N18 O7 S       | POS | -4.25739 | DOWN | 4.04E-06 | 0        |
| C22 H44 N6 O11         | POS | -2.42466 | DOWN | 0.013968 | 0.064226 |
| C22 H44 N6 S4          | POS | -0.46258 | DOWN | 0.64775  | 0.600865 |
| C22 H45 N5 O9 S        | POS | 0.75084  | UP   | 0.45763  | 0.521675 |
| C22 H46 N6 O12         | POS | -4.0952  | DOWN | 1.09E-05 | 0        |
| C22 H48 N16 O3 S3      | POS | 1.522336 | UP   | 0.129055 | 0.287623 |
| C22 H52 N14 O13        | POS | 0.267799 | UP   | 0.791518 | 0.648125 |
| C23 H20 N10            | POS | -0.05009 | DOWN | 0.960581 | 0.691866 |
| C23 H20 O2             | POS | 0.410235 | UP   | 0.685398 | 0.614039 |
| C23 H20 O3 + 1.7308096 | POS | -0.86916 | DOWN | 0.389496 | 0.485883 |
| C23 H22 N4 O           | NEG | -2.14056 | DOWN | 0.031028 | 0.118832 |
| C23 H22 N4 O2          | POS | 0.388503 | UP   | 0.701261 | 0.618081 |
| C23 H22 O S            | NEG | -0.43543 | DOWN | 0.667173 | 0.605295 |
| C23 H24 O5 - 10.727    | NEG | -1.54222 | DOWN | 0.124026 | 0.277674 |
| C23 H25 Cl             | POS | 1.235008 | UP   | 0.219838 | 0.374285 |
| C23 H26 N10 O2         | NEG | 1.206098 | UP   | 0.230972 | 0.380202 |
| C23 H26 N4 O5          | POS | 0.273896 | UP   | 0.786881 | 0.647894 |
| C23 H26 N8 O           | POS | 0.875031 | UP   | 0.38628  | 0.485883 |
| C23 H28 N4 O5          | POS | -1.75031 | DOWN | 0.079928 | 0.211194 |
| C23 H29 N3 O3 S        | POS | 0.746112 | UP   | 0.460482 | 0.517135 |
| C23 H30 O S2           | NEG | 3.259275 | UP   | 0.000715 | 0.005943 |
| C23 H32 N14 O6         | POS | 0.303549 | UP   | 0.764439 | 0.639033 |
| C23 H32 N6 O5 S        | NEG | 1.57138  | UP   | 0.116923 | 0.274128 |
| C23 H33 N S2           | POS | -0.04938 | DOWN | 0.961136 | 0.689957 |
| C23 H34 N12 O4         | POS | 3.159318 | UP   | 0.001079 | 0.006772 |
| C23 H34 N2 O5          | POS | -0.27391 | DOWN | 0.786867 | 0.647865 |
| C23 H36 Cl N11         | POS | -0.79896 | DOWN | 0.429167 | 0.501061 |



|                     |     |          |      |          |          |
|---------------------|-----|----------|------|----------|----------|
| C23 H36 CI2         | NEG | -0.41806 | DOWN | 0.679721 | 0.61244  |
| C23 H36 S2          | POS | -0.10282 | DOWN | 0.919181 | 0.680258 |
| C23 H37 N11 O8      | POS | 0.587366 | UP   | 0.561592 | 0.568095 |
| C23 H37 N3 S3       | POS | -1.37032 | DOWN | 0.172709 | 0.329144 |
| C23 H38 N10 O2 S    | NEG | -0.88475 | DOWN | 0.380992 | 0.486417 |
| C23 H38 N6 O9       | NEG | -1.46271 | DOWN | 0.145059 | 0.300259 |
| C23 H38 N8 O3 S     | POS | -1.45043 | DOWN | 0.148528 | 0.312697 |
| C23 H40 O8 S        | POS | 0.776068 | UP   | 0.442581 | 0.51265  |
| C23 H41 N5 O8       | POS | -1.28563 | DOWN | 0.201253 | 0.350305 |
| C23 H42 N8 S4       | POS | 0.654773 | UP   | 0.517415 | 0.544319 |
| C23 H43 CI N2 O6    | POS | 0.450551 | UP   | 0.656328 | 0.600568 |
| C23 H43 N21 O5      | POS | 1.926175 | UP   | 0.053259 | 0.166487 |
| C23 H43 N7 O10      | POS | 1.551113 | UP   | 0.121826 | 0.279878 |
| C23 H44 N12 O3 S2   | POS | -1.01457 | DOWN | 0.314548 | 0.442637 |
| C23 H44 N16 O3 S2   | POS | -0.60429 | DOWN | 0.550336 | 0.564995 |
| C23 H44 N24 S2      | POS | 2.868468 | UP   | 0.003264 | 0.021889 |
| C23 H44 N6 O13      | POS | -0.98283 | DOWN | 0.330064 | 0.449621 |
| C23 H44 O15         | POS | 0.655562 | UP   | 0.516909 | 0.543007 |
| C23 H46 N20 O3 S2   | POS | 3.107595 | UP   | 0.001327 | 0.012591 |
| C23 H46 N8 O12      | POS | 3.617852 | UP   | 0.000141 | 0        |
| C23 H47 N3 O9 S2    | POS | -1.05714 | DOWN | 0.294484 | 0.428915 |
| C23 H47 N7 O12      | POS | 0.152495 | UP   | 0.880376 | 0.671946 |
| C23 H48 N6 O2 S4    | POS | -1.16931 | DOWN | 0.245698 | 0.387678 |
| C23 H50 CI N17 O S2 | POS | 0.038096 | UP   | 0.970012 | 0.692768 |
| C23 H52 N18 O7 S    | POS | 0.054788 | UP   | 0.956884 | 0.690692 |
| C23 H53 N7 O16 S    | POS | -0.39741 | DOWN | 0.694745 | 0.621607 |
| C24 H23 N5          | POS | 2.967918 | UP   | 0.002269 | 0.015317 |
| C24 H24 N2 O2       | POS | 2.203051 | UP   | 0.026248 | 0.107269 |
| C24 H25 N5 O2       | POS | 1.842952 | UP   | 0.064802 | 0.187505 |
| C24 H25 N5 O3       | POS | 0.210134 | UP   | 0.835701 | 0.661813 |
| C24 H26 CI N        | NEG | -1.4757  | DOWN | 0.141451 | 0.291935 |
| C24 H26 N2 O5       | POS | 1.978395 | UP   | 0.046911 | 0.150846 |
| C24 H27 CI O3       | NEG | -1.2989  | DOWN | 0.196572 | 0.346931 |
| C24 H27 N3 O S      | POS | 0.316115 | UP   | 0.754986 | 0.635208 |
| C24 H28 O5          | POS | 0.520797 | UP   | 0.606887 | 0.584926 |
| C24 H28 S           | NEG | -0.30036 | DOWN | 0.766846 | 0.638457 |
| C24 H30 N2 S2       | POS | 3.843878 | UP   | 4.48E-05 | 0.005943 |
| C24 H30 O8          | NEG | 1.535803 | UP   | 0.125632 | 0.282051 |
| C24 H31 CI N2       | NEG | -1.13454 | DOWN | 0.260191 | 0.403744 |
| C24 H31 CI N4 O     | POS | -1.06895 | DOWN | 0.289071 | 0.424718 |
| C24 H32 N6 O5       | POS | 0.936801 | UP   | 0.353405 | 0.474627 |
| C24 H32 N6 S2       | POS | -0.21536 | DOWN | 0.83167  | 0.658051 |
| C24 H32 O5          | POS | 0.070949 | UP   | 0.944184 | 0.686432 |

|                          |     |          |      |          |          |
|--------------------------|-----|----------|------|----------|----------|
| C24 H33 N O S2           | POS | 0.283729 | UP   | 0.77942  | 0.645428 |
| C24 H33 N17 O            | POS | -0.69825 | DOWN | 0.489884 | 0.536809 |
| C24 H34 N4 O2 S          | NEG | 0.088421 | UP   | 0.930469 | 0.68355  |
| C24 H35 N O7             | POS | 2.236153 | UP   | 0.023977 | 0.112354 |
| C24 H35 N25              | POS | -3.56635 | DOWN | 0.000181 | 0.002828 |
| C24 H36 N6 O2 S2         | POS | -0.56067 | DOWN | 0.579564 | 0.574164 |
| C24 H38 N10 S2           | POS | 1.373715 | UP   | 0.171629 | 0.334285 |
| C24 H39 Cl N6 O2 S       | NEG | 1.540849 | UP   | 0.124368 | 0.273649 |
| C24 H40 N10 O2 S2        | POS | -0.69266 | DOWN | 0.493379 | 0.534259 |
| C24 H40 N10 O7 S         | NEG | -0.37963 | DOWN | 0.707775 | 0.62997  |
| C24 H40 N2 O6 S2         | POS | -1.17913 | DOWN | 0.241704 | 0.383807 |
| C24 H40 N6 O4 S2         | NEG | 0.887944 | UP   | 0.379261 | 0.482534 |
| C24 H41 N3 O10           | POS | 1.570914 | UP   | 0.117034 | 0.2654   |
| C24 H41 N5 O7 S          | POS | -0.12509 | DOWN | 0.901757 | 0.677551 |
| C24 H42 N4 O7 S2         | POS | 0.471536 | UP   | 0.641391 | 0.599825 |
| C24 H43 N O14            | POS | -1.12738 | DOWN | 0.263244 | 0.402594 |
| C24 H43 N17 O5 S         | POS | 0.982041 | UP   | 0.330456 | 0.45149  |
| C24 H44 N14 O11          | NEG | -5.80468 | DOWN | 1.82E-12 | 0        |
| C24 H46 N6 O12           | POS | 0.049343 | UP   | 0.961165 | 0.690781 |
| C24 H47 N5 O8 S          | POS | -0.83618 | DOWN | 0.407858 | 0.493018 |
| C24 H50 N2 O3 S4         | NEG | 1.753221 | UP   | 0.079413 | 0.217586 |
| C24 H50 N2 O9 S2         | POS | 0.954415 | UP   | 0.344356 | 0.465058 |
| C24 H52 N12 O8 S2        | POS | -0.4833  | DOWN | 0.633082 | 0.596448 |
| C24 H53 N3 O3 S4         | POS | 1.319659 | UP   | 0.189407 | 0.346335 |
| C24 H57 N7 O17 S         | POS | -4.65121 | DOWN | 2.64E-07 | 0        |
| C25 H18                  | POS | -1.06687 | DOWN | 0.290017 | 0.424066 |
| C25 H22 N4 O2            | POS | 3.525011 | UP   | 0.00022  | 0.002828 |
| C25 H25 N S              | POS | -0.42186 | DOWN | 0.676967 | 0.610122 |
| C25 H27 N3 S             | POS | -0.33285 | DOWN | 0.742449 | 0.631017 |
| C25 H27 N9 O2            | POS | -0.46729 | DOWN | 0.644405 | 0.596977 |
| C25 H28 N2 O3            | POS | -0.85814 | DOWN | 0.395575 | 0.486257 |
| C25 H29 N15 O3           | NEG | -0.11905 | DOWN | 0.906477 | 0.672096 |
| C25 H29 N5 O4            | POS | 2.050401 | UP   | 0.039187 | 0.132156 |
| C25 H29 N9 O + 5.2830625 | POS | -2.0794  | DOWN | 0.036389 | 0.131681 |
| C25 H30 N2 O5            | POS | -3.32623 | DOWN | 0.000538 | 0.002828 |
| C25 H33 N3 O5 S          | POS | -0.64742 | DOWN | 0.522146 | 0.558478 |
| C25 H34 S2               | NEG | -2.8593  | DOWN | 0.003373 | 0.029321 |
| C25 H38 N2 O8            | POS | -0.2532  | DOWN | 0.802646 | 0.650837 |
| C25 H38 N24 S            | POS | 2.538957 | UP   | 0.009851 | 0.060604 |
| C25 H38 N8 O3 S          | NEG | -0.94181 | DOWN | 0.350818 | 0.464398 |
| C25 H38 N8 S3            | POS | 0.363143 | UP   | 0.719933 | 0.624415 |
| C25 H38 S3               | POS | 0.650094 | UP   | 0.520424 | 0.547427 |
| C25 H39 N21 O2           | POS | 2.221138 | UP   | 0.024986 | 0.102192 |

|                    |     |          |      |          |          |
|--------------------|-----|----------|------|----------|----------|
| C25 H40 N8 O3 S2   | POS | 2.61305  | UP   | 0.007784 | 0.046715 |
| C25 H41 N13 O6     | POS | -1.44682 | DOWN | 0.149562 | 0.313636 |
| C25 H41 N3 O3 S2   | POS | 0.849534 | UP   | 0.400363 | 0.493326 |
| C25 H42 N10 O5 S   | NEG | 1.997545 | UP   | 0.044744 | 0.150642 |
| C25 H43 N9 O5 S2   | POS | -4.11774 | DOWN | 9.54E-06 | 0        |
| C25 H44 N2 O2 S3   | POS | -0.24669 | DOWN | 0.807624 | 0.653229 |
| C25 H44 N6 O4 S2   | POS | 0.911042 | UP   | 0.366899 | 0.473199 |
| C25 H46 N6 O3 S2   | POS | 2.393639 | UP   | 0.015313 | 0.07083  |
| C25 H46 N8 O10     | POS | -1.40177 | DOWN | 0.162897 | 0.320071 |
| C25 H47 N21 O6     | POS | 0.457941 | UP   | 0.651052 | 0.605331 |
| C25 H47 N3 O7 S2   | POS | -0.09624 | DOWN | 0.924337 | 0.68299  |
| C25 H47 N7 O11     | POS | 1.981645 | UP   | 0.046537 | 0.149409 |
| C25 H48 N6 O2 S3   | NEG | -1.52961 | DOWN | 0.127197 | 0.276029 |
| C25 H48 N6 O3 S3   | POS | 0.391151 | UP   | 0.699321 | 0.621508 |
| C25 H51 N7 O13     | POS | 0.370519 | UP   | 0.714485 | 0.625949 |
| C25 H52 N2 O8 S3   | POS | -1.98143 | DOWN | 0.046562 | 0.153609 |
| C25 H52 N4 O12 S   | POS | 0.937083 | UP   | 0.353259 | 0.464218 |
| C25 H57 N11 O14    | POS | 0.372766 | UP   | 0.712828 | 0.622967 |
| C26 H20 N2 O       | POS | -1.1268  | DOWN | 0.263495 | 0.398005 |
| C26 H25 N5 O       | NEG | -0.03494 | DOWN | 0.972498 | 0.689263 |
| C26 H26 N2 S       | POS | -0.7116  | DOWN | 0.481586 | 0.530063 |
| C26 H26 O5         | POS | 0.599391 | UP   | 0.553582 | 0.560328 |
| C26 H28 N2 O3      | POS | 2.431183 | UP   | 0.013698 | 0.070546 |
| C26 H29 N9 S       | POS | 0.671645 | UP   | 0.506639 | 0.546365 |
| C26 H30 O S        | POS | 0.735331 | UP   | 0.467019 | 0.52362  |
| C26 H30 O S2       | POS | -0.96722 | DOWN | 0.33787  | 0.460333 |
| C26 H31 N3 O4 S    | POS | -2.72529 | DOWN | 0.005373 | 0.032264 |
| C26 H32 N6 O2      | POS | -0.70012 | DOWN | 0.488713 | 0.539596 |
| C26 H34 N6 O2 S    | POS | 0.708359 | UP   | 0.483591 | 0.53321  |
| C26 H34 N8 O5      | POS | 2.181218 | UP   | 0.027842 | 0.105957 |
| C26 H35 N9 O4 S    | POS | -0.36964 | DOWN | 0.715133 | 0.624938 |
| C26 H36 N4 O S     | POS | -0.42667 | DOWN | 0.673492 | 0.613032 |
| C26 H37 Cl N2 O2 S | POS | -1.12948 | DOWN | 0.262345 | 0.400196 |
| C26 H37 N9 O5 S    | POS | 0.655259 | UP   | 0.517103 | 0.543945 |
| C26 H38 N14 S      | POS | -0.37193 | DOWN | 0.713444 | 0.623363 |
| C26 H40 N10 O5     | POS | -0.23887 | DOWN | 0.813613 | 0.653508 |
| C26 H40 N2 O3 S2   | NEG | -0.65146 | DOWN | 0.519547 | 0.545902 |
| C26 H40 N2 O8      | NEG | -3.46846 | DOWN | 0.000286 | 0.005021 |
| C26 H40 N6 O10     | POS | 1.707633 | UP   | 0.087775 | 0.231722 |
| C26 H41 N3 O9      | POS | -0.21913 | DOWN | 0.828768 | 0.659053 |
| C26 H42 O12        | POS | -0.44093 | DOWN | 0.663218 | 0.609733 |
| C26 H43 N O11      | POS | -1.59913 | DOWN | 0.110454 | 0.259871 |
| C26 H44 N12 O S3   | NEG | 1.627203 | UP   | 0.104196 | 0.247231 |

|                   |     |          |      |          |          |
|-------------------|-----|----------|------|----------|----------|
| C26 H44 N18 S2    | POS | 2.161787 | UP   | 0.029328 | 0.110351 |
| C26 H44 N2 O8 S   | POS | 0.837345 | UP   | 0.407199 | 0.499184 |
| C26 H45 N13 O2 S2 | NEG | 2.464511 | UP   | 0.01239  | 0.06486  |
| C26 H45 N17 S2    | POS | 2.687271 | UP   | 0.006104 | 0.038882 |
| C26 H46 N14 O5 S  | POS | -4.72356 | DOWN | 1.51E-07 | 0        |
| C26 H47 N3 O12 S  | POS | 0.574344 | UP   | 0.570326 | 0.565039 |
| C26 H47 N5 O11    | POS | 0.287366 | UP   | 0.776665 | 0.643902 |
| C26 H48 N10 S4    | POS | -3.71392 | DOWN | 8.79E-05 | 0        |
| C26 H50 N4 O3 S3  | POS | -2.28485 | DOWN | 0.02094  | 0.08307  |
| C26 H50 N6 O13    | POS | 0.305978 | UP   | 0.76261  | 0.639245 |
| C26 H55 N3 O3 S4  | POS | -3.03403 | DOWN | 0.001767 | 0.016657 |
| C26 H57 N11 O S5  | POS | 1.956424 | UP   | 0.049502 | 0.16589  |
| C27 H22 N4 O      | POS | 1.886538 | UP   | 0.058529 | 0.153392 |
| C27 H25 N7        | POS | -0.29104 | DOWN | 0.773884 | 0.642304 |
| C27 H27 N5 O      | POS | 2.702153 | UP   | 0.005808 | 0.023877 |
| C27 H28 N2 O      | POS | 0.081014 | UP   | 0.936281 | 0.685171 |
| C27 H30 O5        | POS | 1.457417 | UP   | 0.146547 | 0.296124 |
| C27 H31 N O S     | POS | -1.08058 | DOWN | 0.283803 | 0.422684 |
| C27 H31 N O5      | POS | -0.85178 | DOWN | 0.399107 | 0.491935 |
| C27 H31 N5 O S    | POS | 1.30471  | UP   | 0.194549 | 0.345907 |
| C27 H33 N5 O3     | POS | 0.549214 | UP   | 0.587357 | 0.582023 |
| C27 H34 N10 O5    | POS | 0.359309 | UP   | 0.722771 | 0.633062 |
| C27 H34 N6 O S2   | NEG | -1.06754 | DOWN | 0.289711 | 0.423122 |
| C27 H36 Cl N3 O S | POS | -0.66246 | DOWN | 0.512488 | 0.554501 |
| C27 H36 N2 O6 S   | POS | -1.90996 | DOWN | 0.055365 | 0.169634 |
| C27 H38 N4 O7 S   | POS | -0.76567 | DOWN | 0.448752 | 0.516283 |
| C27 H39 N19 O6    | POS | 0.045127 | UP   | 0.964482 | 0.691291 |
| C27 H39 N23 S     | POS | 2.948028 | UP   | 0.002443 | 0.021889 |
| C27 H40 N4 O5 S2  | NEG | 0.009486 | UP   | 0.992532 | 0.697859 |
| C27 H40 N6 O S2   | POS | 1.327934 | UP   | 0.186603 | 0.347185 |
| C27 H41 N O S2    | POS | -0.80334 | DOWN | 0.426625 | 0.505571 |
| C27 H42 N2 O6 S2  | POS | 1.578126 | UP   | 0.115324 | 0.267285 |
| C27 H43 N21 O3    | POS | 1.826534 | UP   | 0.0673   | 0.192887 |
| C27 H44 Cl2 O6    | POS | -2.6915  | DOWN | 0.006018 | 0.030821 |
| C27 H44 N16 O4 S  | POS | -0.53117 | DOWN | 0.599728 | 0.580964 |
| C27 H45 N19 O3 S2 | POS | -2.06539 | DOWN | 0.037719 | 0.130727 |
| C27 H48 N2 O S3   | POS | -0.72381 | DOWN | 0.474057 | 0.527567 |
| C27 H48 N2 O15    | POS | -4.17061 | DOWN | 6.93E-06 | 0        |
| C27 H48 N2 O7 S2  | POS | 2.527716 | UP   | 0.010202 | 0.064226 |
| C27 H48 N4 O4 S3  | POS | -4.67577 | DOWN | 2.19E-07 | 0        |
| C27 H49 N O2 S3   | POS | -1.346   | DOWN | 0.180585 | 0.331781 |
| C27 H50 N6 O3 S3  | POS | -1.01006 | DOWN | 0.316722 | 0.446817 |
| C27 H50 N8 O11    | POS | -1.67319 | DOWN | 0.094539 | 0.240461 |

|                     |     |          |      |          |          |
|---------------------|-----|----------|------|----------|----------|
| C27 H51 CI N10 O7 S | POS | 1.209829 | UP   | 0.229514 | 0.382133 |
| C27 H51 N O3 S3     | POS | -0.1095  | DOWN | 0.913951 | 0.680756 |
| C27 H54 N10 O8 S2   | POS | -0.35187 | DOWN | 0.728289 | 0.62834  |
| C27 H54 N4 O2 S4    | POS | 1.316056 | UP   | 0.190637 | 0.341307 |
| C27 H55 N7 O14      | POS | 0.699352 | UP   | 0.489193 | 0.530434 |
| C27 H58 N2 O3 S5    | POS | -0.05052 | DOWN | 0.960237 | 0.69107  |
| C28 H24 O           | POS | -2.84471 | DOWN | 0.003553 | 0.02669  |
| C28 H30 N4 O2 S     | POS | -0.73404 | DOWN | 0.467808 | 0.526769 |
| C28 H31 N5 O S      | POS | -0.36344 | DOWN | 0.719714 | 0.619028 |
| C28 H32 N22 O       | POS | 0.85179  | UP   | 0.399104 | 0.48427  |
| C28 H33 N11         | POS | -0.2927  | DOWN | 0.772633 | 0.642155 |
| C28 H36 O6 S        | POS | -1.49968 | DOWN | 0.13497  | 0.284417 |
| C28 H37 N3 O6       | POS | 0.274262 | UP   | 0.786603 | 0.648699 |
| C28 H40 N2 O S3     | POS | 0.555559 | UP   | 0.583035 | 0.575382 |
| C28 H40 O7 S        | POS | -2.18157 | DOWN | 0.027816 | 0.113095 |
| C28 H41 CI N12      | POS | 0.812708 | UP   | 0.421223 | 0.500323 |
| C28 H43 N3 O7 S     | NEG | 1.903536 | UP   | 0.056219 | 0.167281 |
| C28 H44 N8 O4 S2    | NEG | 0.752527 | UP   | 0.456615 | 0.517135 |
| C28 H44 O11 S       | POS | -0.30179 | DOWN | 0.765766 | 0.638639 |
| C28 H45 N3 O10      | POS | -0.14509 | DOWN | 0.886141 | 0.674379 |
| C28 H45 N3 O11      | POS | 0.201295 | UP   | 0.842522 | 0.662238 |
| C28 H46 N4 S3       | POS | -1.19196 | DOWN | 0.236558 | 0.380525 |
| C28 H51 N13 O9      | POS | 1.214368 | UP   | 0.227748 | 0.379472 |
| C28 H52 N16 O4 S2   | POS | -0.51938 | DOWN | 0.607867 | 0.587156 |
| C28 H54 N6 O14      | POS | 0.536486 | UP   | 0.596069 | 0.579901 |
| C28 H56 N6 O10 S2   | POS | -0.75324 | DOWN | 0.456185 | 0.517045 |
| C28 H60 N2 O8 S4    | POS | 1.354767 | UP   | 0.177716 | 0.329712 |
| C29 H36 N4 O3 S     | POS | -0.38308 | DOWN | 0.70524  | 0.621973 |
| C29 H37 N7 O S      | NEG | -0.55707 | DOWN | 0.582009 | 0.577093 |
| C29 H37 N9 O3       | POS | 0.341484 | UP   | 0.736011 | 0.628243 |
| C29 H38 O3 S        | NEG | 0.007727 | UP   | 0.993917 | 0.697732 |
| C29 H38 O4 S        | NEG | 2.612937 | UP   | 0.007787 | 0.045899 |
| C29 H40 N4 O7 S     | POS | -3.51381 | DOWN | 0.000232 | 0.002828 |
| C29 H42 N2 S2       | POS | -0.52104 | DOWN | 0.60672  | 0.582469 |
| C29 H43 N7 O3 S     | POS | -0.11416 | DOWN | 0.910303 | 0.679066 |
| C29 H45 N15 O7 S    | NEG | -2.4382  | DOWN | 0.013413 | 0.067327 |
| C29 H46 N4 O6 S     | POS | 0.803452 | UP   | 0.426562 | 0.50466  |
| C29 H46 O3 S3       | POS | 0.90666  | UP   | 0.369226 | 0.471182 |
| C29 H48 N2 O10      | POS | -2.14085 | DOWN | 0.031003 | 0.123092 |
| C29 H48 N6 O11 S    | POS | 1.093067 | UP   | 0.278216 | 0.409247 |
| C29 H50 N18 O2 S2   | POS | 1.148676 | UP   | 0.254229 | 0.396029 |
| C29 H50 N2 O8 S2    | NEG | -0.47526 | DOWN | 0.638758 | 0.598556 |
| C29 H55 N3 O14      | POS | 2.537613 | UP   | 0.009892 | 0.054144 |

|                           |     |          |      |          |          |
|---------------------------|-----|----------|------|----------|----------|
| C29 H56 N2 O15 S          | POS | 3.541189 | UP   | 0.000204 | 0.002828 |
| C3 H10 N2 O3 S            | POS | 0.140273 | UP   | 0.889901 | 0.673464 |
| C3 H10 N2 O3 S            | NEG | 1.179942 | UP   | 0.241376 | 0.391531 |
| C3 H10 N2 O5              | POS | -1.02795 | DOWN | 0.308152 | 0.440616 |
| C3 H10 N2 O6              | POS | -0.20515 | DOWN | 0.839546 | 0.660184 |
| C3 H10 N6 S               | POS | 1.202477 | UP   | 0.232394 | 0.376937 |
| C3 H10 N8                 | POS | -2.95886 | DOWN | 0.002347 | 0.013969 |
| C3 H12 N4 O4              | POS | -0.91666 | DOWN | 0.36393  | 0.472452 |
| C3 H12 N6 O S + 7.8712277 | POS | 1.827224 | UP   | 0.067194 | 0.184917 |
| C3 H13 N7 S               | POS | 1.298673 | UP   | 0.196653 | 0.345651 |
| C3 H6 O                   | POS | -0.73892 | DOWN | 0.464836 | 0.522066 |
| C3 H6 O2                  | NEG | -2.66075 | DOWN | 0.006663 | 0.046715 |
| C3 H6 O2 + 0.20226668     | POS | -0.14783 | DOWN | 0.88401  | 0.672769 |
| C3 H6 O3 - 1.1123182      | NEG | -0.48869 | DOWN | 0.629286 | 0.596372 |
| C3 H6 O3 - 6.876823       | NEG | -0.06234 | DOWN | 0.950946 | 0.688159 |
| C3 H7 N O                 | POS | 0.091805 | UP   | 0.927815 | 0.682944 |
| C3 H7 N O2                | POS | -0.32718 | DOWN | 0.746691 | 0.635456 |
| C3 H8 N2 O4               | POS | -3.34663 | DOWN | 0.000492 | 0.005021 |
| C3 H8 O3                  | POS | 0.09314  | UP   | 0.926768 | 0.683759 |
| C3 H9 Cl N4 O             | NEG | -1.20426 | DOWN | 0.231694 | 0.378903 |
| C3 H9 N O                 | POS | 2.096479 | UP   | 0.034819 | 0.128798 |
| C3 H9 N7 S                | POS | -3.39923 | DOWN | 0.000391 | 0.003989 |
| C30 H26 N2 O              | POS | -4.16987 | DOWN | 6.96E-06 | 0.00158  |
| C30 H28 N4 O3             | NEG | -2.48254 | DOWN | 0.011728 | 0.061615 |
| C30 H28 O S               | POS | 1.310739 | UP   | 0.192463 | 0.343667 |
| C30 H32 N12 + 10.165411   | POS | 2.294628 | UP   | 0.020371 | 0.081097 |
| C30 H36 O2 S              | POS | 3.418987 | UP   | 0.000358 | 0.003989 |
| C30 H36 O5 S              | NEG | -0.78975 | DOWN | 0.434536 | 0.509499 |
| C30 H38 N2 O6 S           | NEG | 0.139742 | UP   | 0.890315 | 0.671921 |
| C30 H40 N4 O7 S           | POS | -1.15466 | DOWN | 0.251734 | 0.39331  |
| C30 H42 N2 O2 S3          | POS | -0.04641 | DOWN | 0.963473 | 0.691513 |
| C30 H44 N18 O S2          | POS | -1.44253 | DOWN | 0.150795 | 0.301225 |
| C30 H44 N18 O3            | POS | -4.2544  | DOWN | 4.11E-06 | 0        |
| C30 H45 N3 O9             | POS | -0.31535 | DOWN | 0.755562 | 0.637452 |
| C30 H45 N9 O7 S           | NEG | 4.058679 | UP   | 1.35E-05 | 0        |
| C30 H46 N6 O3 S3          | POS | 0.694382 | UP   | 0.4923   | 0.533897 |
| C30 H46 O9                | POS | 0.391726 | UP   | 0.6989   | 0.626371 |
| C30 H49 N3 O11            | POS | 0.217791 | UP   | 0.829802 | 0.657834 |
| C30 H52 N2 O2 S3          | POS | 0.209386 | UP   | 0.836278 | 0.659053 |
| C30 H52 N2 O8 S2          | NEG | 0.792113 | UP   | 0.433155 | 0.512925 |
| C30 H55 N11 O11           | POS | 2.172121 | UP   | 0.02853  | 0.108821 |
| C30 H55 N3 O5 S4          | POS | 1.120333 | UP   | 0.266274 | 0.404583 |
| C30 H58 N6 O15            | POS | -1.26014 | DOWN | 0.210467 | 0.363224 |

|                            |     |          |      |          |          |
|----------------------------|-----|----------|------|----------|----------|
| C30 H61 N5 O S5            | POS | 2.931669 | UP   | 0.002595 | 0.023877 |
| C31 H28 N4 O3              | POS | -2.37789 | DOWN | 0.016037 | 0.070546 |
| C31 H33 N S                | POS | 1.062846 | UP   | 0.29186  | 0.420778 |
| C31 H34 Cl N9 O            | POS | -0.05965 | DOWN | 0.95306  | 0.688836 |
| C31 H34 N12 O4             | POS | -1.10889 | DOWN | 0.271242 | 0.413367 |
| C31 H34 N22 + 12.284333    | POS | 0.097947 | UP   | 0.923    | 0.680922 |
| C31 H36 N14 O4             | POS | 0.01526  | UP   | 0.987986 | 0.696859 |
| C31 H36 N4 O S             | POS | -0.41836 | DOWN | 0.6795   | 0.6139   |
| C31 H40 N10 O4             | POS | -0.52918 | DOWN | 0.601097 | 0.584685 |
| C31 H40 N4 O2 S2           | POS | 0.640026 | UP   | 0.526928 | 0.553577 |
| C31 H42 O5 S               | NEG | 1.614859 | UP   | 0.106914 | 0.254417 |
| C31 H42 O6 S               | NEG | -1.14067 | DOWN | 0.257592 | 0.403897 |
| C31 H43 N11 O S2           | POS | 0.057905 | UP   | 0.954434 | 0.68843  |
| C31 H43 N3 O3 S2           | POS | 2.826628 | UP   | 0.003787 | 0.021889 |
| C31 H44 N2 O11             | NEG | -0.11228 | DOWN | 0.911771 | 0.679305 |
| C31 H44 N2 O8 S            | POS | 2.616086 | UP   | 0.007708 | 0.044227 |
| C31 H44 O4 S2              | POS | -2.97369 | DOWN | 0.00222  | 0.021365 |
| C31 H46 N18 S              | NEG | 1.63903  | UP   | 0.101643 | 0.248357 |
| C31 H46 N4 O S2            | POS | 0.937951 | UP   | 0.35281  | 0.467141 |
| C31 H50 N2 O10             | POS | -0.44018 | DOWN | 0.663757 | 0.608597 |
| C31 H51 N5 O2 S3           | POS | 3.328089 | UP   | 0.000534 | 0.008611 |
| C31 H52 N2 O13             | POS | 1.581545 | UP   | 0.114521 | 0.288169 |
| C31 H54 N2 O8 S2           | NEG | -0.46457 | DOWN | 0.646336 | 0.598593 |
| C31 H56 N8 O10 S           | POS | -0.86764 | DOWN | 0.390334 | 0.486417 |
| C31 H61 Cl3 N6 O S2        | POS | -0.49157 | DOWN | 0.627258 | 0.591118 |
| C32 H28 N6 O2 + 3.4709504  | POS | -0.48068 | DOWN | 0.634929 | 0.592936 |
| C32 H31 N O3               | POS | 0.855029 | UP   | 0.397302 | 0.489118 |
| C32 H36 N2 O S2            | POS | -0.68413 | DOWN | 0.498737 | 0.538255 |
| C32 H36 N20 O              | POS | -4.42746 | DOWN | 1.32E-06 | 0        |
| C32 H36 N8 S               | POS | -0.96697 | DOWN | 0.337996 | 0.449297 |
| C32 H40 N6 O5              | POS | 0.644214 | UP   | 0.524218 | 0.553993 |
| C32 H41 N O4 S             | POS | -3.8997  | DOWN | 3.31E-05 | 0        |
| C32 H43 N3 O6              | POS | 0.179909 | UP   | 0.859073 | 0.665416 |
| C32 H44 N10 O6 S           | NEG | 1.151323 | UP   | 0.253123 | 0.394434 |
| C32 H44 N4 O7 S            | POS | 0.437641 | UP   | 0.665584 | 0.60792  |
| C32 H45 N3 O8              | POS | 1.989832 | UP   | 0.045607 | 0.152082 |
| C32 H46 N8 O4 S            | POS | -2.54745 | DOWN | 0.009592 | 0.056376 |
| C32 H48 N6 O4 S            | POS | -0.31582 | DOWN | 0.755206 | 0.635764 |
| C32 H48 N6 O9              | POS | -0.20926 | DOWN | 0.836373 | 0.661228 |
| C32 H48 O4 S2              | NEG | 0.47407  | UP   | 0.639596 | 0.596031 |
| C32 H49 Cl3 N4 O           | POS | 1.140961 | UP   | 0.25747  | 0.39595  |
| C32 H49 N3 O10 + 11.723135 | POS | 1.222248 | UP   | 0.224705 | 0.374285 |
| C32 H50 O8 S               | POS | -0.09183 | DOWN | 0.927792 | 0.68299  |

|                  |     |          |      |          |          |
|------------------|-----|----------|------|----------|----------|
| C32 H52 N12 O5 S | POS | -1.4346  | DOWN | 0.153097 | 0.306489 |
| C32 H52 N12 O6 S | POS | -2.5198  | DOWN | 0.010457 | 0.057462 |
| C32 H52 N6 O4 S3 | POS | 1.284439 | UP   | 0.201679 | 0.35662  |
| C32 H53 N3 O12   | POS | 0.836704 | UP   | 0.40756  | 0.499184 |
| C33 H27 N O2     | POS | -3.27874 | DOWN | 0.000659 | 0.00158  |
| C33 H42 N12 O7   | POS | -0.11404 | DOWN | 0.910396 | 0.681016 |
| C33 H45 N O11    | POS | 0.745545 | UP   | 0.460824 | 0.524006 |
| C33 H45 N7 O4 S  | POS | 0.272937 | UP   | 0.78761  | 0.647433 |
| C33 H48 N2 O10   | POS | -0.0409  | DOWN | 0.967806 | 0.692461 |
| C33 H48 N2 O6 S  | POS | -0.37066 | DOWN | 0.714383 | 0.624906 |
| C33 H51 N O8 S2  | POS | 0.828546 | UP   | 0.412177 | 0.497838 |
| C33 H52 N2 O8 S2 | POS | -0.07631 | DOWN | 0.939971 | 0.685539 |
| C33 H54 N10 O8 S | NEG | -2.19258 | DOWN | 0.027003 | 0.111608 |
| C33 H54 N14 S3   | POS | 1.21133  | UP   | 0.228929 | 0.380283 |
| C33 H54 O5 S3    | POS | 0.787842 | UP   | 0.435653 | 0.512098 |
| C33 H57 N5 O11 S | POS | -0.75607 | DOWN | 0.454488 | 0.515608 |
| C33 H58 N2 O8 S2 | NEG | 1.071947 | UP   | 0.287706 | 0.424573 |
| C33 H60 N6 O8 S2 | POS | 1.108287 | UP   | 0.271507 | 0.416537 |
| C34 H26 O        | POS | 0.515831 | UP   | 0.610328 | 0.61869  |
| C34 H28 N2 O     | POS | -2.6224  | DOWN | 0.007552 | 0.045485 |
| C34 H33 N3 O3    | POS | -0.9893  | DOWN | 0.326865 | 0.449037 |
| C34 H36 N4 O2 S  | POS | 2.627971 | UP   | 0.007417 | 0.046308 |
| C34 H39 N S2     | POS | -1.4309  | DOWN | 0.154177 | 0.319368 |
| C34 H42 N6 O4    | NEG | 0.872281 | UP   | 0.387784 | 0.485025 |
| C34 H43 N O2 S2  | POS | -0.11658 | DOWN | 0.908412 | 0.678514 |
| C34 H43 N9 O5    | POS | 0.280877 | UP   | 0.781582 | 0.645603 |
| C34 H44 N6 O6    | POS | 1.468334 | UP   | 0.143488 | 0.304928 |
| C34 H44 N8 O9    | POS | -0.03713 | DOWN | 0.970774 | 0.693184 |
| C34 H48 O7 S     | POS | 2.776784 | UP   | 0.004506 | 0.034108 |
| C34 H49 N3 O9    | POS | 2.476455 | UP   | 0.011948 | 0.060263 |
| C34 H49 N3 O9 S  | POS | 3.685256 | UP   | 0.000102 | 0        |
| C34 H53 N3 O11   | POS | 1.560108 | UP   | 0.119631 | 0.272928 |
| C34 H57 N3 O13   | POS | 1.027334 | UP   | 0.308443 | 0.438027 |
| C35 H28 N4       | POS | -0.0148  | DOWN | 0.988348 | 0.696581 |
| C35 H46 N14 O3 S | NEG | -1.25055 | DOWN | 0.21401  | 0.360167 |
| C35 H49 N13 O5   | POS | 0.65029  | UP   | 0.520298 | 0.54715  |
| C35 H49 N9 O6 S  | POS | 3.069186 | UP   | 0.001543 | 0.01186  |
| C35 H52 N6 O5 S2 | POS | -2.26869 | DOWN | 0.021909 | 0.093047 |
| C35 H52 N8 O3 S3 | NEG | -0.43088 | DOWN | 0.670453 | 0.608526 |
| C35 H52 O6 S2    | POS | 2.978341 | UP   | 0.002182 | 0.019711 |
| C36 H26 N2       | POS | -1.18258 | DOWN | 0.240312 | 0.383807 |
| C36 H37 Cl       | POS | 3.006892 | UP   | 0.001959 | 0.021889 |
| C36 H38 N12      | POS | -0.05639 | DOWN | 0.955623 | 0.689016 |



|                       |     |          |      |          |          |
|-----------------------|-----|----------|------|----------|----------|
| C36 H41 N O2 S2       | POS | 1.077754 | UP   | 0.285075 | 0.422757 |
| C36 H43 N5 O3 S       | POS | -4.81743 | DOWN | 7.13E-08 | 0        |
| C36 H48 N6 O7         | POS | -0.11772 | DOWN | 0.907521 | 0.677671 |
| C36 H50 N2 O7 S       | POS | 1.002676 | UP   | 0.320308 | 0.445367 |
| C36 H52 O8 S          | POS | 1.850885 | UP   | 0.063622 | 0.186992 |
| C36 H53 N3 O10        | POS | 2.463353 | UP   | 0.012434 | 0.060604 |
| C36 H56 N6 O11        | POS | 0.023071 | UP   | 0.981837 | 0.694903 |
| C36 H57 N3 O12        | POS | 1.265351 | UP   | 0.20856  | 0.360936 |
| C37 H32 N6 O          | POS | 0.09041  | UP   | 0.928909 | 0.683968 |
| C37 H39 N13           | POS | -1.70007 | DOWN | 0.089227 | 0.241048 |
| C37 H42 O4            | POS | -0.87874 | DOWN | 0.384255 | 0.488486 |
| C37 H43 N9 O7         | NEG | -0.49014 | DOWN | 0.628268 | 0.59309  |
| C37 H45 N O S2        | POS | 2.998639 | UP   | 0.002022 | 0.021365 |
| C37 H48 N8 O6 S       | POS | -1.22614 | DOWN | 0.223214 | 0.363897 |
| C37 H49 Cl N2 O3 S    | NEG | -0.81575 | DOWN | 0.419475 | 0.503161 |
| C37 H50 N2 O7 S       | POS | -0.07566 | DOWN | 0.940483 | 0.683177 |
| C37 H50 N8 O S2       | POS | 0.441811 | UP   | 0.662589 | 0.608847 |
| C37 H53 N7 O4 S2      | POS | 1.725145 | UP   | 0.084485 | 0.220236 |
| C37 H55 Cl N2 O8      | POS | 0.38508  | UP   | 0.703771 | 0.622039 |
| C37 H56 Cl N O2 S2    | POS | 1.608857 | UP   | 0.108255 | 0.253468 |
| C38 H30 N4 O          | POS | 0.213756 | UP   | 0.83291  | 0.658485 |
| C38 H33 N O           | POS | -0.9416  | DOWN | 0.350925 | 0.467318 |
| C38 H42 Cl N O        | POS | -1.65748 | DOWN | 0.097757 | 0.242361 |
| C38 H42 O9            | POS | 0.60998  | UP   | 0.546576 | 0.555192 |
| C38 H47 N9 O5         | POS | -0.15997 | DOWN | 0.87456  | 0.670059 |
| C38 H48 N2 O S2       | NEG | 0.941579 | UP   | 0.350936 | 0.460762 |
| C38 H48 O12           | POS | 0.824907 | UP   | 0.414245 | 0.501699 |
| C38 H48 O3 S          | POS | 1.355543 | UP   | 0.177464 | 0.333362 |
| C38 H50 O S3          | POS | -3.85698 | DOWN | 4.18E-05 | 0.00158  |
| C38 H52 N6 O8         | POS | 0.551677 | UP   | 0.585678 | 0.579161 |
| C38 H52 O6 S2         | NEG | -0.05495 | DOWN | 0.95676  | 0.689509 |
| C38 H54 O5 S2         | POS | 0.057173 | UP   | 0.955009 | 0.691358 |
| C38 H56 O9 S          | POS | 1.325593 | UP   | 0.187393 | 0.351388 |
| C38 H57 Cl N2 O S3    | POS | 0.41801  | UP   | 0.679754 | 0.61044  |
| C39 H45 N11 O2 S      | POS | 3.391673 | UP   | 0.000404 | 0.006772 |
| C39 H46 O4 S2         | POS | 1.690837 | UP   | 0.091025 | 0.232647 |
| C39 H47 N O2 S2       | POS | -1.45904 | DOWN | 0.146089 | 0.307522 |
| C39 H48 O3 S2         | NEG | 0.447737 | UP   | 0.658341 | 0.602487 |
| C39 H49 N O2 S2       | POS | -0.99424 | DOWN | 0.324431 | 0.449297 |
| C39 H50 O13           | POS | 1.421184 | UP   | 0.157047 | 0.307419 |
| C4 H10 N2 S           | POS | -1.52355 | DOWN | 0.128742 | 0.28352  |
| C4 H10 O3 + 5.2717648 | POS | -0.82141 | DOWN | 0.416239 | 0.503016 |
| C4 H11 N O2           | POS | 0.571279 | UP   | 0.57239  | 0.571961 |

|                         |     |          |      |          |          |
|-------------------------|-----|----------|------|----------|----------|
| C4 H12 N2 O2 S          | POS | -2.02479 | DOWN | 0.041804 | 0.144347 |
| C4 H12 N2 O3 S          | POS | 0.741283 | UP   | 0.463404 | 0.525372 |
| C4 H12 N2 O3 S          | NEG | 1.351818 | UP   | 0.178678 | 0.329712 |
| C4 H13 N3 O4 S          | POS | 0.140637 | UP   | 0.889617 | 0.674231 |
| C4 H14 N4 O4 S          | POS | -1.79037 | DOWN | 0.073077 | 0.190577 |
| C4 H3 N3 O              | POS | 1.211188 | UP   | 0.228984 | 0.392261 |
| C4 H4 O2                | POS | -0.28664 | DOWN | 0.777218 | 0.642215 |
| C4 H4 O3 - 0.469625     | NEG | -1.03701 | DOWN | 0.303864 | 0.439257 |
| C4 H5 N3 O2             | NEG | 0.226501 | UP   | 0.823103 | 0.658756 |
| C4 H6 N6 + 0.6443889    | POS | -0.77545 | DOWN | 0.442945 | 0.521022 |
| C4 H6 O4                | NEG | -0.08593 | DOWN | 0.932421 | 0.684293 |
| C4 H7 N3 O              | POS | 0.49524  | UP   | 0.624687 | 0.593704 |
| C4 H8 + 9.6981945       | POS | -1.48183 | DOWN | 0.139772 | 0.299504 |
| C4 H8 N4 O2             | POS | 1.270993 | UP   | 0.206509 | 0.35948  |
| C4 H8 N4 O2             | NEG | -1.22472 | DOWN | 0.223755 | 0.36845  |
| C4 H8 N6 O              | POS | 0.429744 | UP   | 0.67127  | 0.611003 |
| C4 H8 O                 | POS | 0.063102 | UP   | 0.950349 | 0.687661 |
| C4 H8 O S               | POS | 0.719371 | UP   | 0.476788 | 0.535548 |
| C4 H8 O2                | POS | 0.415197 | UP   | 0.681794 | 0.614454 |
| C4 H9 N                 | POS | 0.485649 | UP   | 0.631424 | 0.595993 |
| C4 H9 N + 0.7567741     | POS | 0.45482  | UP   | 0.653278 | 0.601899 |
| C4 H9 N3 O2             | POS | -0.67047 | DOWN | 0.507384 | 0.541451 |
| C40 H42 N10 O S         | POS | -1.11439 | DOWN | 0.268848 | 0.403667 |
| C40 H56 N6 O3 S2        | POS | 0.655412 | UP   | 0.517005 | 0.542819 |
| C40 H56 N6 O4 S2        | POS | -0.25281 | DOWN | 0.802947 | 0.656879 |
| C41 H46 N6 S            | POS | -0.1884  | DOWN | 0.852491 | 0.6639   |
| C42 H39 N9 O            | POS | -1.53614 | DOWN | 0.125546 | 0.281368 |
| C42 H45 N O5            | POS | -1.13983 | DOWN | 0.257949 | 0.406024 |
| C43 H39 N3 S            | POS | -0.80109 | DOWN | 0.427932 | 0.506097 |
| C44 H49 Cl N2 O4        | POS | -0.47215 | DOWN | 0.640959 | 0.596788 |
| C44 H49 N O6            | POS | -1.35541 | DOWN | 0.177507 | 0.341042 |
| C5 H10 O S              | NEG | -0.71607 | DOWN | 0.478821 | 0.530146 |
| C5 H10 O3 - 1.3391999   | NEG | 0.868675 | UP   | 0.389763 | 0.490062 |
| C5 H12 N2 S             | POS | -2.23143 | DOWN | 0.024291 | 0.091546 |
| C5 H12 N4 S             | POS | -3.87184 | DOWN | 3.85E-05 | 0        |
| C5 H12 N6               | POS | -0.65503 | DOWN | 0.517248 | 0.544039 |
| C5 H12 N6 O S           | NEG | 1.621906 | UP   | 0.105356 | 0.255764 |
| C5 H12 O3 S - 3.6071332 | NEG | -0.60026 | DOWN | 0.553005 | 0.564907 |
| C5 H16 N6 O S           | POS | -1.81098 | DOWN | 0.069739 | 0.198112 |
| C5 H16 N6 O2            | POS | -1.83901 | DOWN | 0.065395 | 0.19377  |
| C5 H4 N4 O              | POS | -1.35064 | DOWN | 0.179062 | 0.340954 |
| C5 H5 N5                | POS | 0.118846 | UP   | 0.906637 | 0.678754 |
| C5 H6 N2                | POS | -0.67654 | DOWN | 0.503534 | 0.543758 |

|                            |     |          |      |          |          |
|----------------------------|-----|----------|------|----------|----------|
| C5 H6 N2                   | NEG | -0.13027 | DOWN | 0.897712 | 0.675801 |
| C5 H6 O3                   | POS | -4.06627 | DOWN | 1.29E-05 | 0        |
| C5 H7 N S                  | NEG | -2.65833 | DOWN | 0.006717 | 0.045485 |
| C5 H7 N5 O2                | POS | 0.895324 | UP   | 0.375285 | 0.48679  |
| C5 H8 N6                   | POS | -0.87473 | DOWN | 0.386447 | 0.48427  |
| C5 H9 N O                  | POS | -1.40667 | DOWN | 0.161403 | 0.322558 |
| C5 H9 N3                   | POS | 1.775671 | UP   | 0.075534 | 0.202603 |
| C5 H9 N5 O3                | NEG | -0.04532 | DOWN | 0.964332 | 0.691424 |
| C6 H10 N6                  | POS | -0.99957 | DOWN | 0.32182  | 0.449362 |
| C6 H10 O3                  | NEG | -2.06951 | DOWN | 0.037324 | 0.130727 |
| C6 H11 N O2 + 3.938733     | POS | -1.36418 | DOWN | 0.174674 | 0.33575  |
| C6 H12 N2 O3               | POS | -0.38952 | DOWN | 0.700516 | 0.621774 |
| C6 H12 O3                  | POS | 0.968771 | UP   | 0.337088 | 0.45867  |
| C6 H13 N O2 S              | POS | 3.056624 | UP   | 0.00162  | 0.01186  |
| C6 H13 N O3 S              | POS | 1.22051  | UP   | 0.225374 | 0.373699 |
| C6 H14 N2 O2               | POS | -0.63019 | DOWN | 0.533321 | 0.553484 |
| C6 H14 N2 O4               | POS | 0.962808 | UP   | 0.340095 | 0.459473 |
| C6 H14 N4 S                | NEG | 1.49957  | UP   | 0.134999 | 0.287185 |
| C6 H14 N8 O                | POS | -0.1531  | DOWN | 0.879902 | 0.673092 |
| C6 H14 O3                  | POS | -1.91036 | DOWN | 0.055312 | 0.169049 |
| C6 H14 O4                  | POS | 0.003044 | UP   | 0.997604 | 0.698811 |
| C6 H15 N O4                | POS | 2.122295 | UP   | 0.032554 | 0.111608 |
| C6 H15 N O5 S              | POS | -1.17299 | DOWN | 0.244197 | 0.395791 |
| C6 H15 N5 S                | POS | 6.280545 | UP   | 6.04E-16 | 0        |
| C6 H16 Cl N5 O2            | POS | -2.38501 | DOWN | 0.015706 | 0.068225 |
| C6 H16 N2 O S2 + 4.5088425 | POS | 1.309915 | UP   | 0.192747 | 0.340423 |
| C6 H16 N2 O8               | POS | 0.838633 | UP   | 0.406473 | 0.496885 |
| C6 H16 N8 O2 + 0.9335556   | POS | 1.480006 | UP   | 0.140271 | 0.296227 |
| C6 H16 O2 S2               | POS | -0.24005 | DOWN | 0.812704 | 0.652893 |
| C6 H19 N5 O S2             | POS | -0.56888 | DOWN | 0.574008 | 0.572938 |
| C6 H4                      | POS | -2.09878 | DOWN | 0.034612 | 0.128555 |
| C6 H6                      | POS | -1.29838 | DOWN | 0.196757 | 0.350667 |
| C6 H6 N2 O3                | NEG | -0.97406 | DOWN | 0.334435 | 0.454798 |
| C6 H6 N4 O2                | NEG | 2.063627 | UP   | 0.037889 | 0.13589  |
| C6 H6 O                    | NEG | 1.034881 | UP   | 0.304869 | 0.433591 |
| C6 H6 O3                   | POS | 0.828141 | UP   | 0.412407 | 0.499135 |
| C6 H7 N3 O2                | POS | -2.68138 | DOWN | 0.006224 | 0.042502 |
| C6 H7 N3 O3                | NEG | -0.35529 | DOWN | 0.725751 | 0.626209 |
| C6 H8 O2                   | POS | -1.53321 | DOWN | 0.126286 | 0.279301 |
| C6 H9 N O4                 | POS | -0.72836 | DOWN | 0.471273 | 0.524092 |
| C6 H9 N3 O4                | NEG | -1.52885 | DOWN | 0.12739  | 0.282278 |
| C7 H10 N2 O S              | POS | -2.1609  | DOWN | 0.029398 | 0.119295 |
| C7 H10 N2 O4               | POS | 0.054924 | UP   | 0.956777 | 0.691092 |

|                          |     |          |      |          |          |
|--------------------------|-----|----------|------|----------|----------|
| C7 H10 O2 S              | NEG | 2.964942 | UP   | 0.002294 | 0.016657 |
| C7 H11 N O2              | POS | 0.867586 | UP   | 0.390361 | 0.487322 |
| C7 H12 O4 - 3.0801935    | NEG | -0.14064 | DOWN | 0.889618 | 0.673018 |
| C7 H13 N O2              | POS | -1.29804 | DOWN | 0.196875 | 0.348116 |
| C7 H13 N11 O2            | POS | -1.39176 | DOWN | 0.165974 | 0.331407 |
| C7 H13 N5                | POS | 0.228042 | UP   | 0.821919 | 0.657234 |
| C7 H14 N2 S + 4.1905837  | POS | 0.401859 | UP   | 0.691496 | 0.618013 |
| C7 H14 N4 O2 S           | NEG | -3.16418 | DOWN | 0.001058 | 0.006772 |
| C7 H14 N4 O3             | POS | 0.018303 | UP   | 0.98559  | 0.695981 |
| C7 H14 N6                | POS | 1.2738   | UP   | 0.205494 | 0.356357 |
| C7 H15 N O2              | POS | 4.113665 | UP   | 9.78E-06 | 0        |
| C7 H15 N3 O3             | POS | -1.33931 | DOWN | 0.182799 | 0.34332  |
| C7 H16 N2 O S            | POS | -0.53059 | DOWN | 0.600127 | 0.584163 |
| C7 H16 N4 O3             | POS | -0.65167 | DOWN | 0.519412 | 0.550358 |
| C7 H16 N8 O2             | NEG | 0.70396  | UP   | 0.486323 | 0.533291 |
| C7 H16 O6                | POS | 1.62509  | UP   | 0.104657 | 0.247936 |
| C7 H18 N2 O3 S           | POS | 0.826476 | UP   | 0.413352 | 0.496582 |
| C7 H18 N2 O3 S           | NEG | 1.648338 | UP   | 0.099667 | 0.236447 |
| C7 H18 N6 O6             | POS | -1.74396 | DOWN | 0.081059 | 0.218081 |
| C7 H19 Cl N4 O2          | POS | -1.15352 | DOWN | 0.252208 | 0.389982 |
| C7 H21 Cl N6 O           | POS | 0.991639 | UP   | 0.325711 | 0.450203 |
| C7 H4 N4                 | POS | -0.71309 | DOWN | 0.480659 | 0.531174 |
| C7 H4 O                  | POS | -1.13533 | DOWN | 0.259853 | 0.404202 |
| C7 H6 N2 O               | NEG | -0.8307  | DOWN | 0.410955 | 0.499085 |
| C7 H6 O                  | POS | -1.3849  | DOWN | 0.168108 | 0.322064 |
| C7 H6 O2                 | NEG | 1.019854 | UP   | 0.312012 | 0.438164 |
| C7 H7 N3                 | POS | 3.319948 | UP   | 0.000553 | 0.007706 |
| C7 H7 N5 O2              | POS | -0.18617 | DOWN | 0.854221 | 0.664529 |
| C7 H8 N2 O2              | POS | 0.932195 | UP   | 0.355795 | 0.468027 |
| C7 H8 N4 O3 - 2.622133   | NEG | -1.51728 | DOWN | 0.130356 | 0.294149 |
| C7 H9 N O2               | POS | -0.72748 | DOWN | 0.471812 | 0.529733 |
| C7 H9 N O2               | NEG | 0.354922 | UP   | 0.726022 | 0.626436 |
| C8 H10                   | POS | 0.05781  | UP   | 0.954508 | 0.689106 |
| C8 H10 N2 O3             | POS | 1.628876 | UP   | 0.103832 | 0.243952 |
| C8 H10 N2 O3 - 3.5058272 | NEG | -1.88693 | DOWN | 0.058474 | 0.177761 |
| C8 H10 N8 O2             | NEG | -1.00137 | DOWN | 0.320945 | 0.450912 |
| C8 H12 N2 O4             | POS | 1.694949 | UP   | 0.090221 | 0.225911 |
| C8 H12 N8 O              | NEG | -2.67715 | DOWN | 0.006312 | 0.035514 |
| C8 H12 N8 O2             | NEG | -1.98769 | DOWN | 0.045849 | 0.15469  |
| C8 H13 Cl                | NEG | -1.80754 | DOWN | 0.070287 | 0.197425 |
| C8 H13 N3 O5             | NEG | 0.741487 | UP   | 0.46328  | 0.51909  |
| C8 H14 N8 O2             | POS | 0.467518 | UP   | 0.64424  | 0.595765 |
| C8 H14 O3 - 6.071393     | NEG | -2.17143 | DOWN | 0.028582 | 0.114561 |

|                             |     |          |      |          |          |
|-----------------------------|-----|----------|------|----------|----------|
| C8 H14 O4                   | POS | -0.98471 | DOWN | 0.329132 | 0.451874 |
| C8 H15 N3 O3 + 3.8022223    | POS | -1.08501 | DOWN | 0.281811 | 0.421366 |
| C8 H15 N3 O3 + 4.178133     | POS | 0.785668 | UP   | 0.436928 | 0.509499 |
| C8 H16 N2 O3                | POS | 3.78898  | UP   | 5.98E-05 | 0        |
| C8 H16 N6 O                 | POS | 0.498918 | UP   | 0.622112 | 0.590884 |
| C8 H16 O3 - 5.7483726       | NEG | 2.804055 | UP   | 0.004099 | 0.034555 |
| C8 H16 O3 S                 | NEG | -1.23284 | DOWN | 0.220658 | 0.370481 |
| C8 H16 O8                   | NEG | -0.58812 | DOWN | 0.561085 | 0.565828 |
| C8 H17 Cl N2                | POS | -1.21627 | DOWN | 0.227011 | 0.377841 |
| C8 H17 N O2 S               | POS | 0.333032 | UP   | 0.742316 | 0.634713 |
| C8 H17 N7 O2 S              | NEG | -0.52708 | DOWN | 0.602547 | 0.58259  |
| C8 H17 N7 S                 | POS | -1.07112 | DOWN | 0.28808  | 0.420188 |
| C8 H20 Cl2 N2 O2            | POS | 0.257808 | UP   | 0.79913  | 0.649415 |
| C8 H20 N2 O3 S              | POS | -0.0802  | DOWN | 0.936924 | 0.685263 |
| C8 H20 N2 O4 - 3.5148826    | NEG | 1.464623 | UP   | 0.144522 | 0.30545  |
| C8 H21 N5 O5                | POS | -0.05117 | DOWN | 0.959729 | 0.691092 |
| C8 H22 N8 O S               | POS | 3.398957 | UP   | 0.000391 | 0.003989 |
| C8 H22 N8 O2 S              | POS | 0.361302 | UP   | 0.721295 | 0.629492 |
| C8 H25 N7 O5 S              | POS | 1.512739 | UP   | 0.131536 | 0.292041 |
| C8 H8 N2 O3                 | NEG | -1.88692 | DOWN | 0.058475 | 0.174792 |
| C8 H8 O2                    | NEG | -0.42478 | DOWN | 0.674853 | 0.60817  |
| C8 H9 N O2                  | POS | 0.422975 | UP   | 0.67616  | 0.61345  |
| C9 H10 N4                   | POS | -1.62675 | DOWN | 0.104294 | 0.252376 |
| C9 H10 O3                   | POS | -1.87247 | DOWN | 0.060498 | 0.182277 |
| C9 H12 N10 O                | NEG | 0.867952 | UP   | 0.39016  | 0.491157 |
| C9 H12 N4 + 5.0588694       | POS | 0.387299 | UP   | 0.702143 | 0.618115 |
| C9 H12 N8                   | POS | -1.69305 | DOWN | 0.090592 | 0.24002  |
| C9 H12 O                    | POS | 0.238415 | UP   | 0.81396  | 0.653842 |
| C9 H12 O3                   | POS | -2.29339 | DOWN | 0.020442 | 0.092149 |
| C9 H13 Cl N2                | POS | 0.720328 | UP   | 0.476199 | 0.525287 |
| C9 H13 N9 O                 | POS | 0.439782 | UP   | 0.664045 | 0.604569 |
| C9 H14 O2                   | POS | 1.135266 | UP   | 0.259881 | 0.40105  |
| C9 H15 Cl N4 O2 + 3.7597144 | POS | 0.090283 | UP   | 0.929009 | 0.68334  |
| C9 H15 N O5                 | POS | 0.193362 | UP   | 0.848654 | 0.664293 |
| C9 H15 N11                  | POS | 0.110563 | UP   | 0.913118 | 0.680139 |
| C9 H15 N7 O4                | NEG | 4.995015 | UP   | 1.57E-08 | 0        |
| C9 H15 N7 O5                | NEG | 0.513594 | UP   | 0.611881 | 0.584926 |
| C9 H16 N10                  | POS | -0.17383 | DOWN | 0.86379  | 0.6681   |
| C9 H16 N6 O2                | POS | 0.280292 | UP   | 0.782025 | 0.646535 |
| C9 H17 Cl N4 O2             | POS | 0.381286 | UP   | 0.706557 | 0.583076 |
| C9 H17 N O4                 | POS | -0.84292 | DOWN | 0.404061 | 0.494605 |
| C9 H17 N7 O                 | POS | 1.07014  | UP   | 0.288527 | 0.422319 |
| C9 H18 N2 O3                | POS | 2.057618 | UP   | 0.038474 | 0.13589  |

|                                               |      |          |      |          |          |
|-----------------------------------------------|------|----------|------|----------|----------|
| C9 H18 N2 O6                                  | POS  | 0.244855 | UP   | 0.809028 | 0.655063 |
| C9 H18 N4 O3                                  | POS  | 0.310246 | UP   | 0.759397 | 0.638852 |
| C9 H18 N4 S + 0.62561905                      | POS  | -2.61961 | DOWN | 0.007621 | 0.051828 |
| C9 H19 Cl2 N3                                 | POS  | -0.7083  | DOWN | 0.483629 | 0.52965  |
| C9 H19 N O4                                   | POS  | -1.22237 | DOWN | 0.22466  | 0.374201 |
| C9 H19 N O4 S                                 | NEG  | 1.545759 | UP   | 0.123147 | 0.281824 |
| C9 H19 N3 O5                                  | NEG  | 1.087023 | UP   | 0.28091  | 0.419003 |
| C9 H20 N2 O2 S                                | POS  | -3.65125 | DOWN | 0.00012  | 0        |
| C9 H20 N4 O4                                  | POS  | 3.402232 | UP   | 0.000386 | 0.002828 |
| C9 H20 O3 S                                   | POS  | 1.421324 | UP   | 0.157005 | 0.308138 |
| C9 H22 N2 O4 S                                | POS  | 0.466547 | UP   | 0.644929 | 0.595841 |
| C9 H23 N11 S2                                 | POS  | 2.913406 | UP   | 0.002774 | 0.019131 |
| C9 H23 N3 O2 S2                               | NEG  | -2.62397 | DOWN | 0.007514 | 0.044227 |
| C9 H23 N3 O5 S                                | POS  | -0.72407 | DOWN | 0.473899 | 0.529443 |
| C9 H25 N11 S2                                 | NEG  | 1.048732 | UP   | 0.29838  | 0.429058 |
| C9 H26 Cl2 N8 O                               | NEG  | -0.08702 | DOWN | 0.931567 | 0.686112 |
| C9 H6 N6                                      | NEG  | 0.107225 | UP   | 0.915731 | 0.6804   |
| C9 H8 O2                                      | POS  | -0.05934 | DOWN | 0.953305 | 0.689487 |
| C9 H8 O3                                      | POS  | 0.636088 | UP   | 0.529483 | 0.54655  |
|                                               | QQQ- |          |      |          |          |
| Caffeine                                      | DH   | 0.419057 | UP   | 0.678996 | 0.61244  |
| Carnitine                                     | POS  | 2.117473 | UP   | 0.032968 | 0.119756 |
| Carvone                                       | POS  | -0.9199  | DOWN | 0.362222 | 0.473771 |
| Cinnamic acid                                 | POS  | 0.19266  | UP   | 0.849197 | 0.664372 |
|                                               | QQQ- |          |      |          |          |
| Cinnamic acid                                 | DH   | -2.48686 | DOWN | 0.011574 | 0.066108 |
| Citramalic acid                               | NEG  | 1.864675 | UP   | 0.061611 | 0.184218 |
|                                               | QQQ- |          |      |          |          |
| Citrulline                                    | RP   | -1.47053 | DOWN | 0.142879 | 0.296124 |
| Cortisol                                      | POS  | -1.20928 | DOWN | 0.229728 | 0.373783 |
|                                               | QQQ- |          |      |          |          |
| Coumarin                                      | RP   | -5.14027 | DOWN | 4.09E-09 | 0        |
| Creatine                                      | NEG  | 3.761566 | UP   | 6.89E-05 | 0        |
|                                               | QQQ- |          |      |          |          |
| Cytidine monophosphate (CMP)                  | DH   | 1.846725 | UP   | 0.064238 | 0.184042 |
|                                               | QQQ- |          |      |          |          |
| Dimethylglycine                               | RP   | -1.48544 | DOWN | 0.13879  | 0.29352  |
| DL-3-Phenyllactic acid - 3.2354286            | NEG  | 4.893727 | UP   | 3.78E-08 | 0        |
| DL-Indole-3-lactic acid (3-Indolelactic acid) | POS  | -1.12468 | DOWN | 0.264403 | 0.406477 |
| D-Ribonolactone                               | NEG  | 3.03561  | UP   | 0.001756 | 0.013293 |
| Epinephrine (adrenaline)                      | POS  | -0.35046 | DOWN | 0.729335 | 0.6307   |
| Glutamic Acid                                 | POS  | 0.874452 | UP   | 0.386597 | 0.488803 |
| Glutamine or lysine or glutamic acid          | QQQ- | -1.11145 | DOWN | 0.270124 | 0.410876 |

|                            |      |          |      |          |          |
|----------------------------|------|----------|------|----------|----------|
|                            | RP   |          |      |          |          |
|                            | QQQ- |          |      |          |          |
| glyceraldehyde-3-phosphate | DH   | -3.69238 | DOWN | 9.80E-05 | 0.00158  |
| Glycerophosphocholine      | POS  | 1.379105 | UP   | 0.169925 | 0.322657 |
| Guanine                    | POS  | 3.420655 | UP   | 0.000355 | 0.006772 |
|                            | QQQ- |          |      |          |          |
| Guanine                    | RP   | 5.028301 | UP   | 1.16E-08 | 0        |
| Hippuric acid              | NEG  | 1.878469 | UP   | 0.059651 | 0.177209 |
|                            | QQQ- |          |      |          |          |
| Histamine                  | RP   | -3.65966 | DOWN | 0.000115 | 0.00158  |
| Histidine                  | NEG  | 2.989602 | UP   | 0.002092 | 0.018537 |
|                            | QQQ- |          |      |          |          |
| Histidine                  | RP   | 2.957812 | UP   | 0.002356 | 0.014618 |
|                            | QQQ- |          |      |          |          |
| Homocysteine               | RP   | -2.72936 | DOWN | 0.0053   | 0.031308 |
|                            | QQQ- |          |      |          |          |
| Homoserine                 | DH   | 1.973149 | UP   | 0.047519 | 0.160603 |
| Hypoxanthine               | POS  | 0.713697 | UP   | 0.480287 | 0.538303 |
| Hypoxanthine               | NEG  | 3.547924 | UP   | 0.000198 | 0        |
|                            | QQQ- |          |      |          |          |
| Hypoxanthine               | RP   | 2.513751 | UP   | 0.010655 | 0.046715 |
| Isobutyryl carnitine       | POS  | 2.740017 | UP   | 0.005111 | 0.028289 |
|                            | QQQ- |          |      |          |          |
| Kynurenic acid             | RP   | 0.78979  | UP   | 0.434513 | 0.508702 |
| Kynurenine                 | POS  | 5.870501 | UP   | 7.03E-13 | 0        |
| Kynurenine                 | NEG  | 4.887923 | UP   | 3.97E-08 | 0        |
|                            | QQQ- |          |      |          |          |
| Kynurenine                 | RP   | 5.813717 | UP   | 1.60E-12 | 0        |
|                            | QQQ- |          |      |          |          |
| Lauric acid                | RP   | -3.3951  | DOWN | 0.000398 | 0.00158  |
|                            | QQQ- |          |      |          |          |
| Leucine                    | RP   | 1.932761 | UP   | 0.052421 | 0.150437 |
| Liver Unknown 100          | POS  | -0.08378 | DOWN | 0.934109 | 0.685171 |
| Liver Unknown 100          | NEG  | 1.244123 | UP   | 0.216406 | 0.371367 |
| Liver Unknown 1005         | POS  | 1.178661 | UP   | 0.241894 | 0.39088  |
| Liver Unknown 1034         | POS  | -0.39487 | DOWN | 0.696602 | 0.622669 |
| Liver Unknown 1093         | POS  | -0.33332 | DOWN | 0.742104 | 0.633062 |
| Liver Unknown 1128         | POS  | -0.57431 | DOWN | 0.57035  | 0.565126 |
| Liver Unknown 1130         | POS  | -1.52437 | DOWN | 0.128534 | 0.284305 |
| Liver Unknown 1141         | POS  | -0.53954 | DOWN | 0.593975 | 0.580556 |
| Liver Unknown 1143         | POS  | -0.83091 | DOWN | 0.410833 | 0.495875 |
| Liver Unknown 1155         | POS  | 1.542422 | UP   | 0.123976 | 0.280109 |
| Liver Unknown 1192         | POS  | -2.17063 | DOWN | 0.028644 | 0.110855 |
| Liver Unknown 121          | NEG  | 0.68577  | UP   | 0.497705 | 0.531828 |
| Liver Unknown 122          | POS  | 0.295309 | UP   | 0.770658 | 0.64144  |

|                                |     |          |      |          |          |
|--------------------------------|-----|----------|------|----------|----------|
| Liver Unknown 122              | NEG | 6.146594 | UP   | 7.79E-15 | 0        |
| Liver Unknown 1237             | POS | -0.50877 | DOWN | 0.615233 | 0.590923 |
| Liver Unknown 1239             | POS | 1.860885 | UP   | 0.062158 | 0.189139 |
| Liver Unknown 126              | POS | -0.50932 | DOWN | 0.614853 | 0.587946 |
| Liver Unknown 1260             | POS | -0.97299 | DOWN | 0.334971 | 0.459411 |
| Liver Unknown 131 + 5.727112   | POS | 0.320823 | UP   | 0.751454 | 0.635394 |
| Liver Unknown 133              | POS | 0.604941 | UP   | 0.549905 | 0.559157 |
| Liver Unknown 136              | POS | -2.15477 | DOWN | 0.029881 | 0.106746 |
| Liver Unknown 137              | POS | 1.940604 | UP   | 0.051439 | 0.16225  |
| Liver Unknown 138              | NEG | 0.627942 | UP   | 0.534788 | 0.558976 |
| Liver Unknown 1416             | POS | -0.10916 | DOWN | 0.914217 | 0.680756 |
| Liver Unknown 143              | POS | -2.70475 | DOWN | 0.005757 | 0.038413 |
| Liver Unknown 143              | NEG | -0.57008 | DOWN | 0.573197 | 0.575173 |
| Liver Unknown 149              | POS | -0.23875 | DOWN | 0.813704 | 0.654037 |
| Liver Unknown 15               | POS | 0.346985 | UP   | 0.731917 | 0.627697 |
| Liver Unknown 1504             | POS | -3.1782  | DOWN | 0.001    | 0.007706 |
| Liver Unknown 1537             | POS | 0.283115 | UP   | 0.779885 | 0.644931 |
| Liver Unknown 1655             | POS | -0.92379 | DOWN | 0.360183 | 0.470659 |
| Liver Unknown 1658             | POS | 1.97923  | UP   | 0.046815 | 0.148163 |
| Liver Unknown 1674             | NEG | -3.94682 | DOWN | 2.56E-05 | 0.00158  |
| Liver Unknown 1676             | POS | -0.80951 | DOWN | 0.423064 | 0.500372 |
| Liver Unknown 1696             | POS | 1.379599 | UP   | 0.169769 | 0.324718 |
| Liver Unknown 176              | POS | 0.028718 | UP   | 0.977392 | 0.694621 |
| Liver Unknown 1762             | POS | -2.85315 | DOWN | 0.003448 | 0.02669  |
| Liver Unknown 1769             | POS | 1.679526 | UP   | 0.093266 | 0.23326  |
| Liver Unknown 1771             | POS | -1.44152 | DOWN | 0.151086 | 0.314881 |
| Liver Unknown 1788             | POS | -0.7056  | DOWN | 0.485304 | 0.531706 |
| Liver Unknown 1796 + 3.5135784 | POS | -0.54873 | DOWN | 0.587687 | 0.576594 |
| Liver Unknown 1803             | POS | 2.156824 | UP   | 0.029718 | 0.113095 |
| Liver Unknown 1812             | POS | -1.21635 | DOWN | 0.22698  | 0.371286 |
| Liver Unknown 1815             | POS | 0.891143 | UP   | 0.377535 | 0.477113 |
| Liver Unknown 1829             | POS | 3.340119 | UP   | 0.000507 | 0.00158  |
| Liver Unknown 1832             | POS | 2.755829 | UP   | 0.004843 | 0.033197 |
| Liver Unknown 1835             | POS | -0.70699 | DOWN | 0.484441 | 0.534981 |
| Liver Unknown 1838             | POS | 1.595477 | UP   | 0.111291 | 0.263108 |
| Liver Unknown 184              | POS | 0.656992 | UP   | 0.515992 | 0.547997 |
| Liver Unknown 1840             | POS | -0.08211 | DOWN | 0.935424 | 0.684038 |
| Liver Unknown 1841             | POS | 0.833573 | UP   | 0.409329 | 0.49435  |
| Liver Unknown 1844             | POS | -0.72718 | DOWN | 0.471994 | 0.522543 |
| Liver Unknown 1845             | POS | -0.99789 | DOWN | 0.322642 | 0.443573 |
| Liver Unknown 1852             | POS | -1.16934 | DOWN | 0.245682 | 0.388091 |
| Liver Unknown 1853             | POS | 1.347341 | UP   | 0.180144 | 0.3341   |
| Liver Unknown 1857             | POS | -0.99368 | DOWN | 0.324708 | 0.452705 |



|                                |     |          |      |          |          |
|--------------------------------|-----|----------|------|----------|----------|
| Liver Unknown 1866             | POS | -0.20396 | DOWN | 0.840464 | 0.66245  |
| Liver Unknown 1868             | POS | 1.419241 | UP   | 0.157625 | 0.314156 |
| Liver Unknown 1869             | POS | 1.03217  | UP   | 0.30615  | 0.441089 |
| Liver Unknown 187              | POS | -0.61772 | DOWN | 0.541483 | 0.555238 |
| Liver Unknown 1880             | NEG | -0.39612 | DOWN | 0.695689 | 0.620238 |
| Liver Unknown 1881             | NEG | -0.42557 | DOWN | 0.674282 | 0.60991  |
| Liver Unknown 1884             | POS | -1.48915 | DOWN | 0.137789 | 0.295917 |
| Liver Unknown 190              | POS | -1.52334 | DOWN | 0.128796 | 0.285641 |
| Liver Unknown 1907 - 2.3064    | NEG | 3.799703 | UP   | 5.65E-05 | 0.00158  |
| Liver Unknown 1926             | NEG | 0.633372 | UP   | 0.531249 | 0.550076 |
| Liver Unknown 1930             | NEG | 0.521888 | UP   | 0.606132 | 0.581779 |
| Liver Unknown 1931             | NEG | 2.325809 | UP   | 0.018644 | 0.081758 |
| Liver Unknown 1937             | NEG | -0.48597 | DOWN | 0.631198 | 0.596031 |
| Liver Unknown 195              | POS | 0.283626 | UP   | 0.779497 | 0.645982 |
| Liver Unknown 195              | NEG | -0.92831 | DOWN | 0.357818 | 0.467732 |
| Liver Unknown 1959             | NEG | 3.793098 | UP   | 5.85E-05 | 0.00158  |
| Liver Unknown 1996             | NEG | -1.33728 | DOWN | 0.183473 | 0.338194 |
| Liver Unknown 2007             | NEG | 1.193381 | UP   | 0.235991 | 0.377513 |
| Liver Unknown 2020             | POS | -1.53543 | DOWN | 0.125726 | 0.282957 |
| Liver Unknown 2027             | NEG | -1.11414 | DOWN | 0.268957 | 0.409989 |
| Liver Unknown 2027 + 0.9195554 | POS | 0.141839 | UP   | 0.88868  | 0.673934 |
| Liver Unknown 2097             | POS | -0.65462 | DOWN | 0.517511 | 0.54655  |
| Liver Unknown 2125             | NEG | 1.021399 | UP   | 0.311273 | 0.433731 |
| Liver Unknown 2134             | NEG | -2.00369 | DOWN | 0.044067 | 0.140411 |
| Liver Unknown 2167             | NEG | -1.76368 | DOWN | 0.077587 | 0.204745 |
| Liver Unknown 2168             | NEG | 3.871734 | UP   | 3.86E-05 | 0        |
| Liver Unknown 2178             | NEG | -1.70617 | DOWN | 0.088054 | 0.225432 |
| Liver Unknown 2234             | NEG | 1.135484 | UP   | 0.259788 | 0.403131 |
| Liver Unknown 2260             | NEG | -1.12506 | DOWN | 0.26424  | 0.405039 |
| Liver Unknown 2263             | NEG | -0.43615 | DOWN | 0.666659 | 0.605403 |
| Liver Unknown 2300             | NEG | 0.64832  | UP   | 0.521568 | 0.546458 |
| Liver Unknown 2335             | NEG | 1.348747 | UP   | 0.179683 | 0.328573 |
| Liver Unknown 2367             | NEG | 0.024602 | UP   | 0.980632 | 0.695227 |
| Liver Unknown 2368             | NEG | 0.044974 | UP   | 0.964602 | 0.69138  |
| Liver Unknown 2369             | NEG | -2.4006  | DOWN | 0.015002 | 0.059229 |
| Liver Unknown 2372             | NEG | -1.53582 | DOWN | 0.125627 | 0.277323 |
| Liver Unknown 238              | POS | -2.32158 | DOWN | 0.01887  | 0.084044 |
| Liver Unknown 2386             | NEG | -0.00853 | DOWN | 0.993284 | 0.697541 |
| Liver Unknown 2398             | NEG | -1.35582 | DOWN | 0.177374 | 0.326174 |
| Liver Unknown 2403             | NEG | -0.10922 | DOWN | 0.914171 | 0.679615 |
| Liver Unknown 2414             | NEG | -0.38737 | DOWN | 0.702088 | 0.620473 |
| Liver Unknown 2426             | NEG | -0.93338 | DOWN | 0.355179 | 0.470834 |
| Liver Unknown 2429             | NEG | 1.086675 | UP   | 0.281066 | 0.412345 |

|                                |     |          |      |          |          |
|--------------------------------|-----|----------|------|----------|----------|
| Liver Unknown 2432 - 3.3879032 | NEG | -0.65051 | DOWN | 0.520155 | 0.545019 |
| Liver Unknown 2435             | NEG | 0.338129 | UP   | 0.738512 | 0.632937 |
| Liver Unknown 2456             | NEG | -0.10406 | DOWN | 0.918213 | 0.679639 |
| Liver Unknown 247              | POS | -0.22194 | DOWN | 0.826606 | 0.658891 |
| Liver Unknown 2481             | NEG | 0.498823 | UP   | 0.622179 | 0.591157 |
| Liver Unknown 2499 - 6.208662  | NEG | -0.08853 | DOWN | 0.930385 | 0.684154 |
| Liver Unknown 25               | NEG | -1.02246 | DOWN | 0.310767 | 0.441427 |
| Liver Unknown 2500             | POS | -1.69932 | DOWN | 0.089373 | 0.228762 |
| Liver Unknown 2500             | NEG | -0.11869 | DOWN | 0.906757 | 0.677526 |
| Liver Unknown 2503             | NEG | -2.03578 | DOWN | 0.040664 | 0.143266 |
| Liver Unknown 2504             | NEG | 0.110305 | UP   | 0.91332  | 0.6794   |
| Liver Unknown 2541             | POS | 0.41315  | UP   | 0.68328  | 0.615934 |
| Liver Unknown 2542             | NEG | -0.09181 | DOWN | 0.927812 | 0.680874 |
| Liver Unknown 2550             | NEG | -0.63562 | DOWN | 0.529785 | 0.549605 |
| Liver Unknown 2551             | NEG | 1.226822 | UP   | 0.222952 | 0.370803 |
| Liver Unknown 2552             | NEG | -0.60269 | DOWN | 0.551392 | 0.561582 |
| Liver Unknown 2563             | POS | -0.76597 | DOWN | 0.448572 | 0.52362  |
| Liver Unknown 2567             | NEG | 1.638119 | UP   | 0.101838 | 0.248217 |
| Liver Unknown 2568             | NEG | -3.25073 | DOWN | 0.000741 | 0.009476 |
| Liver Unknown 2569             | NEG | -1.69448 | DOWN | 0.090311 | 0.231103 |
| Liver Unknown 2573             | NEG | -1.9608  | DOWN | 0.048976 | 0.161635 |
| Liver Unknown 2578             | POS | 2.050134 | UP   | 0.039213 | 0.145205 |
| Liver Unknown 2578             | NEG | -2.08171 | DOWN | 0.036173 | 0.131681 |
| Liver Unknown 2579             | NEG | -0.0034  | DOWN | 0.997326 | 0.698663 |
| Liver Unknown 2583             | NEG | -1.30402 | DOWN | 0.194787 | 0.346846 |
| Liver Unknown 2599             | NEG | -0.9775  | DOWN | 0.332715 | 0.454924 |
| Liver Unknown 2601             | POS | 0.32134  | UP   | 0.751066 | 0.637574 |
| Liver Unknown 2607             | NEG | 1.045563 | UP   | 0.299856 | 0.434709 |
| Liver Unknown 2611             | NEG | -0.12452 | DOWN | 0.902198 | 0.676192 |
| Liver Unknown 2616             | NEG | -2.05616 | DOWN | 0.038618 | 0.071391 |
| Liver Unknown 2630             | NEG | -1.85392 | DOWN | 0.063174 | 0.176099 |
| Liver Unknown 2637             | NEG | 0.941336 | UP   | 0.351061 | 0.461495 |
| Liver Unknown 2649             | NEG | 0.995113 | UP   | 0.324004 | 0.447669 |
| Liver Unknown 2652             | NEG | -0.59502 | DOWN | 0.556491 | 0.562117 |
| Liver Unknown 2653             | NEG | -1.39566 | DOWN | 0.164769 | 0.323052 |
| Liver Unknown 2680             | NEG | -1.55672 | DOWN | 0.120453 | 0.276148 |
| Liver Unknown 2688             | POS | 3.787082 | UP   | 6.04E-05 | 0        |
| Liver Unknown 2688             | NEG | 4.994918 | UP   | 1.57E-08 | 0        |
| Liver Unknown 2693             | NEG | -1.02179 | DOWN | 0.311084 | 0.436028 |
| Liver Unknown 2699             | NEG | -0.27341 | DOWN | 0.787254 | 0.646883 |
| Liver Unknown 2706             | POS | -0.10466 | DOWN | 0.917739 | 0.680377 |
| Liver Unknown 2707             | POS | -1.36699 | DOWN | 0.173772 | 0.328573 |
| Liver Unknown 2707             | NEG | -2.3479  | DOWN | 0.017497 | 0.084366 |

|                    |     |          |      |          |          |
|--------------------|-----|----------|------|----------|----------|
| Liver Unknown 2708 | NEG | 1.509206 | UP   | 0.132458 | 0.291829 |
| Liver Unknown 2711 | NEG | 0.109398 | UP   | 0.91403  | 0.681087 |
| Liver Unknown 2713 | POS | 0.456924 | UP   | 0.651777 | 0.599378 |
| Liver Unknown 2714 | NEG | 3.249421 | UP   | 0.000746 | 0.010305 |
| Liver Unknown 2724 | NEG | -0.67578 | DOWN | 0.504014 | 0.537388 |
| Liver Unknown 2735 | NEG | 2.035287 | UP   | 0.040714 | 0.132156 |
| Liver Unknown 2739 | NEG | -0.17726 | DOWN | 0.861127 | 0.666169 |
| Liver Unknown 2750 | NEG | -1.25032 | DOWN | 0.214094 | 0.365234 |
| Liver Unknown 2751 | NEG | 1.756905 | UP   | 0.078766 | 0.216758 |
| Liver Unknown 2754 | NEG | 0.413936 | UP   | 0.682709 | 0.613519 |
| Liver Unknown 2755 | NEG | 2.766807 | UP   | 0.004664 | 0.034108 |
| Liver Unknown 2771 | NEG | 0.527213 | UP   | 0.602452 | 0.581576 |
| Liver Unknown 2779 | POS | 0.704798 | UP   | 0.485802 | 0.531379 |
| Liver Unknown 2779 | NEG | -3.67525 | DOWN | 0.000107 | 0.002828 |
| Liver Unknown 2794 | NEG | -2.91421 | DOWN | 0.002766 | 0.022402 |
| Liver Unknown 2806 | NEG | -3.12495 | DOWN | 0.001239 | 0.013969 |
| Liver Unknown 2807 | NEG | 1.429826 | UP   | 0.154493 | 0.308138 |
| Liver Unknown 29   | POS | 0.83426  | UP   | 0.408941 | 0.502724 |
| Liver Unknown 290  | POS | 1.0351   | UP   | 0.304766 | 0.438301 |
| Liver Unknown 290  | NEG | 1.171321 | UP   | 0.244875 | 0.389982 |
| Liver Unknown 294  | POS | 0.081859 | UP   | 0.935618 | 0.684154 |
| Liver Unknown 3    | POS | 0.494107 | UP   | 0.625481 | 0.593128 |
| Liver Unknown 304  | POS | 1.484877 | UP   | 0.138944 | 0.299179 |
| Liver Unknown 311  | POS | -0.68881 | DOWN | 0.495796 | 0.537002 |
| Liver Unknown 34   | POS | -0.17186 | DOWN | 0.865314 | 0.66907  |
| Liver Unknown 348  | POS | 1.579104 | UP   | 0.115094 | 0.263748 |
| Liver Unknown 349  | POS | -1.11631 | DOWN | 0.268012 | 0.408652 |
| Liver Unknown 367  | POS | -0.49223 | DOWN | 0.626798 | 0.592203 |
| Liver Unknown 399  | POS | -1.56042 | DOWN | 0.119556 | 0.270621 |
| Liver Unknown 40   | POS | -0.85193 | DOWN | 0.399026 | 0.489171 |
| Liver Unknown 400  | POS | 1.318802 | UP   | 0.189699 | 0.348621 |
| Liver Unknown 401  | POS | -1.23714 | DOWN | 0.219031 | 0.368041 |
| Liver Unknown 416  | POS | -0.29563 | DOWN | 0.770416 | 0.642036 |
| Liver Unknown 420  | POS | 0.51724  | UP   | 0.609351 | 0.586839 |
| Liver Unknown 420  | NEG | -3.5575  | DOWN | 0.000189 | 0        |
| Liver Unknown 421  | POS | 0.49734  | UP   | 0.623217 | 0.59282  |
| Liver Unknown 44   | POS | 0.87303  | UP   | 0.387374 | 0.483078 |
| Liver Unknown 46   | POS | 1.595546 | UP   | 0.111275 | 0.258161 |
| Liver Unknown 48   | POS | 1.544372 | UP   | 0.123491 | 0.276266 |
| Liver Unknown 485  | POS | -2.48827 | DOWN | 0.011524 | 0.060263 |
| Liver Unknown 486  | POS | -2.14172 | DOWN | 0.030933 | 0.115527 |
| Liver Unknown 487  | POS | -1.95785 | DOWN | 0.04933  | 0.168462 |
| Liver Unknown 49   | POS | -0.48143 | DOWN | 0.634398 | 0.594202 |

|                   |     |          |      |          |          |
|-------------------|-----|----------|------|----------|----------|
| Liver Unknown 493 | POS | -0.60483 | DOWN | 0.549978 | 0.559382 |
| Liver Unknown 494 | POS | -1.90377 | DOWN | 0.056188 | 0.16549  |
| Liver Unknown 5   | POS | 2.246877 | UP   | 0.023278 | 0.102192 |
| Liver Unknown 5   | NEG | -0.62353 | DOWN | 0.537674 | 0.55464  |
| Liver Unknown 520 | POS | 0.488569 | UP   | 0.62937  | 0.592704 |
| Liver Unknown 531 | POS | -0.52007 | DOWN | 0.607392 | 0.586004 |
| Liver Unknown 55  | POS | 0.863385 | UP   | 0.392675 | 0.492709 |
| Liver Unknown 559 | POS | -1.25273 | DOWN | 0.213201 | 0.367467 |
| Liver Unknown 560 | POS | -0.90169 | DOWN | 0.371875 | 0.474968 |
| Liver Unknown 564 | POS | -1.85945 | DOWN | 0.062367 | 0.184568 |
| Liver Unknown 566 | POS | -2.87658 | DOWN | 0.00317  | 0.022402 |
| Liver Unknown 572 | POS | 0.089635 | UP   | 0.929517 | 0.684131 |
| Liver Unknown 573 | POS | -0.68699 | DOWN | 0.496939 | 0.5347   |
| Liver Unknown 574 | POS | -1.93052 | DOWN | 0.052704 | 0.16225  |
| Liver Unknown 576 | POS | -0.24662 | DOWN | 0.807674 | 0.651685 |
| Liver Unknown 6   | POS | 1.646833 | UP   | 0.099985 | 0.253195 |
| Liver Unknown 607 | POS | -1.25194 | DOWN | 0.213495 | 0.36255  |
| Liver Unknown 63  | POS | -0.58635 | DOWN | 0.562271 | 0.568787 |
| Liver Unknown 643 | POS | -1.92751 | DOWN | 0.053088 | 0.168069 |
| Liver Unknown 651 | POS | 1.592153 | UP   | 0.112055 | 0.261044 |
| Liver Unknown 657 | POS | 1.193129 | UP   | 0.236091 | 0.387098 |
| Liver Unknown 686 | POS | -0.91394 | DOWN | 0.365365 | 0.480506 |
| Liver Unknown 690 | POS | -0.33752 | DOWN | 0.738967 | 0.63278  |
| Liver Unknown 691 | POS | 0.549683 | UP   | 0.587037 | 0.580352 |
| Liver Unknown 697 | POS | 1.105388 | UP   | 0.272776 | 0.411612 |
| Liver Unknown 7   | POS | 0.291551 | UP   | 0.773498 | 0.64346  |
| Liver Unknown 718 | POS | 0.887238 | UP   | 0.379643 | 0.481001 |
| Liver Unknown 734 | POS | -0.95064 | DOWN | 0.346284 | 0.459842 |
| Liver Unknown 735 | POS | -0.14201 | DOWN | 0.888543 | 0.673042 |
| Liver Unknown 740 | POS | 2.733087 | UP   | 0.005233 | 0.033197 |
| Liver Unknown 77  | POS | 1.305841 | UP   | 0.194156 | 0.347609 |
| Liver Unknown 795 | POS | -0.95536 | DOWN | 0.343876 | 0.457927 |
| Liver Unknown 80  | POS | -2.19176 | DOWN | 0.027062 | 0.109078 |
| Liver Unknown 837 | POS | -1.30357 | DOWN | 0.194946 | 0.34659  |
| Liver Unknown 839 | POS | 2.433729 | UP   | 0.013594 | 0.067927 |
| Liver Unknown 846 | POS | -0.82458 | DOWN | 0.414429 | 0.495419 |
| Liver Unknown 862 | POS | 1.36155  | UP   | 0.175519 | 0.324522 |
| Liver Unknown 877 | NEG | 2.005369 | UP   | 0.043883 | 0.150232 |
| Liver Unknown 883 | POS | 0.272676 | UP   | 0.787808 | 0.646622 |
| Liver Unknown 904 | POS | 0.859336 | UP   | 0.394913 | 0.48615  |
| Liver Unknown 910 | POS | 0.142093 | UP   | 0.888481 | 0.675239 |
| Liver Unknown 910 | NEG | -1.73547 | DOWN | 0.082591 | 0.227184 |
| Liver Unknown 911 | POS | -2.53773 | DOWN | 0.009888 | 0.049918 |

|                                           |     |          |      |          |          |
|-------------------------------------------|-----|----------|------|----------|----------|
| Liver Unknown 912                         | POS | 0.738977 | UP   | 0.464802 | 0.523061 |
| Liver Unknown 913                         | POS | 0.470868 | UP   | 0.641864 | 0.59893  |
| Liver Unknown 914                         | POS | -0.83917 | DOWN | 0.406169 | 0.49486  |
| Liver Unknown 916                         | POS | -2.01562 | DOWN | 0.042776 | 0.147535 |
| Liver Unknown 919                         | POS | -1.55307 | DOWN | 0.121344 | 0.270009 |
| Liver Unknown 97                          | POS | -0.72514 | DOWN | 0.473245 | 0.527063 |
| Liver Unknown 97                          | NEG | 1.309046 | UP   | 0.193047 | 0.352911 |
| Liver Unknown 975                         | POS | -1.29816 | DOWN | 0.196833 | 0.348957 |
| Liver Unknown 990                         | POS | -0.82044 | DOWN | 0.416792 | 0.498786 |
| Liver-10-hydroxy-2E-decenoic acid         | POS | -0.42075 | DOWN | 0.677771 | 0.61153  |
| Liver-11-Dehydrodexamethasone             | POS | -1.08247 | DOWN | 0.282949 | 0.42004  |
| Liver-2,4,6,8,10-dodecapentaenal          | POS | 3.058764 | UP   | 0.001606 | 0.013969 |
| Liver-2,6-Diisopropylhydroquinone         | POS | -1.26353 | DOWN | 0.209225 | 0.358186 |
| Liver-2E,4E,8Z,10E-dodecatetraenoic acid  | POS | -0.65911 | DOWN | 0.514633 | 0.547712 |
| Liver-2-hydroxy pelargonic acid           | NEG | -0.42176 | DOWN | 0.677042 | 0.612719 |
| Liver-2-Hydroxyfelbamate                  | POS | -0.72416 | DOWN | 0.473845 | 0.531092 |
| Liver-2-Propylglutaric acid               | NEG | 0.397952 | UP   | 0.694348 | 0.616686 |
| Liver-3Capryloylglycine                   | NEG | -0.83965 | DOWN | 0.405899 | 0.498836 |
| Liver-3Capryloylglycine + 5.732313        | POS | -1.52323 | DOWN | 0.128826 | 0.281368 |
| Liver-3-hydroxy-phenylglycol              | POS | -0.29336 | DOWN | 0.772128 | 0.64266  |
| Liver-6-Ketoestriol                       | NEG | -3.09695 | DOWN | 0.001384 | 0.010305 |
| Liver-8-Amino-7-oxononanoate              | POS | 1.147828 | UP   | 0.254584 | 0.39587  |
| Liver-8-Amino-7-oxononanoate              | NEG | 0.890886 | UP   | 0.377673 | 0.47773  |
| Liver-Albuterol                           | POS | 0.650879 | UP   | 0.519919 | 0.545531 |
| Liver-alpha-Phenylcyclohexylglycolic acid | POS | 0.960951 | UP   | 0.341035 | 0.457492 |
| Liver-Artemether                          | POS | -0.83898 | DOWN | 0.406279 | 0.491572 |
| Liver-Canrenoate                          | POS | -1.32613 | DOWN | 0.187211 | 0.337564 |
| Liver-cyclandelate                        | POS | 0.383229 | UP   | 0.70513  | 0.624938 |
| Liver-Cys Pro Ile                         | POS | -1.0937  | DOWN | 0.277935 | 0.412711 |
| Liver-Cys Pro Ile                         | NEG | -1.454   | DOWN | 0.147513 | 0.300797 |
| Liver-Descarboethoxyloratadine            | POS | -2.52111 | DOWN | 0.010414 | 0.051072 |
| Liver-Didesmethylloperamide               | POS | -0.87499 | DOWN | 0.386301 | 0.490636 |
| Liver-Didrovaltratum                      | POS | -1.15508 | DOWN | 0.251561 | 0.39218  |
| Liver-Dienestrol                          | POS | -0.82769 | DOWN | 0.412665 | 0.500175 |
| Liver-Gibberellin A3                      | POS | -0.75433 | DOWN | 0.455532 | 0.52124  |
| Liver-Gibberellin A3                      | NEG | -0.45704 | DOWN | 0.651695 | 0.604932 |
| Liver-Glu Ile                             | NEG | -1.99529 | DOWN | 0.044995 | 0.157887 |
| Liver-Isoleucine                          | POS | 2.147425 | UP   | 0.030469 | 0.113831 |
| Liver-Isoleucine                          | NEG | 3.685254 | UP   | 0.000102 | 0        |
| Liver-Isopentenyladenine                  | POS | 2.565278 | UP   | 0.009068 | 0.049527 |
| Liver-Isopentenyladenine - 4.017848       | NEG | 3.970051 | UP   | 2.25E-05 | 0        |

|                                       |      |          |      |          |          |
|---------------------------------------|------|----------|------|----------|----------|
| Liver-Leu Trp Arg                     | POS  | -2.71697 | DOWN | 0.005526 | 0.037463 |
| Liver-Lys Lys Met                     | POS  | -1.45755 | DOWN | 0.14651  | 0.301439 |
| Liver-m-Coumaric acid                 | POS  | 0.83079  | UP   | 0.410904 | 0.502188 |
| Liver-N2,N2-Dimethylguanosine         | POS  | 0.916445 | UP   | 0.364043 | 0.473428 |
| Liver-Oleandolide                     | POS  | -0.51066 | DOWN | 0.613917 | 0.588459 |
| Liver-Pantothenic Acid                | NEG  | 1.826601 | UP   | 0.06729  | 0.192534 |
| Liver-Pentamidine                     | POS  | 2.057432 | UP   | 0.038493 | 0.13589  |
| Liver-Phe Ile                         | POS  | 3.746323 | UP   | 7.45E-05 | 0        |
| Liver-Phe Ile                         | NEG  | 0.78633  | UP   | 0.43654  | 0.513292 |
| Liver-Pro Gln Leu                     | POS  | -1.27575 | DOWN | 0.204792 | 0.35905  |
| Liver-Probenecid                      | POS  | -3.0603  | DOWN | 0.001597 | 0.014618 |
| Liver-Purine                          | POS  | -3.4815  | DOWN | 0.000269 | 0.006772 |
| Liver-Ramiprilat                      | NEG  | 0.987808 | UP   | 0.327599 | 0.442972 |
| Liver-Ser Trp Pro                     | POS  | -2.00517 | DOWN | 0.043905 | 0.149409 |
| Liver-sodium chlorovulone II          | POS  | -1.36571 | DOWN | 0.174182 | 0.325204 |
| Liver-sodium chlorovulone II          | NEG  | -0.32559 | DOWN | 0.74788  | 0.634309 |
| Liver-Sodium tetradecyl sulfate       | POS  | -1.3135  | DOWN | 0.191513 | 0.3482   |
| Liver-thymol                          | POS  | -2.06695 | DOWN | 0.037569 | 0.130966 |
| Liver-Trp Lys Pro                     | POS  | -0.2202  | DOWN | 0.827949 | 0.65767  |
| Liver-Trp Trp Gln                     | POS  | 0.92475  | UP   | 0.35968  | 0.466548 |
| Lysine                                | POS  | 1.956209 | UP   | 0.049528 | 0.15512  |
|                                       | QQQ- |          |      |          |          |
| Methionine                            | RP   | 1.542736 | UP   | 0.123898 | 0.260263 |
|                                       | QQQ- |          |      |          |          |
| Methyl alanine                        | RP   | 0.084029 | UP   | 0.933915 | 0.685562 |
|                                       | QQQ- |          |      |          |          |
| N12-Acetylthermospermidine            | DH   | 4.032929 | UP   | 1.57E-05 | 0.00158  |
|                                       | QQQ- |          |      |          |          |
| N1-Acetylspermine                     | DH   | 3.311078 | UP   | 0.000574 | 0.003989 |
|                                       | QQQ- |          |      |          |          |
| N-Acetyl Valine                       | RP   | 0.224373 | UP   | 0.824738 | 0.65962  |
| Niacinamide                           | POS  | 1.875027 | UP   | 0.060136 | 0.182809 |
| Nonanedioic acid                      | NEG  | -0.34596 | DOWN | 0.732681 | 0.63051  |
|                                       | QQQ- |          |      |          |          |
| Norepinephrine (noradrenaline)        | RP   | -1.92273 | DOWN | 0.0537   | 0.162659 |
|                                       | QQQ- |          |      |          |          |
| Oleic acid                            | DH   | -1.86171 | DOWN | 0.062039 | 0.184742 |
|                                       | QQQ- |          |      |          |          |
| Palmitic acid                         | RP   | -4.52478 | DOWN | 6.67E-07 | 0        |
| Pantothenic acid                      | POS  | 2.396565 | UP   | 0.015181 | 0.072497 |
| Phenylalanine                         | POS  | 3.797334 | UP   | 5.73E-05 | 0.00158  |
| Phenylalanine                         | NEG  | 5.297555 | UP   | 8.47E-10 | 0        |
|                                       | QQQ- |          |      |          |          |
| Phenylalanine                         | RP   | 3.091633 | UP   | 0.001413 | 0.015996 |
| Phthalic acid Mono-2-ethylhexyl Ester | POS  | -2.63852 | DOWN | 0.007167 | 0.049918 |

|                          |            |          |      |          |          |
|--------------------------|------------|----------|------|----------|----------|
| pipecolic acid           | QQQ-<br>RP | -1.73555 | DOWN | 0.082576 | 0.217421 |
| Proline                  | QQQ-<br>RP | 0.185253 | UP   | 0.854931 | 0.680851 |
| Pyroglutamic acid        | NEG        | 0.736763 | UP   | 0.466148 | 0.527902 |
| S-Adenosylmethionine     | QQQ-<br>DH | 4.018038 | UP   | 1.71E-05 | 0        |
| Sarcosine                | QQQ-<br>DH | 0.788127 | UP   | 0.435486 | 0.512466 |
| Serine                   | QQQ-<br>RP | 1.943221 | UP   | 0.051114 | 0.150232 |
| Spermidine               | QQQ-<br>RP | 3.160728 | UP   | 0.001073 | 0.012591 |
| Spermine                 | QQQ-<br>RP | -0.62076 | DOWN | 0.539487 | 0.555284 |
| Suberic acid             | QQQ-<br>RP | -1.44099 | DOWN | 0.151239 | 0.313219 |
| Succinic acid            | NEG        | -0.19622 | DOWN | 0.846445 | 0.663243 |
| Succinicanhydride        | NEG        | -1.62642 | DOWN | 0.104367 | 0.256567 |
| Taurine                  | QQQ-<br>RP | -3.68964 | DOWN | 9.93E-05 | 0        |
| Theophylline             | NEG        | -0.7101  | DOWN | 0.482509 | 0.528278 |
| Threonine                | QQQ-<br>RP | 1.603086 | UP   | 0.109556 | 0.259871 |
| Thymine                  | QQQ-<br>RP | 2.115848 | UP   | 0.033108 | 0.129041 |
| Trans-4 Hydroxytamoxifen | POS        | -0.34735 | DOWN | 0.731643 | 0.63089  |
| Trans-4 Hydroxytamoxifen | NEG        | -1.14667 | DOWN | 0.25507  | 0.397217 |
| Tryptophan               | POS        | 2.438634 | UP   | 0.013396 | 0.064226 |
| Tryptophan               | NEG        | 4.047586 | UP   | 1.44E-05 | 0        |
| Tryptophan               | QQQ-<br>RP | 1.179704 | UP   | 0.241473 | 0.407155 |
| Tyrosine                 | POS        | 2.797767 | UP   | 0.00419  | 0.032734 |
| Tyrosine                 | NEG        | 2.559282 | UP   | 0.009241 | 0.056741 |
| Tyrosine                 | QQQ-<br>RP | -1.17228 | DOWN | 0.244484 | 0.405646 |
| Uracil                   | QQQ-<br>RP | 4.834633 | UP   | 6.19E-08 | 0        |
| Urocanic acid            | QQQ-<br>DH | -3.57535 | DOWN | 0.000174 | 0.002828 |
| Valine                   | POS        | 3.260993 | UP   | 0.00071  | 0.006772 |
| Valine                   | QQQ-<br>RP | 0.599006 | UP   | 0.553838 | 0.563228 |
| Vidarabine               | POS        | 0.139244 | UP   | 0.890703 | 0.676557 |
| Xanthine                 | QQQ-<br>RP | -1.31289 | DOWN | 0.191723 | 0.354244 |

Supplementary Table S10. Gene-specific primers used for qRT-PCR

| Gene   | Primer sequence (5'-3') |                       |
|--------|-------------------------|-----------------------|
|        | Sense                   | Anti-sense            |
| GAPDH  | GAGTCAACGGATTTGGTCGT    | TTGATTTTGGAGGGATCTCG  |
| CYP2E1 | GACAGAGACCACCAGCACAA    | GGTGATGAACCGCTGAATCT  |
| AHR    | CTTCCAAGCGGCATAGAGAC    | AGTTATCCTGGCCTCCGTTT  |
| COMT   | TCCTGGAATACAGGGAGGTG    | CGAGGTGTGCTTTGCATTTA  |
| CYP1A1 | GACAGATCCCATCTGCCCTA    | GGTTGATCTGCCACTGGTTT  |
| EPHX1  | CTGTACCCCGTCAAGGAGAA    | CCAGGGAGAACTTCCTTTCC  |
| ABCB1  | GCTCCTGACTATGCCAAAGC    | TCTTCACCTCCAGGCTCAGT  |
| PTGS2  | TGAGCATCTACGGTTTGCTG    | TGCTTGTCTGGAACAACCTGC |
| CYP1B1 | GACCCCAAGTCTCAATCTCA    | CTCCCACTCGAGTCTCTTGG  |
| GSTK1  | CCAGAGATGCTGGAGAAAGC    | GCCTCAGTGGTCTCCTTGAG  |
| CYP2D6 | AGATCGACGACCGTGATAGG    | CAGGTTGGTGATGAGTGTCG  |
| NAT1   | ATTCAAGCCAGGAAGAAGCA    | CCCCACAATGGATGTTAAGG  |
| NAT2   | GGGATCATGGACATTGAAGC    | CACCCCGGTTTCTTCTTACA  |
| GSTT1  | GGCCTTCCTTACTGGTCCTC    | TTGGCCTTCAGAATGACCTC  |



**Supplementary Table S11.** List of all molecular concepts enriched by BCa-specific metabolome

| Database                            | Molecular Concept                                                                        | P-Value  | Q-Value     |
|-------------------------------------|------------------------------------------------------------------------------------------|----------|-------------|
| InterPro                            | Nuclear protein SET                                                                      | 4.10E-19 | 1.9155E-15  |
| KEGG Pathway                        | Tryptophan metabolism                                                                    | 7.10E-19 | 1.20355E-16 |
| GO Molecular Function               | methyltransferase activity                                                               | 3.00E-18 | 6.25802E-15 |
| GO Molecular Function               | unspecific monooxygenase activity                                                        | 1.20E-16 | 1.29887E-13 |
| InterPro                            | E-class P450, group I                                                                    | 4.00E-14 | 9.43082E-11 |
| InterPro                            | Cytochrome P450                                                                          | 3.20E-13 | 4.98E-10    |
| InterPro                            | SET-related region                                                                       | 1.20E-12 | 1.39964E-09 |
| GO Molecular Function               | oxygen binding                                                                           | 3.40E-12 | 2.36E-09    |
| KEGG Pathway                        | gamma-Hexachlorocyclohexane degradation                                                  | 4.30E-12 | 3.63165E-10 |
| KEGG Pathway                        | Fatty acid metabolism                                                                    | 7.20E-11 | 4.05E-09    |
| GO Biological Process               | chromatin modification                                                                   | 1.20E-10 | 2.24195E-07 |
| KEGG Pathway                        | Methionine metabolism                                                                    | 5.60E-10 | 2.36884E-08 |
| GO Molecular Function               | histone-lysine N-methyltransferase activity                                              | 1.40E-09 | 7.3094E-07  |
| InterPro                            | Glycosyl transferase, family 29                                                          | 1.70E-09 | 1.65379E-06 |
| GO Molecular Function               | monooxygenase activity                                                                   | 7.70E-09 | 3.22692E-06 |
| GO Cellular Component               | microsome                                                                                | 8.70E-09 | 3.82139E-06 |
| Literature-defined Concepts         | Up-regulated genes in normal liver compared to other normal tissues                      | 8.00E-08 | 5.28402E-05 |
| Literature-defined Concepts         | Experimental Drug Targets                                                                | 2.00E-07 | 6.54136E-05 |
| InterPro                            | Pre-SET                                                                                  | 2.10E-07 | 1.66E-04    |
| Oncomine Clusters                   | Co-expressed across 62 Normal samples (Hsiao_Normal)                                     | 7.00E-07 | 0.007992168 |
| InterPro                            | Nuclear protein Zn <sup>2+</sup> -binding                                                | 2.20E-06 | 1.52E-03    |
| Literature-defined Concepts         | Up-regulated genes in liver compared to brain, kidney, lung, muscle, prostate, and vulva | 2.50E-06 | 5.59E-04    |
| HPRD Interaction Sets               | DNMT3A                                                                                   | 3.00E-06 | 0.01644257  |
| Oncomine Gene Expression Signatures | Normal Type - Top 5% over-expressed in Liver (Hsiao)                                     | 8.30E-06 | 0.046484876 |
| HPRD Interaction Sets               | HDAC1                                                                                    | 1.00E-05 | 0.027718545 |

|                                     |                                                                      |          |             |
|-------------------------------------|----------------------------------------------------------------------|----------|-------------|
| Biocarta Pathway                    | SARS Coronavirus Protease                                            | 1.30E-05 | 0.003464399 |
| Oncomine Gene Expression Signatures | Normal Type - Top 10% over-expressed in Liver (Hsiao)                | 1.40E-05 | 0.039665105 |
| KEGG Pathway                        | Aminoacyl-tRNA biosynthesis                                          | 1.50E-05 | 0.000516995 |
| InterPro                            | SAM (and some other nucleotide) binding motif                        | 1.60E-05 | 0.009160212 |
| GO Molecular Function               | L-lactate dehydrogenase activity                                     | 2.10E-05 | 7.18E-03    |
| GO Biological Process               | DNA methylation                                                      | 2.10E-05 | 0.019036188 |
| GO Molecular Function               | 5-nucleotidase activity                                              | 2.10E-05 | 7.18E-03    |
| GO Biological Process               | tricarboxylic acid cycle intermediate metabolism                     | 2.10E-05 | 0.019036188 |
| InterPro                            | PWWP                                                                 | 2.30E-05 | 1.22E-02    |
| InterPro                            | Pyridoxal-dependent decarboxylase                                    | 2.30E-05 | 1.22E-02    |
| InterPro                            | AWS                                                                  | 2.30E-05 | 1.22E-02    |
| InterPro                            | L-lactate/malate dehydrogenase                                       | 2.30E-05 | 1.22E-02    |
| KEGG Pathway                        | Alkaloid biosynthesis I                                              | 2.90E-05 | 8.28E-04    |
| Oncomine Gene Expression Signatures | Normal Type - Top 10% under-expressed in Vulvar (Hsiao)              | 3.60E-05 | 0.067553012 |
| Oncomine Clusters                   | Co-expressed across 36 Multi-cancer samples (Ge_Multi-cancer)        | 3.70E-05 | 0.139717635 |
| HPRD Interaction Sets               | DNMT1                                                                | 4.70E-05 | 0.085493793 |
| HPRD Interaction Sets               | DNMT3B                                                               | 4.70E-05 | 0.085493793 |
| HPRD Interaction Sets               | CBX1                                                                 | 4.70E-05 | 0.085493793 |
| KEGG Pathway                        | Tyrosine metabolism                                                  | 5.60E-05 | 1.36E-03    |
| GO Biological Process               | electron transport                                                   | 6.50E-05 | 0.030099927 |
| GO Molecular Function               | long-chain-fatty-acid-CoA ligase activity                            | 6.70E-05 | 0.01757878  |
| Oncomine Clusters                   | Co-expressed across 101 Normal samples (Su_Normal)                   | 6.80E-05 | 0.156390159 |
| InterPro                            | Lactate/malate dehydrogenase                                         | 7.60E-05 | 0.027623397 |
| Literature-defined Concepts         | Trimethylated H3K27 occupancy in embryonic fibroblasts               | 8.50E-05 | 0.014027468 |
| Oncomine Gene Expression Signatures | Normal Type - Top 10% under-expressed in Prostate (Hsiao)            | 9.60E-05 | 0.135052655 |
| Oncomine Gene Expression Signatures | Cancer Type - Top 5% under-expressed in Prostate Adenocarcinoma (Su) | 1.20E-04 | 0.134268958 |
| GO Cellular Component               | endoplasmic reticulum                                                | 1.20E-04 | 0.026741963 |
| KEGG Pathway                        | Phenylalanine, tyrosine and tryptophan biosynthesis                  | 1.40E-04 | 0.003036203 |

|                                     |                                                                                                                             |          |             |
|-------------------------------------|-----------------------------------------------------------------------------------------------------------------------------|----------|-------------|
| GO Molecular Function               | S-adenosylmethionine-dependent methyltransferase activity                                                                   | 1.70E-04 | 3.89E-02    |
| GO Biological Process               | protein biosynthesis                                                                                                        | 1.80E-04 | 0.066755622 |
| Oncomine Clusters                   | Co-expressed across 54 Sarcoma samples (Detwiller_Sarcoma)                                                                  | 2.10E-04 | 0.238874229 |
| GO Molecular Function               | DNA (cytosine-5-)-methyltransferase activity                                                                                | 2.10E-04 | 0.044390242 |
| GO Molecular Function               | creatine kinase activity                                                                                                    | 2.10E-04 | 0.044390242 |
| GO Molecular Function               | hydrolase activity, acting on ester bonds                                                                                   | 2.10E-04 | 0.044390242 |
| GO Biological Process               | nucleotide catabolism                                                                                                       | 2.10E-04 | 6.54E-02    |
| GO Molecular Function               | oxidoreductase activity, acting on paired donors, with incorporation or reduction of molecular oxygen,                      | 2.10E-04 | 0.044390242 |
| GO Molecular Function               | palmitoyl-CoA hydrolase activity                                                                                            | 2.10E-04 | 0.044390242 |
| GO Biological Process               | catecholamine biosynthesis                                                                                                  | 2.10E-04 | 6.54E-02    |
| Oncomine Clusters                   | Co-expressed across 30 Prostate samples (Luo_Prostate_2)                                                                    | 2.30E-04 | 0.219913392 |
| Oncomine Clusters                   | Co-expressed across 25 Pancreas samples (Grutzmann_Pancreas)                                                                | 2.30E-04 | 0.203341554 |
| Oncomine Clusters                   | Co-expressed across 107 Seminoma samples (Korkola_Seminoma)                                                                 | 2.30E-04 | 0.203341554 |
| InterPro                            | C-5 cytosine-specific DNA methylase                                                                                         | 2.30E-04 | 0.079127168 |
| InterPro                            | Aminoacyl-tRNA synthetase, class Ib                                                                                         | 2.30E-04 | 0.079127168 |
| InterPro                            | Generic methyltransferase                                                                                                   | 2.30E-04 | 0.079127168 |
| InterPro                            | ATP:guanido phosphotransferase                                                                                              | 2.30E-04 | 0.079127168 |
| InterPro                            | E-class P450, CYP3A                                                                                                         | 2.30E-04 | 0.079127168 |
| InterPro                            | Poly(ADP-ribose) polymerase, catalytic region                                                                               | 2.30E-04 | 0.079127168 |
| InterPro                            | Poly(ADP-ribose) polymerase, regulatory region                                                                              | 2.30E-04 | 0.079127168 |
| InterPro                            | Aromatic amino acid hydroxylase                                                                                             | 2.30E-04 | 0.079127168 |
| InterPro                            | Zn-finger-like, PHD finger                                                                                                  | 2.30E-04 | 0.079127168 |
| Connectivity Map                    | CellLine Batch - description - Top 5% over-expressed in 25, MCF7 treated with acetylsalicylic acid (.0001 M) for 6 h (Lamb) | 2.40E-04 | 0.720812442 |
| InterPro                            | Aminoacyl-tRNA synthetase, class I                                                                                          | 2.60E-04 | 5.41E-02    |
| KEGG Pathway                        | Cysteine metabolism                                                                                                         | 2.70E-04 | 5.00E-03    |
| Oncomine Clusters                   | Co-expressed across 54 Sarcoma samples (Detwiller_Sarcoma)                                                                  | 3.20E-04 | 2.03E-01    |
| Oncomine Gene Expression Signatures | Normal Type - Top 1% over-expressed in Liver (Su)                                                                           | 3.50E-04 | 3.24E-01    |

|                                     |                                                                                                                |          |             |
|-------------------------------------|----------------------------------------------------------------------------------------------------------------|----------|-------------|
| GO Biological Process               | protein amino acid glycosylation                                                                               | 3.50E-04 | 0.080328583 |
| GO Biological Process               | amino acid metabolism                                                                                          | 3.50E-04 | 0.080328583 |
| Connectivity Map                    | MCF Cells Treatment - Top 1% over-expressed in 504, MCF7 treated with 5253409 (.000017 M) for 6 h (Lamb)       | 3.50E-04 | 0.535540964 |
| Oncomine Clusters                   | Co-expressed across 123 Normal samples (Shyamsundar_Normal)                                                    | 3.80E-04 | 2.05E-01    |
| KEGG Pathway                        | Taurine and hypotaurine metabolism                                                                             | 4.90E-04 | 0.008346354 |
| KEGG Pathway                        | Urea cycle and metabolism of amino groups                                                                      | 5.10E-04 | 7.78E-03    |
| Oncomine Clusters                   | Co-expressed across 27 Lymphoma samples (Storz_Lymphoma)                                                       | 5.80E-04 | 2.90E-01    |
| HPRD Interaction Sets               | SUV39H1                                                                                                        | 6.90E-04 | 0.62888088  |
| HPRD Interaction Sets               | DNMT3L                                                                                                         | 6.90E-04 | 0.62888088  |
| Chromosome Subregion                | 10q24                                                                                                          | 7.00E-04 | 0.221969167 |
| Transfac TF Matrix - 1000bp         | LEF-1                                                                                                          | 7.20E-04 | 0.260056043 |
| Oncomine Gene Expression Signatures | Breast Ductal Carcinoma Docetaxol Response - Top 10% over-expressed in Resistant (Chang)                       | 7.40E-04 | 0.518110232 |
| KEGG Pathway                        | Selenoamino acid metabolism                                                                                    | 7.80E-04 | 0.010978006 |
| KEGG Pathway                        | Arginine and proline metabolism                                                                                | 8.10E-04 | 0.01047744  |
| Connectivity Map                    | CellLine Batch - description - Top 1% over-expressed in 24, MCF7 treated with NU-1025 (.0001 M) for 6 h (Lamb) | 8.10E-04 | 0.815410116 |
| Oncomine Clusters                   | Co-expressed across 8 Breast samples (Poola_Breast)                                                            | 8.10E-04 | 0.385349858 |
| Oncomine Gene Expression Signatures | Acute Lymphoblastic Leukemia Genetic Features - Top 5% over-expressed in BCR-ABL positive (Kirschner-Schwabe)  | 8.10E-04 | 5.08E-01    |
| Oncomine Gene Expression Signatures | Acute Myeloid Leukemia Karyotype - Top 5% under-expressed in 8 (Valk)                                          | 8.20E-04 | 0.459238728 |
| Oncomine Clusters                   | Co-expressed across 60 Liver samples (Okada_Liver)                                                             | 8.20E-04 | 0.378080678 |
| Oncomine Gene Expression Signatures | Normal Type - Top 5% over-expressed in Liver (Su)                                                              | 8.40E-04 | 0.428627835 |
| Oncomine Clusters                   | Co-expressed across 9 Ovarian samples (Benetkiewicz_Ovarian_2)                                                 | 9.10E-04 | 4.00E-01    |
| KEGG Pathway                        | Valine, leucine and isoleucine biosynthesis                                                                    | 9.20E-04 | 1.11E-02    |
| GO Molecular Function               | ligase activity                                                                                                | 0.001    | 1.42E-01    |
| Oncomine Clusters                   | Co-expressed across 20 CellLine samples (Irizarry_CellLine)                                                    | 0.001    | 4.18E-01    |

|                                     |                                                                                                                         |       |             |
|-------------------------------------|-------------------------------------------------------------------------------------------------------------------------|-------|-------------|
| Oncomine Clusters                   | Co-expressed across 60 Liver samples (Iizuka_Liver_2)                                                                   | 0.001 | 0.404281622 |
| Oncomine Clusters                   | Co-expressed across 7 CellLine samples (Carson_CellLine)                                                                | 0.001 | 4.04E-01    |
| Oncomine Gene Expression Signatures | CellLine methotrexate - Top 10% under-expressed in indeterminate, resistant (Staunton)                                  | 0.001 | 0.485507652 |
| Oncomine Gene Expression Signatures | Cancer Type - Top 10% under-expressed in Prostate Adenocarcinoma (Su)                                                   | 0.001 | 4.92E-01    |
| InterPro                            | AMP-dependent synthetase and ligase                                                                                     | 0.001 | 0.247879434 |
| GO Biological Process               | aromatic amino acid family metabolism                                                                                   | 0.001 | 0.240340733 |
| Oncomine Gene Expression Signatures | head and neck squamous cell carcinoma Differentiation - Top 10% over-expressed in Poor (Chung)                          | 0.001 | 0.491120675 |
| Oncomine Gene Expression Signatures | Acute Lymphoblastic Leukemia Genetic Features - Top 10% over-expressed in BCR-ABL positive (Kirschner-Schwabe)          | 0.001 | 4.41E-01    |
| Oncomine Gene Expression Signatures | Gastric Carcinoma Site - Top 10% over-expressed in Body (Leung)                                                         | 0.001 | 4.50E-01    |
| KEGG Pathway                        | Lysine degradation                                                                                                      | 0.002 | 0.017250199 |
| Oncomine Gene Expression Signatures | Cancer Type - Top 20% under-expressed in Pancreatic Carcinoma (Uhlen)                                                   | 0.002 | 4.56E-01    |
| Oncomine Gene Expression Signatures | Cancer Type - v1 - Top 5% under-expressed in Breast Ductal Carcinoma (Bittner)                                          | 0.002 | 0.445717947 |
| HPRD Interaction Sets               | POR                                                                                                                     | 0.002 | 1.131061392 |
| Oncomine Gene Expression Signatures | Lung Cancer Type - Top 10% over-expressed in Lung Squamous Cell Carcinoma (Wigle)                                       | 0.002 | 4.36E-01    |
| GO Biological Process               | nucleoside metabolism                                                                                                   | 0.002 | 3.02E-01    |
| Oncomine Clusters                   | Co-expressed across 79 Prostate samples (Glinsky_Prostate)                                                              | 0.002 | 5.92E-01    |
| Connectivity Map                    | CellLine Batch - description - Top 5% under-expressed in 109, SKMEL5 treated with benserazide (.00001 M) for 6 h (Lamb) | 0.002 | 1.370133949 |
| Oncomine Clusters                   | Co-expressed across 23 Ovarian samples (Gilks_Ovarian)                                                                  | 0.002 | 5.66E-01    |
| Literature-defined Concepts         | Downregulated genes in nasal polyps after glucocorticoid treatment                                                      | 0.002 | 0.243768737 |
| Oncomine Gene Expression Signatures | Normal Type - Top 1% over-expressed in Liver (Hsiao)                                                                    | 0.002 | 0.450894356 |
| GO Molecular Function               | DNA binding                                                                                                             | 0.002 | 0.25462993  |
| Oncomine Gene Expression Signatures | Multi-Tissue Type - Top 1% under-expressed in lung cancer                                                               | 0.002 | 4.69E-01    |

|                                     |                                                                                             |       |             |
|-------------------------------------|---------------------------------------------------------------------------------------------|-------|-------------|
|                                     | (Uhlen)                                                                                     |       |             |
| GO Biological Process               | aspartyl-tRNA aminoacylation                                                                | 0.002 | 0.322310681 |
| GO Molecular Function               | aspartate-tRNA ligase activity                                                              | 0.002 | 2.57E-01    |
| GO Biological Process               | neurotransmitter biosynthesis                                                               | 0.002 | 0.322310681 |
| GO Biological Process               | protein ubiquitination                                                                      | 0.002 | 0.322310681 |
| GO Molecular Function               | uridine kinase activity                                                                     | 0.002 | 2.57E-01    |
| GO Molecular Function               | beta-galactoside alpha-2,3-sialyltransferase activity                                       | 0.002 | 2.57E-01    |
| Conserved Promoter Motif            | CLUSTER_68__V\$HSF1_01                                                                      | 0.002 | 0.365226308 |
| Oncomine Gene Expression Signatures | Head and Neck Squamous Cell Carcinoma Differentiation - Top 1% over-expressed in 3 (Cromer) | 0.002 | 0.471233841 |
| KEGG Pathway                        | Phenylalanine metabolism                                                                    | 0.002 | 0.023034851 |
| Oncomine Clusters                   | Co-expressed across 85 Brain samples (Freije_Brain)                                         | 0.002 | 5.80E-01    |
| Oncomine Clusters                   | Co-expressed across 24 CellLine samples (Robinson_CellLine)                                 | 0.002 | 5.80E-01    |
| InterPro                            | FYVE/PHD zinc finger                                                                        | 0.002 | 0.426120985 |
| InterPro                            | Aminotransferases class-I pyridoxal-phosphate-binding site                                  | 0.002 | 0.426120985 |
| InterPro                            | OB-fold nucleic acid binding                                                                | 0.002 | 0.426120985 |
| InterPro                            | ValRS/IleRS editing                                                                         | 0.002 | 0.426120985 |
| InterPro                            | WGR                                                                                         | 0.002 | 0.426120985 |
| InterPro                            | E-class P450, CYP2A                                                                         | 0.002 | 0.426120985 |
| InterPro                            | Phosphoribulokinase/uridine kinase                                                          | 0.002 | 0.426120985 |
| InterPro                            | Acyl-CoA thioester hydrolase/bile acid-CoA amino acid N-acetyltransferase                   | 0.002 | 0.426120985 |
| InterPro                            | tRNA synthetase, class II (D, K and N)                                                      | 0.002 | 0.426120985 |
| InterPro                            | Uridine kinase                                                                              | 0.002 | 0.426120985 |
| InterPro                            | Aspartyl-tRNA synthetase, class IIb                                                         | 0.002 | 0.426120985 |
| InterPro                            | Zn-finger, RING                                                                             | 0.002 | 0.426120985 |
| InterPro                            | Amino acid-binding ACT                                                                      | 0.002 | 0.426120985 |
| InterPro                            | Methyltransferase, NNMT/PNMT/TEMT                                                           | 0.002 | 0.426120985 |
| Oncomine Gene Expression Signatures | Bladder Type - Top 5% over-expressed in TCC (Blaveri)                                       | 0.002 | 4.92E-01    |
| Oncomine Clusters                   | Co-expressed across 60 Bladder samples (Dyrskjot_Bladder_3)                                 | 0.002 | 5.86E-01    |

|                                     |                                                                                                                                    |       |             |
|-------------------------------------|------------------------------------------------------------------------------------------------------------------------------------|-------|-------------|
| Connectivity Map                    | CellLine Batch - description - Top 1% over-expressed in 73, SKMEL5 treated with staurosporine (.00000001 M) for 6 h (Lamb)         | 0.002 | 1.468796451 |
| Transfac TF Matrix - 1000bp         | TGIF                                                                                                                               | 0.002 | 0.439896229 |
| GO Biological Process               | protein amino acid ADP-ribosylation                                                                                                | 0.002 | 3.00E-01    |
| GO Molecular Function               | NAD+ ADP-ribosyltransferase activity                                                                                               | 0.002 | 0.254387046 |
| Connectivity Map                    | CellLine Batch - description - Top 5% over-expressed in 71, SKMEL5 treated with indometacin (.0001 M) for 6 h (Lamb)               | 0.002 | 1.26E+00    |
| Oncomine Gene Expression Signatures | Cancer Type 2 - Top 20% under-expressed in Pancreatic Carcinoma (Uhlen)                                                            | 0.003 | 5.21E-01    |
| Literature-defined Concepts         | Differentially regulated genes between NSC 685989 sensitive and resistant cell lines, following exposure to the drug               | 0.003 | 0.276395957 |
| Oncomine Gene Expression Signatures | Breast HER2 Status - Top 5% over-expressed in positive (Ma)                                                                        | 0.003 | 5.13E-01    |
| KEGG Pathway                        | Novobiocin biosynthesis                                                                                                            | 0.003 | 2.58E-02    |
| Oncomine Gene Expression Signatures | Acute Lymphoblastic Leukemia Treatment - Top 10% under-expressed in High-dose Methotrexate (Cheok)                                 | 0.003 | 5.36E-01    |
| Oncomine Gene Expression Signatures | Breast Carcinoma p53 Mutation Type - Top 5% under-expressed in Stop Codon Point Mutation (Miller)                                  | 0.003 | 5.23E-01    |
| Oncomine Clusters                   | Co-expressed across 60 Colon samples (Graudens_Colon)                                                                              | 0.003 | 0.64679695  |
| Oncomine Gene Expression Signatures | Breast Lobular Carcinoma E-cadherin - Top 10% under-expressed in 3 (Zhao)                                                          | 0.003 | 5.21E-01    |
| Oncomine Gene Expression Signatures | Leukemia Daunorubicin Sensitivity - Top 10% over-expressed in Resistant (Holleman)                                                 | 0.003 | 0.510326582 |
| Oncomine Gene Expression Signatures | Ovarian Carcinoma Histologic Subtype - Top 5% under-expressed in Mucinous (Schwartz)                                               | 0.003 | 5.06E-01    |
| GO Cellular Component               | membrane                                                                                                                           | 0.003 | 4.40E-01    |
| Literature-defined Concepts         | Differentially regulated genes between NSC 676916 sensitive and resistant cell lines, following exposure to the drug               | 0.003 | 0.289074972 |
| Oncomine Gene Expression Signatures | Ovarian Adenocarcinoma CHTN Stage - Top 10% under-expressed in 4A (Welsh)                                                          | 0.003 | 0.507441381 |
| Connectivity Map                    | CellLine Batch - description - Top 5% over-expressed in 13, MCF7 treated with nordihydroguaiaretic acid (.000001 M) for 6 h (Lamb) | 0.003 | 1.348077665 |

|                                     |                                                                                                                 |       |             |
|-------------------------------------|-----------------------------------------------------------------------------------------------------------------|-------|-------------|
| Oncomine Gene Expression Signatures | Diffuse Large B-Cell Lymphoma DLBCL Subgroup - Top 5% over-expressed in Activated B-Cell-like DLBCL (Rosenwald) | 0.003 | 5.07E-01    |
| KEGG Pathway                        | Stilbene, coumarine and lignin biosynthesis                                                                     | 0.003 | 3.00E-02    |
| Oncomine Gene Expression Signatures | Pancreas Type - Top 5% over-expressed in Pancreatic Adenocarcinoma (Iacobuzio-Donahue)                          | 0.003 | 5.00E-01    |
| GO Molecular Function               | iron ion binding                                                                                                | 0.003 | 0.319851863 |
| Oncomine Gene Expression Signatures | CellLine Cisplatin - Top 20% under-expressed in resistant (Staunton)                                            | 0.003 | 4.89E-01    |
| Oncomine Gene Expression Signatures | Multi-Tissue Type - Top 20% under-expressed in prostate cancer (Uhlen)                                          | 0.003 | 4.86E-01    |
| Connectivity Map                    | MCF Cells Treatment - Top 1% over-expressed in 504, MCF7 treated with 5230742 (.000017 M) for 6 h (Lamb)        | 0.003 | 1.250626134 |
| Literature-defined Concepts         | Up-regulated genes in fetal liver tissue compared to various other normal adult and fetal tissues               | 0.003 | 0.273062164 |
| Oncomine Clusters                   | Co-expressed across 19 Adrenal samples (Giordano_Adrenal)                                                       | 0.003 | 7.18E-01    |
| Oncomine Gene Expression Signatures | Cancer Type 2 - Top 20% under-expressed in Urothelial Cancer (Uhlen)                                            | 0.003 | 4.86E-01    |
| Oncomine Gene Expression Signatures | Ovarian Carcinoma Histology - Top 10% under-expressed in Mucinous Carcinoma (Bittner)                           | 0.003 | 0.477331905 |
| KEGG Pathway                        | Histidine metabolism                                                                                            | 0.004 | 3.13E-02    |
| Oncomine Gene Expression Signatures | Prostate Type - Top 10% over-expressed in Prostate Carcinoma (Luo)                                              | 0.004 | 4.85E-01    |
| GO Biological Process               | biosynthesis                                                                                                    | 0.004 | 0.410626982 |
| Oncomine Gene Expression Signatures | Cancer Type - v1 - Top 1% under-expressed in Breast Ductal Carcinoma (Bittner)                                  | 0.004 | 0.48677182  |
| Transfac TF Matrix - 1000bp         | ARP-1                                                                                                           | 0.004 | 4.50E-01    |
| Oncomine Gene Expression Signatures | CellLine methotrexate - Top 20% under-expressed in resistant (Staunton)                                         | 0.004 | 4.98E-01    |
| Oncomine Gene Expression Signatures | Colon Type - Top 1% over-expressed in Colorectal Carcinoma Metastasis to Liver (Graudens)                       | 0.004 | 4.87E-01    |
| Oncomine Gene Expression Signatures | Lymphoid Type - Top 1% over-expressed in Cutaneous Diffuse Large B-Cell Lymphoma (Storz)                        | 0.004 | 4.81E-01    |
| Oncomine Gene Expression Signatures | Metastatic Prostate Cancer Site - Top 10% under-expressed in                                                    | 0.004 | 0.481383508 |



|                                     |                                                                                                                              |       |             |
|-------------------------------------|------------------------------------------------------------------------------------------------------------------------------|-------|-------------|
|                                     | Bone (Dhanasekaran)                                                                                                          |       |             |
| Connectivity Map                    | CellLine Batch - description - Top 1% under-expressed in 44, HL60 treated with sodium phenylbutyrate (.001 M) for 6 h (Lamb) | 0.004 | 1.37E+00    |
| Oncomine Gene Expression Signatures | Acute Myeloid Leukemia Karyotype - Top 10% under-expressed in 8 (Valk)                                                       | 0.004 | 4.75E-01    |
| Oncomine Gene Expression Signatures | Multi-Tissue Type - Top 20% under-expressed in breast cancer (Uhlen)                                                         | 0.004 | 4.69E-01    |
| Oncomine Gene Expression Signatures | Soft Tissue Cancer Type - Top 10% under-expressed in Soft Tissue Sarcoma (Segal)                                             | 0.004 | 0.461880615 |
| Oncomine Gene Expression Signatures | Ovarian Carcinoma Histologic Subtype - Top 10% under-expressed in Mucinous (Schwartz)                                        | 0.004 | 4.53E-01    |
| Oncomine Clusters                   | Co-expressed across 7 CellLine samples (Carson_CellLine)                                                                     | 0.004 | 8.73E-01    |
| Connectivity Map                    | MCF Cells Treatment - Top 1% under-expressed in 502, MCF7 treated with trichostatin A (.000001 M) for 6 h (Lamb)             | 0.004 | 1.269887006 |
| Chromosome Subregion                | 7q21                                                                                                                         | 0.004 | 0.683671666 |
| Oncomine Gene Expression Signatures | Normal Type - Top 5% under-expressed in Lung (Hsiao)                                                                         | 0.004 | 4.58E-01    |
| Connectivity Map                    | CellLine Batch - description - Top 1% under-expressed in 2, MCF7 treated with phenyl biguanide (.00001 M) for 6 h (Lamb)     | 0.004 | 1.21E+00    |
| InterPro                            | Aminoacyl-transfer RNA synthetase, class II                                                                                  | 0.004 | 5.35E-01    |
| GO Molecular Function               | zinc ion binding                                                                                                             | 0.004 | 4.21E-01    |
| Oncomine Gene Expression Signatures | Ovarian Histology - Top 10% under-expressed in Clear Cell (Lu)                                                               | 0.004 | 4.66E-01    |
| Oncomine Gene Expression Signatures | Leukemia Remission - day 33 - Top 1% under-expressed in No (Cario)                                                           | 0.005 | 4.60E-01    |
| Oncomine Gene Expression Signatures | Bladder Type - Top 10% over-expressed in TCC (Blaveri)                                                                       | 0.005 | 4.60E-01    |
| Oncomine Clusters                   | Co-expressed across 17 Melanoma samples (Winnepenninckx_Melanoma_2)                                                          | 0.005 | 9.11E-01    |
| Oncomine Gene Expression Signatures | Breast Ductal Carcinoma Docetaxol Response - Top 5% over-expressed in Resistant (Chang)                                      | 0.005 | 4.63E-01    |
| KEGG Pathway                        | beta-Alanine metabolism                                                                                                      | 0.005 | 0.039752937 |
| Oncomine Gene Expression Signatures | Ovarian Type - Top 5% under-expressed in Clear cell Ovarian Carcinoma (Lu)                                                   | 0.005 | 4.56E-01    |

|                                     |                                                                                                                                                |       |             |
|-------------------------------------|------------------------------------------------------------------------------------------------------------------------------------------------|-------|-------------|
| Oncomine Gene Expression Signatures | Prostate Type - Top 5% over-expressed in Prostate Carcinoma (Luo)                                                                              | 0.005 | 4.50E-01    |
| GO Cellular Component               | cytosol                                                                                                                                        | 0.005 | 0.52366635  |
| Literature-defined Concepts         | Down-regulated genes in 3 primary human fibroblasts (S1, S2, S3), after gamma irradiation                                                      | 0.005 | 3.51E-01    |
| Literature-defined Concepts         | Down-regulated genes in squamous cell lung cancer                                                                                              | 0.005 | 0.324825274 |
| GO Molecular Function               | amino acid binding                                                                                                                             | 0.005 | 4.47E-01    |
| GO Cellular Component               | ubiquitin ligase complex                                                                                                                       | 0.005 | 0.433352922 |
| Oncomine Gene Expression Signatures | Cancer Type - Top 10% under-expressed in Breast Carcinoma (Uhlen)                                                                              | 0.005 | 0.468443656 |
| Oncomine Clusters                   | Co-expressed across 7 CellLine samples (Carson_CellLine)                                                                                       | 0.005 | 8.73E-01    |
| Oncomine Gene Expression Signatures | Cell Lines Cisplatin Sensitivity - Top 5% under-expressed in Resistant (Gyorffy)                                                               | 0.005 | 0.459403346 |
| Oncomine Gene Expression Signatures | Multi-Tissue Type - Top 20% under-expressed in urothelial cancer (Uhlen)                                                                       | 0.005 | 4.53E-01    |
| HPRD Interaction Sets               | PARP1                                                                                                                                          | 0.005 | 3.238532943 |
| HPRD Interaction Sets               | HDAC2                                                                                                                                          | 0.005 | 3.238532943 |
| KEGG Pathway                        | Flavonoids, stilbene and lignin biosynthesis                                                                                                   | 0.005 | 4.31E-02    |
| Oncomine Gene Expression Signatures | Lymphoma Type - Top 5% under-expressed in Follicular Lymphoma (Elenitoba-Johnson)                                                              | 0.005 | 4.58E-01    |
| KEGG Pathway                        | Keratan sulfate biosynthesis                                                                                                                   | 0.005 | 4.17E-02    |
| Literature-defined Concepts         | Down-regulated genes in estrogen receptor alpha/beta heterodimer expressing U2OS osteosarcoma cell line, after 17beta-estradiol (E2) treatment | 0.006 | 0.33573674  |
| Oncomine Gene Expression Signatures | Bladder Type - Top 20% over-expressed in TCC (Blaveri)                                                                                         | 0.006 | 4.68E-01    |
| Oncomine Clusters                   | Co-expressed across 49 Breast samples (Farmer_Breast)                                                                                          | 0.006 | 8.92E-01    |
| Oncomine Clusters                   | Co-expressed across 28 Leukemia samples (Maia_Leukemia)                                                                                        | 0.006 | 8.92E-01    |
| Oncomine Clusters                   | Co-expressed across 72 CellLine samples (Baghdoyan_CellLine)                                                                                   | 0.006 | 8.62E-01    |
| Connectivity Map                    | MCF Cells Treatment - Top 1% over-expressed in 504, MCF7 treated with 5248896 (.000011 M) for 6 h (Lamb)                                       | 0.006 | 1.45E+00    |
| Oncomine Gene Expression Signatures | Ovarian Type - Top 10% under-expressed in Clear cell Ovarian Carcinoma (Lu)                                                                    | 0.006 | 4.77E-01    |

|                                     |                                                                                                                              |       |             |
|-------------------------------------|------------------------------------------------------------------------------------------------------------------------------|-------|-------------|
| Oncomine Gene Expression Signatures | Ovarian Type - Top 1% over-expressed in Endometrioid Ovarian Carcinoma (Lu)                                                  | 0.006 | 4.87E-01    |
| Oncomine Gene Expression Signatures | Ovarian Histology - Top 1% over-expressed in Endometrioid (Lu)                                                               | 0.006 | 4.87E-01    |
| Transfac TF Matrix - 1000bp         | 1-Oct                                                                                                                        | 0.006 | 0.540179617 |
| Connectivity Map                    | CellLine Batch - description - Top 5% under-expressed in 45, ssMCF7 treated with trichostatin A (.0000001 M) for 6 h (Lamb)  | 0.006 | 1.40E+00    |
| Oncomine Gene Expression Signatures | Cancer Type - Top 5% under-expressed in Colorectal Adenocarcinoma (Uhlen)                                                    | 0.006 | 4.85E-01    |
| Transfac TF Matrix - 1000bp         | HFH-1                                                                                                                        | 0.006 | 0.454647373 |
| Oncomine Gene Expression Signatures | Cancer Type - v1 - Top 1% over-expressed in Rectal Adenocarcinoma (Bittner)                                                  | 0.006 | 4.93E-01    |
| Oncomine Clusters                   | Co-expressed across 24 Uterus samples (Quade_Uterus)                                                                         | 0.007 | 9.88E-01    |
| Oncomine Gene Expression Signatures | Lung Cancer Type - Top 5% over-expressed in Lung Squamous Cell Carcinoma (Wigle)                                             | 0.007 | 5.40E-01    |
| Oncomine Gene Expression Signatures | Cancer Type - Top 10% over-expressed in Hepatocellular Carcinoma (Su)                                                        | 0.007 | 5.35E-01    |
| Connectivity Map                    | CellLine Batch - description - Top 5% under-expressed in 44, HL60 treated with sodium phenylbutyrate (.001 M) for 6 h (Lamb) | 0.007 | 1.53E+00    |
| Literature-defined Concepts         | Up-regulated genes in well-differentiated hepatocellular carcinoma compared to hepatocellular adenoma                        | 0.007 | 3.95E-01    |
| Oncomine Gene Expression Signatures | ER+ Breast Carcinoma AGTR1 Over-expression - Top 10% under-expressed in High (vandeVijver)                                   | 0.007 | 0.543796672 |
| Oncomine Gene Expression Signatures | Lung Adenocarcinoma Primary/Metastasis - Top 5% under-expressed in Metastasis (Bhattacharjee)                                | 0.007 | 5.41E-01    |
| Literature-defined Concepts         | Upregulated in Human Embryonic Stem Cells vs Differentiated Counterparts                                                     | 0.007 | 0.38151934  |
| Oncomine Gene Expression Signatures | Head and Neck Squamous Cell Carcinoma Stage - Top 5% over-expressed in IVB (Ginos)                                           | 0.008 | 5.54E-01    |
| Oncomine Gene Expression Signatures | Normal Type - Top 5% under-expressed in Vulvar (Hsiao)                                                                       | 0.008 | 5.50E-01    |
| Oncomine Gene Expression Signatures | Lung Carcinoma 3 Year Survival - Top 5% over-expressed in                                                                    | 0.008 | 5.52E-01    |

|                                     | Dead (Bild)                                                                                                                       |       |             |
|-------------------------------------|-----------------------------------------------------------------------------------------------------------------------------------|-------|-------------|
| Oncomine Clusters                   | Co-expressed across 93 Bladder samples (Blaveri_Bladder_3)                                                                        | 0.008 | 1.06E+00    |
| Oncomine Clusters                   | Co-expressed across 14 CellLine samples (Chen_CellLine_6)                                                                         | 0.008 | 1.07E+00    |
| Literature-defined Concepts         | Up-regulated genes in clear cell ovarian carcinomas compared with other histological types                                        | 0.008 | 3.76E-01    |
| Literature-defined Concepts         | Up-regulated genes in gastric cancer tissues                                                                                      | 0.008 | 3.76E-01    |
| Oncomine Gene Expression Signatures | Endocrine Syndrome - Top 5% under-expressed in MEN2B (Jain)                                                                       | 0.008 | 0.576133757 |
| Oncomine Gene Expression Signatures | Breast Carcinoma p53 Mutation Status - Top 1% under-expressed in Mutated (Miller)                                                 | 0.008 | 5.70E-01    |
| Literature-defined Concepts         | Up-regulated genes in adipocytes of obese Pima Indians                                                                            | 0.008 | 0.342529369 |
| Transfac TF Matrix - 1000bp         | HFH-8                                                                                                                             | 0.008 | 5.04E-01    |
| Oncomine Gene Expression Signatures | Breast Carcinoma Recurrence - 5 years - Top 10% under-expressed in Positive (Ma)                                                  | 0.008 | 5.76E-01    |
| Oncomine Gene Expression Signatures | Ovarian Histology - Top 5% under-expressed in Clear Cell (Lu)                                                                     | 0.008 | 5.70E-01    |
| Oncomine Gene Expression Signatures | Liver Type - Top 1% under-expressed in Metastasis to Liver (Chen)                                                                 | 0.008 | 5.67E-01    |
| Oncomine Gene Expression Signatures | Ductal Carcinoma in situ Progesterone Receptor Status - Top 10% under-expressed in positive (Ma)                                  | 0.009 | 5.73E-01    |
| Oncomine Gene Expression Signatures | Bladder Type - Top 5% under-expressed in Superficial Transitional Cell Carcinoma, Invasive Transitional Cell Carcinoma (Dyrskjot) | 0.009 | 6.00E-01    |
| Oncomine Clusters                   | Co-expressed across 18 Brain samples (Dong_Brain)                                                                                 | 0.009 | 1.13E+00    |
| GO Molecular Function               | peroxidase activity                                                                                                               | 0.009 | 8.20E-01    |
| Oncomine Clusters                   | Co-expressed across 44 Renal samples (Higgins_Renal)                                                                              | 0.009 | 1.06E+00    |
| Oncomine Clusters                   | Co-expressed across 7 CellLine samples (Carson_CellLine)                                                                          | 0.01  | 1.058904807 |
| Oncomine Clusters                   | Co-expressed across 72 CellLine samples (Baghdoyan_CellLine)                                                                      | 0.01  | 1.05E+00    |
| Literature-defined Concepts         | Differentially regulated genes between NSC 696860 sensitive and resistant cell lines, following exposure to the drug              | 0.01  | 3.76E-01    |
| Oncomine Clusters                   | Co-expressed across 28 Leukemia samples (Crossman_Leukemia)                                                                       | 0.01  | 1.06E+00    |
| Oncomine Gene Expression Signatures | CellLine Vinblastine-newanalysis - Top 1% under-expressed in                                                                      | 0.01  | 0.630945671 |

|                                     | Resistant (Staunton)                                                                          |      |             |
|-------------------------------------|-----------------------------------------------------------------------------------------------|------|-------------|
| InterPro                            | Haem peroxidase                                                                               | 0.01 | 1.170969907 |
| InterPro                            | Animal haem peroxidase                                                                        | 0.01 | 1.170969907 |
| InterPro                            | Haem peroxidase, plant/fungal/bacterial                                                       | 0.01 | 1.170969907 |
| InterPro                            | Aminoacyl-tRNA synthetase, class Ia                                                           | 0.01 | 1.170969907 |
| Oncomine Gene Expression Signatures | Colon Type - Top 5% over-expressed in Colorectal Carcinoma Metastasis to Liver (Graudens)     | 0.01 | 6.26E-01    |
| Oncomine Gene Expression Signatures | Renal Clear Cell Carcinoma Capsule Penetration - Top 5% under-expressed in positive (Lenburg) | 0.01 | 6.20E-01    |
| Oncomine Gene Expression Signatures | Bladder Grade - Top 5% over-expressed in High Grade (Dyrskjot)                                | 0.01 | 6.15E-01    |
